# Supplementary material for: Sequence determinants of improved CRISPR sgRNA design
Source: HighWire-hosted journal article supplement (doi:10.1101/gr.191452.115), 2015-06-10
Supplement: Supplemental_Table_2.xlsx [file Supplemental_Table_2.xlsx]

## Sheet: 40bp.matrix
Coefficients of nucleotide preference for sgRNA targets in CRISPR/Cas9 knockout. The coefficients were trained by Elastic-Net.
index	A	C	G	T
-30	0	0	0	0
-29	0	0	0	0
-28	0	0	0	0
-27	0	0	0	0
-26	0	0	0	0
-25	0	0	0	0
-24	0	0	0	0
-23	0	0	0	0
-22	0	0	0	0
-21	0	0	0	0
-20	0	0	0	0
-19	0	0	0	0
-18	0	-0.113781	0	0
-17	0	0	0.08029	0
-16	0.0258408	0	0.0726807	0
-15	0	0	0.100643	0
-14	0	0	0.0828395	-0.0709339
-13	0	0	0	0
-12	0.0215631	0	0	0
-11	0.129119	0	0	0
-10	0.0304838	0	0	-0.169986
-9	0.0936469	0	0	0
-8	0	0	0	0
-7	0	0	-0.214272	0.0737502
-6	0.20282	0	0	0
-5	0.129158	0	0	0
-4	0	0	0.107523	-0.34924
-3	0	0.235028	0	-0.145493
-2	0	0	0.238518	-0.300975
-1	0	-0.125928	0.353047	-0.221752
N	0	0	0	-0.15591
G	0	0	0	0
G	0	0	0	0
+1	0	0.179639	0	0
+2	0	0	0	0
+3	0	0	0	0
+4	0	0	0	-0.116646
+5	0	0	0	0
+6	0	0	0	0
+7	0	0	0	0
