# Supplementary material for: Sequence determinants of improved CRISPR sgRNA design
Source: HighWire-hosted journal article supplement (doi:10.1101/gr.191452.115), 2015-06-10
Supplement: Supplemental_Table_3.xlsx [file Supplemental_Table_3.xlsx]

## Sheet: Sheet1
The sgRNA targets at AAVS1 locus selected for the validation of mutation rates shown in Figure 3A
index	chrom	start	end	spacer	strand	sequence score	% indel
1	chr19	55627511	55627531	CTGCATCATCACCGTTTTTC	-	-1.03929	<2.0
2	chr19	55627444	55627464	ATCCTCTTGCTTTCTTTGCC	-	-0.865413	<2.0
3	chr19	55627615	55627635	TTCCCTTTTCCTTCTCCTTC	-	-0.854021	<2.0
4	chr19	55626755	55626775	ttccaaactgcTTCTCCTCT	+	-0.657558	<2.0
5	chr19	55627065	55627085	CTTCCTAGTCTCCTGATATT	-	-0.614226	10.4
6	chr19	55626418	55626438	AGGCCCTGCTCTGGGCTTCT	-	-0.601163	<2.0
7	chr19	55627321	55627341	CCCCTGTCATGGCATCTTCC	-	-0.588763	<2.0
8	chr19	55627025	55627045	AGATAAGGAATCTGCCTAAC	+	-0.571498	7.8
9	chr19	55626317	55626337	CTCTCCTGCCCCTTCCCTAC	-	-0.547553	<2.0
10	chr19	55627588	55627608	TGTGCCATCTCTCGTTTCTT	-	-0.515503	5.9
11	chr19	55627523	55627543	TGATGCAGGCCTACAAGAAG	+	1.10527	17.3
12	chr19	55627668	55627688	GGGAGGAGAGATGCCCGGAG	+	1.02248	4.9
13	chr19	55626876	55626896	GTGACCTGCCCGGTTCTCAG	-	0.833499	18.7
14	chr19	55626321	55626341	GGAAGGGGCAGGAGAGCCAG	+	1.63586	27.2
15	chr19	55626205	55626225	CAGGCCAAGTAGGTGGCCTG	+	0.901836	24.1
16	chr19	55627319	55627339	CCTGTCATGGCATCTTCCAG	-	0.831159	27.9
17	chr19	55626470	55626490	ATATGTCCCAGATAGCACTG	+	0.666742	12.4
18	chr19	55626804	55626824	GATCAGTGAAACGCACCAGA	+	1.07007	23.2
19	chr19	55627222	55627242	CGGGGACACAGGATCCCTGG	+	1.13204	28.2
20	chr19	55627439	55627459	GTCCAGGCAAAGAAAGCAAG	+	1.13794	17.1
