# Supplementary material for: Sequence determinants of improved CRISPR sgRNA design
Source: HighWire-hosted journal article supplement (doi:10.1101/gr.191452.115), 2015-06-10
Supplement: Supplemental_Table_4.xlsx [file Supplemental_Table_4.xlsx]

## Sheet: Sheet1
The sgRNA targets at AR and FOXA1 selected for the validation of protein knockout efficiency shown in Figure 3B and Supplementary Figure 2
gene	index	chrom	start	end	strand	spacer	sequnce score	% of knockout
AR	1	chrX	66765472	66765492	-	CCCAGCAGGGACAACGTGGA	-0.18726	44.5236
AR	2	chrX	66905888	66905908	+	GCACTATTGATAAATTCCGA	0.969036	92.0972
AR	3	chrX	66863150	66863170	-	CAGATCAGGCAGGTCTTCTG	0.571058	68.4187
AR	4	chrX	66863147	66863167	-	ATCAGGCAGGTCTTCTGGGG	0.56501	75.7446
AR	5	chrX	66905850	66905870	-	ACAGGTACTTCTGTTTCCCT	0.239997	72.453
AR	6	chrX	66863165	66863185	+	ATCTGTGGAGATGAAGCTTC	-0.45673	45.7223
AR	7	chrX	66863203	66863223	+	TCTCACATGTGGAAGCTGCA	-0.29043	50.378
AR	8	chrX	66905947	66905967	+	GAAGCAGGGATGACTCTGGG	0.951819	81.7955
AR	9	chrX	66863129	66863149	-	GGTGGAAAGTAATAGTCAAT	0.496409	82.9595
FOXA1	1	chr14	38061355	38061375	+	GCTGGTTCTGCCGGTAATAG	0.799367	60.9371
FOXA1	2	chr14	38061639	38061659	+	CCCATGGCGCCCATGCCGCT	-0.1938	38.0223
FOXA1	3	chr14	38061651	38061671	-	GCGCTGAGCCCGAGCGGCAT	0.645455	89.0561
FOXA1	4	chr14	38061731	38061751	-	GCGCAGTAGCCGGCATGCCG	1.25311	83.6184
FOXA1	5	chr14	38061898	38061918	+	CCGGGACGGAGGAGTAGGCC	0.178571	65.3203
FOXA1	6	chr14	38061839	38061859	+	CATGGTCATGTAGGTGTTCA	-0.6601	34.3942
