# Supplementary material for: Sequence determinants of improved CRISPR sgRNA design
Source: HighWire-hosted journal article supplement (doi:10.1101/gr.191452.115), 2015-06-10
Supplement: Supplemental_Table_5.xlsx [file Supplemental_Table_5.xlsx]

## Sheet: PLX
sgRNAs targeting genes positively selected upon PLX treatment
genes	spacer	predicted effective score	log2 fold-change upon treatment				is positively selected
			PLX day 7, rep1	PLX day 7, rep2	PLX day 14, rep1	PLX day 14, rep2	day 7	day 14
CUL3	TGCCAGATGTTAATGATTTT	-0.671746	0.0747896	0.360518	-0.941873	-0.840244	no	no
MED12	CTCAGAGATTGCTGCATAGT	-0.66961	1.63898	1.33013	5.31412	5.25017	all	all
NF2	CCTGGCTTCTTACGCCGTCC	-0.469129	1.22383	1.78427	6.1481	6.51998	all	all
MED12	AGGATTGAAGCTGACGTTCT	-0.397229	1.08178	2.28369	5.46427	6.69997	all	all
CUL3	CTTACCTGGATATAGTCAAC	-0.340068	2.43555	2.62907	5.76822	5.98524	all	all
CUL3	AATGTCTGCAGAATTTTTTC	-0.322347	-0.868461	0.383705	-3.50544	-1.78783	no	no
NF2	ATTCCACGGGAAGGAGATCT	-0.251316	0.240752	0.281519	1.80159	2.31962	no	all
TADA1	TCTGCTTGAACCACAGCTTT	-0.241804	0.506394	0.80953	0.08709	0.966983	no	no
NF1	ACACTGGAAAAATGTCTTGC	-0.00124999	0.49335	0.0425049	4.0154	4.62002	no	all
MED12	ACAGGTCATCTTAATGAGCC	0.0457208	1.15532	1.6382	5.30968	5.73968	all	all
TADA1	AGCTCATAGACTTCTCACAC	0.100072	2.06475	2.59524	4.4874	4.89945	all	all
NF2	AAACATCTCGTACAGTGACA	0.13959	1.40443	1.73063	5.35562	5.42543	all	all
CUL3	TTATTTAGTCGTGTGCCAAA	0.143595	0.432809	0.178562	-1.68283	-1.57489	no	no
CUL3	GACCTAAAATCATTAACATC	0.182686	2.28769	2.98922	5.19747	6.37312	all	all
TADA2B	GCCATCGAGCAGTTCGGCTT	0.273292	1.1988	1.89972	2.7477	3.17565	all	all
NF1	GTTGTGCTCAGTACTGACTT	0.302858	2.54026	4.43747	8.2916	10.2559	all	all
NF2	GTACTGCAGTCCAAAGAACC	0.359823	1.61594	1.84358	6.77817	7.01944	all	all
MED12	CGTCAGCTTCAATCCTGCCA	0.414328	1.47842	2.07299	5.45821	6.06846	all	all
TADA2B	TTACGAGATCGAGTATGACC	0.479185	1.15675	0.858647	2.33399	1.67588	partial	all
TADA2B	ACGGCGGGCGCTTCACGCTC	0.484533	1.32916	2.43289	3.8234	5.02032	all	all
CUL3	GAATCCTGTTGACTATATCC	0.494348	3.54117	3.48521	7.22644	7.20691	all	all
TADA1	ACTGGGCTAACCTAAAGCTG	1.15582	1.291	2.8113	3.50318	4.99102	all	all

## Sheet: alpha_toxin
sgRNAs targeting genes positively selected upon alpha toxin treatment
genes	spacer	predicted effective score	log2 fold-change upon treatment		is positively selected
			rep 1	rep 2
PIGO	ACAGTGGATAACGGCATCT	-0.400131	5.13176	7.77417	all
PIGP	CTCCTTAGGCTTAACTTAC	-0.329723	-4.92945	-4.74271	no
PIGB	GTCTGCTGTAGCGGATATA	-0.264031	-3.77665	5.96188	partial
PIGX	TAGGAGCCGGCAGGTCTGT	-0.196178	7.31716	6.9847	all
PIGX	ATTCATTGGACAAGTAGTT	-0.196068	-5.20092	-5.28564	no
PGAP2	GGCAGAGAAGGCGGTAACC	-0.14405	-0.68886	-0.804585	no
PIGA	CATGCTTATGGAAATCGAA	0.0180794	7.27245	-0.304375	partial
PIGB	CTCGAAGTTGCACACCGCA	0.0235882	6.12431	7.90032	all
PIGX	GTTGGCTTCACTACGAGAA	0.0258335	6.5247	-2.35433	partial
DPM3	GCAGCCAGCGGAGACCAAC	0.0416675	-2.78836	-3.27364	no
PIGO	GGCCGGCTGTACCGATCTC	0.0444876	-3.52467	-3.19592	no
PIGA	CAGTAGGATCTACAGCGTT	0.054014	10.14	10.1445	all
PIGO	GCCCTGTGCATCGAGTCTT	0.111678	-4.83186	-4.61702	no
PIGM	TCTACCTCAGCGAACTCTT	0.183645	8.31831	7.30163	all
PIGM	CGACGATGACGAGCGTCTC	0.214638	-0.448773	10.1732	partial
PGAP2	AACGCCACACGTAGCGTTG	0.235894	3.98623	3.99475	all
PIGB	AGGCTCGAGGTCCGTGAAC	0.245564	-2.89859	-2.91401	no
PIGP	AAGGAGTTTAACCAAGATT	0.26973	3.52259	1.1798	all
PIGX	TGCTTAATTAGGAGCCGGC	0.273956	-2.17414	9.24256	partial
PIGP	GGCCAGTAAGTTAAGCCTA	0.29909	5.92779	3.93429	all
PIGA	GACATCAGCAAATCCGAAA	0.338709	-2.76441	4.23569	partial
DPM3	CCCCTGCCGAGAGGTCCTG	0.357382	5.60945	-2.79309	partial
DPM3	GGCCACAGGACCTCTCGGC	0.360521	1.64669	12.0829	all
PIGO	GGTACTGATAGACGCTCTG	0.364114	8.64324	8.78782	all
PIGM	GAGTCCGCGTTGCCCCGGC	0.365949	9.14445	6.31214	all
PIGM	CGTGCGCCGCGGTGTTCTA	0.383644	-2.80802	-2.90789	no
PIGX	ATCCTGCCGGGCATAAATG	0.425183	11.0164	6.75963	all
PGAP2	GTGAGCTCCGCCATTGGTG	0.515842	9.05752	8.37428	all
PIGM	GACGCCGCGCGCTTCGTCA	0.527013	5.58475	12.181	all
PIGB	TAATTGGACCAGCGTCCAC	0.587987	-3.03809	-2.16097	no
PGAP2	GAAACGCCACACGTAGCGT	0.629194	2.08172	8.91843	all
PIGA	CACTCCAGACCCATTTAGG	0.767928	10.6569	10.9737	all
DPM3	CCTACCTGTTGGTCTCCGC	0.782213	9.61829	12.5058	all
PIGO	AAGTGCTGGTAACGCGCAG	1.01209	7.80381	11.4999	all
PIGB	TTAAGTATTCGCAGAGCGA	1.01963	-1.44651	7.31331	partial
PGAP2	TAGTGGTTCCAATAGGCGA	1.58077	10.7971	10.784	all

## Sheet: 6TG
sgRNAs targeting genes positively selected upon 6TG treatment
genes	spacer	predicted effective score	log2 fold-change upon treatment		is positively selected
			rep 1	rep 2
HPRT	ATTCCTCATGGACTGATTA	-0.338106	-5.05863	-5.05863	no
MLH1	CTTTGGAAATGCGGTTAGT	-0.151923	-3.93486	6.34998	partial
MSH2	TTTCTTGGCAAGCCGGTTA	-0.0925561	-1.97093	-1.97093	no
MLH1	ACCTATGGCTTTCGTGGTG	-0.0489781	10.3952	10.4702	all
PMS2	TGAGTCAACGGAAACGTTA	-0.0093024	10.307	8.44078	all
PMS2	CCACGGGTCTGCAAGCGTT	0.115767	11.4743	5.76018	all
MSH6	ACCGGCCAAACGCAATCTC	0.187455	9.44689	7.77208	all
MSH6	GCCTCGTCGCCGGAGGCAA	0.196579	0.247061	10.214	partial
MLH1	AAGTGAACTTCGTGCTTGG	0.212398	11.3624	11.3086	all
HPRT	CTAGAATGATCAGTCAACG	0.29945	-4.01018	-4.01018	no
HPRT	TCATGGACTGATTATGGAC	0.311464	-2.79157	7.03682	partial
PMS2	GAAACTCTTTGTAACGCAC	0.376192	8.44718	10.543	all
MSH6	GAACCCGGGTCCCGGTCCG	0.387315	10.1889	0.0878077	partial
MSH2	TTAATACCCATAACGCCAA	0.388603	8.77664	-1.58978	partial
MSH2	ATCTCAACCGGTTACTGAA	0.474783	10.9294	12.275	all
MSH6	GAGGCGCGATGTCGGAAAA	0.549843	11.2425	11.8124	all
PMS2	TGTGGTTCCTTTAGGTCGG	0.557721	8.6704	8.58485	all
MSH2	GGAGAACTGATCATTCTCG	0.560022	11.1017	9.92067	all
MSH2	TGGGTCTTGAACACCTCGC	0.622568	11.7069	12.6708	all
MSH6	TGGCAAAGGCGCTCCAAAG	0.691797	-2.85803	-2.85803	no
PMS2	CACAGTGCACGCACGGCGC	0.779252	-1.6325	-1.6325	no
MLH1	CTGCCCAATGCCACAACCG	0.878949	10.3327	10.7375	all
MLH1	GCAGCTAGACCCACGACAG	1.05746	12.3191	1.41686	all
HPRT	TAGAATGATCAGTCAACGG	1.29588	-0.869289	9.1451	partial

## Sheet: anthrax_toxin
sgRNAs targeting genes positively selected upon anthrax toxin treatment
genes	spacer	predicted effective score		log2 fold-change upon treatment		is positively selected
			rep 1	rep 2	rep3
FZD10	CCCATCGAGATCCCGATGTGCA	-0.49246	-4.32193	-4.32193	-4.32193	no
CD81	TTGGCTTCCTGGGCTGCTAC	-0.431594	-4.32193	-2.91982	-4.32193	no
PLXNA1	CCCCCCTTCCGCACCTTCT	-0.272119	-4.32193	-4.32193	-4.32193	no
FZD10	AGATCCCGATGTGCAAGGACAT	-0.00584017	-4.32193	-4.32193	-4.32193	no
PECR	GCTAAGGGCAGGAGCTACC	0.0369078	-4.32193	-4.32193	-4.32193	no
CD81	GGCTGCTACGGGGCCATCC	0.121956	-4.32193	-4.32193	-4.32193	no
PECR	GCCAAGTGGCCATCGTCAC	0.335278	2.19767	3.49364	-3.88502	partial
PLXNA1	CTGCTGCTGCTGCCGGGCATGT	0.372103	2.40157	3.98028	3.8048	all
PLXNA1	CACCTTCTCGGCCAGCGACTG	0.383571	-4.32193	-4.32193	-4.32193	no
ANTXR1	CCACGGCGGAGCGGAGAGCCCT	0.666623	11.4686	10.4422	11.3544	all
CD81	TGAGGTGGCCGCCGGCATCTG	0.757182	3.15466	2.87698	1.18257	all
ANTXR1	AGCGGAGAGCCCTCGGCAT	0.813863	9.61506	9.46917	10.6394	all
FZD10	ATGGGCCACGAGAACCAGCGCG	1.62668	1.36111	4.56901	1.48321	all
