# Supplementary material for: Sequence determinants of improved CRISPR sgRNA design
Source: HighWire-hosted journal article supplement (doi:10.1101/gr.191452.115), 2015-06-10
Supplement: Supplemental_Table_6.xlsx [file Supplemental_Table_6.xlsx]

## Sheet: CRISPRi_neg_select_efficient
efficient sgRNAs targeting negatively selected genes in CRISPRi
gene	spacer	spacer length	phenotype score
COPB2	GACGGTCAGTGGATCGGT	18	-0.711716
POLR1D	GTCCCATAGCGCGAGGCG	18	-0.653561
UBA3	GAGGAGCCGTAAGTACCG	18	-0.632717
RPS20	GAGGAAGACGCGGTCGTA	18	-0.626414
PES1	GACTAGGGCCGCGCGTAC	18	-0.614604
CARF	GAGCAGTCCCACGACAGT	18	-0.556544
RFC3	GACGGCTGGACTATCACA	18	-0.532826
SLMO2	GAGGGACGTCCAGACGCG	18	-0.485223
TTK	GGAGCCAGGTATGCGACG	18	-0.474827
EIF3F	GGCCGGAGGAGCACTTAC	18	-0.453779
RIOK2	GCGCGTGCGCGAGCCATC	18	-0.451919
NOL11	GTGAGCGCGGCCGTACTT	18	-0.394852
MFAP1	GGGATGGTGGACGACGTT	18	-0.393894
WDR33	GCGTTCGGTGGCCCATAG	18	-0.381872
DDX27	GGGACCTGAGGAATCGCG	18	-0.37827
TPX2	GCTCGGTCGCCGCCTAGG	18	-0.374809
TPX2	GCGGCGCGAACGGCGCTA	18	-0.348253
NUF2	GCCCACGTCCAACCGCGA	18	-0.338686
ZC3H8	GGTCCGTCTCGTCGCGTC	18	-0.338021
C12orf60	GAATGTACCGTTCTCGGA	18	-0.334213
CDC5L	GCTCTCGCGAGATAGCGG	18	-0.31733
CWC22	GGTAATTATCGAACTCCG	18	-0.313815
WDR5	GGACTCAGCTCGACAAGG	18	-0.307337
MIS12	GCCGAGGCGCGTATCAGT	18	-0.293897
SRSF1	GCTCGGCGCACGGATATG	18	-0.281672
EIF2B3	GCTACACCGGGTCGAGCA	18	-0.267096
RPA2	GCTCCGCCATTCGCGGGA	18	-0.265606
EIF5B	GGGGTTGGGTCCGTACGG	18	-0.263842
CWC15	GAGCTAGCGCCTACGACC	18	-0.262472
PNISR	GAGGTGTTACCGGAACGG	18	-0.259399
C3orf17	GCCATCATGCGAGGCGGG	18	-0.256871
NUDC	GAGCTCCGGGACGTGGAT	18	-0.221774
SMC1A	GGACCCCTTATCCGGTGC	18	-0.217626
RRM2	GCGGCGCGGGAGATTTAA	18	-0.200699
RFC4	GGGCGGGAATACGCCGGT	18	-0.172854
HAUS5	GTCGGGTCACTCTCGATG	18	-0.172197
EIF6	GGCCTCCGGCGGACTCTA	18	-0.158904
RPL28	GGCGGCGGGACCGAATTC	18	-0.158534
POLR2G	GGAGTTCCGCCCTCGCGG	18	-0.158198
PSMA5	GACCTGTCGTACTCAGAC	18	-0.1526
RRS1	GGTTATGCTGCCGGAGTT	18	-0.152424
CHMP3	GACGGGTTCAGTTCGTCA	18	-0.151803
RPL10A	GACACCAAGTAGAGCGAC	18	-0.145416
PLRG1	GGGGAAGAGAGCAGGGAG	18	-0.140501
RPL30	GCCTAAACCTCGGTCGGT	18	-0.140471
CWC22	GGTGGCGGGTCGCCGGAT	18	-0.138771
SPC25	GGCCCCCCTGTCGCAATA	18	-0.13829
POLD3	GAACGCGGGCGTGCGACC	18	-0.132807
WDR70	GCATTTGCCGCAAGTTAT	18	-0.130466
NOP2	GGCGTCGCGCGTGTCGGA	18	-0.128134
MRPS18A	GCGGCGGGCGCTACGTTC	18	-0.127664
RPS14	GGGGGCATCCTGCGGCGA	18	-0.127636
NAA25	GTGCAGGACCCTAACGAC	18	-0.123576
MED22	GGCGGCTGACTAGGTTTT	18	-0.113092
RPLP2	GGAAGGCGCCGACGCAAG	18	-0.105997
TUBGCP4	GGACTCGAGGTCCGCCGT	18	-0.104654
RPL4	GCCTTACCCCGTATCTCG	18	-0.0876753
AAMP	GCCGCATGGAGTCCGAAT	18	-0.0746659
RPL12	GCTTGTCCGCGCGATTTC	18	-0.0688036
DUT	GGCGGGAAATTTCGGTTT	18	-0.0619691
CSTF1	GACCGCTGCGCTATCGAT	18	-0.0615218
EIF4G2	GATCCGGTCGTCGgggat	18	-0.0555019
TXN	GTCTGACGAGCGGCTGTA	18	-0.0512174
WDR70	GGCGCCGCTGTAGCTTGA	18	-0.0510072
TP53I11	GAGCTCCGAGCCGTTAGG	18	-0.0456568
IPO13	GAGGCGTCCAACGAAGCG	18	-0.0456071
LLGL2	ggtggatcacatgaggtc	18	-0.045416
RPS5	GGCTGCAACCCCTCGCGC	18	-0.0425641
PLRG1	GTACACACCCTTGTGTTC	18	-0.0389917
SHFM1	GCGTCGGAGGCGGTAGTGA	19	-0.752077
POLR1D	GGAAGCAAGGACCGACCGA	19	-0.728924
MTHFD1	GGCCAGTCCCTAAGCACGT	19	-0.688708
LSM6	GCGGTGCGGCTCACCTCGC	19	-0.671598
CENPI	GAATTCCGGAGGCGGCATT	19	-0.670317
MIS18A	GACGCGTCGGTGGCCGACA	19	-0.649822
SNW1	GAGCGGGTGAACTAAACCC	19	-0.637611
MCM6	GACTTGTGGCGGTCGAGCG	19	-0.629851
MED7	gctcGGCGTCCCAACACGG	19	-0.623831
DDX56	GGTCGCGACCAGCCCAGAT	19	-0.603513
COPB1	GCCGCGGATCCGTCTACTG	19	-0.594275
PSMA3	GGTATAGGGGAAGCGCTCC	19	-0.578609
SARS	GGCGCAGTGCGGCGGTCAC	19	-0.565503
RIOK2	GAGGCATCTGGGTTCGGAC	19	-0.564847
UTP6	GGGTCTCCGAACCTGAAAC	19	-0.554265
TTK	GAACAGCCGCAGCCGGTGT	19	-0.546733
RACGAP1	GAGGCGCGGAGCGAAGTGA	19	-0.532444
UTP3	GTCTGCAAACTCCGGTGGT	19	-0.526172
KIF23	GCGAAGACTGCGGGACGTT	19	-0.520134
NDUFAB1	GCGGGCAGGCGGCTGACAT	19	-0.508859
PSMA5	GGTGCCGGTGGAGTCGTGT	19	-0.505059
TARS2	GAACATGGCCCTGTATCAG	19	-0.501169
PDCD11	GCCGCGGTACTCACACACG	19	-0.498697
RRP12	GAGCGTGTTTCTACGTCCC	19	-0.497218
DHX15	GGTTCCGGCCGCACCGTGT	19	-0.495631
TANGO6	GCTGGACCCGGGACTCTCA	19	-0.493729
PHB2	GGGTTCGGGCCCGTAAGGC	19	-0.492584
SUPT6H	GAGTCGTCGAACCGAGACT	19	-0.492451
ATF5	GCCATGGCCGGGGCTACGC	19	-0.491736
CENPC	GGCAGTCGCCTGAGACTTA	19	-0.486126
DHX8	GCGGGAGCCTTAATCGGGT	19	-0.482159
LSM2	GAAAGCTCCAAGCGCTGAC	19	-0.481316
PMF1	GTAGCGCCAATCTAGGCAG	19	-0.465475
RPL39	GACTTACCATGGCGAGCAG	19	-0.463636
CHAF1B	GTCCGGGTCCCTCCAGGTA	19	-0.462397
RPL39	GGCTCACTAGCTTCCCTCC	19	-0.456757
ORAOV1	GGTCTGCTACGGCACCGCG	19	-0.454849
EFTUD2	GCGGGTCAGCGGCACGGAA	19	-0.454783
TWISTNB	GGTGGCCGGGCCGCACCAA	19	-0.454076
NPAT	GAACCAGGAGATGCGGCGC	19	-0.45365
RRP12	GGCTACAGGGTATCCACGT	19	-0.448456
GINS1	GGGGCGGGTAGACTTGGAC	19	-0.443959
NBAS	GAGTCCTCGGCGAACATGG	19	-0.441511
TAF8	GGTGGCTCCGGAACGGTAA	19	-0.436762
FDPS	GCTCCGCGATCGGCTCTGT	19	-0.436691
NSRP1	GTGAGTGATCCGGGAGTTA	19	-0.435811
COPB2	GATCGGTGGGTTTATCTCA	19	-0.435146
HSD17B10	GCCCAACGGCCACAATACC	19	-0.434754
INTS4	GGCGGCGCACCTTAAGAAG	19	-0.432462
RFC5	GGTCACTGTGCAGGCGCTT	19	-0.430171
SEC61A1	GTGCTAGCCCGGCGGCAAg	19	-0.417398
HSD17B10	GGTGAAAGTCAGCACTCCG	19	-0.416111
CLNS1A	GCTGGAGCAGGCGGTGCGA	19	-0.413895
KIF23	GCGGCGACGCTAAGAGCCC	19	-0.411923
TCERG1	GCCCGGGCCGGGACCGCAT	19	-0.410137
CCT2	GCGGAACTCCTCGGAACCA	19	-0.408235
KANSL2	GCCACTAGAGAAGGGCGAG	19	-0.406811
EIF3A	GGCGCGTGGGACCTTACGC	19	-0.405103
TTC27	GTTACCGTAAATACACCTG	19	-0.402612
RPS27	GTCTATGCGGGTGGCCCGT	19	-0.402501
SPC24	GCTCACCTCCTCTATGTCG	19	-0.40226
WDR5	gcccggcggggaacacgtg	19	-0.393409
RPL36	GATATCCCGGAGTTCCGCG	19	-0.392594
UTP6	GACGCGTCGGTGGTAGGGC	19	-0.389054
RPL27A	GAAACCGTACACCGCCACC	19	-0.387123
GINS1	GGACGGGGCATGCCGGCGT	19	-0.38521
PET112	GGCTGCCGTGGAAGACGTT	19	-0.383327
MCM10	GGGCGTGCGTGTGACCCTc	19	-0.380044
NUP62	GGCGCAGAAGTAGTACGGT	19	-0.379463
RPS15A	GATTGCAGGATGGCGCCGA	19	-0.378826
POLR1E	GGTGTTGCCGAGTGCGAGG	19	-0.378341
HSD17B10	GGCGCGGGCGCTCGTTGAT	19	-0.377545
RBMX	GCGCAACGAGGGCGAACAA	19	-0.376481
EXOSC6	GCCTGTCGCGGGCCCGACA	19	-0.373719
AQR	GCGCCCCGGCAGTAACTTA	19	-0.373227
ATP6V1C1	GCCGGAGCTTAGGTCGGGA	19	-0.373029
HSD17B12	GTACGAAATACGCAGGGCT	19	-0.372663
PRPF19	GCGCCTCGGAGCACGGTGA	19	-0.371811
RPL17	GCGAGGATTTAGTAGCCCT	19	-0.371326
SRSF1	GCTCGGCGCACGGATATGG	19	-0.370817
CDC5L	GTAACAGCGATTGGGCCAC	19	-0.370495
TPX2	GCGCGAGCCAACCCGCCGC	19	-0.370468
MPHOSPH6	GAGGCTCGCGGCCGGAGTG	19	-0.36931
CDC5L	GGCTCTCGCGAGATAGCGG	19	-0.366594
SCFD1	GTCTGCCTTTCCCGAATAC	19	-0.365171
POLR2I	GTTCTTCCAATAGCGGCCC	19	-0.36269
WDR70	GCCTTCCGCAGAGGGACCG	19	-0.362182
ATP6V1B2	GCTACCCGTGCCCACCGGT	19	-0.359695
RRP12	GCCATCTGCCGCCACCGTC	19	-0.359292
MIS18BP1	GTGTTAGAGAACGTCGCGG	19	-0.35892
RPL10A	GCGCGGATGAACGCGGATA	19	-0.358317
PLRG1	GGGATACACGGTAGCATCA	19	-0.357644
REXO2	GTGGGAGTCACGGACGGTT	19	-0.357142
MRPL10	GACGGAAGCCGAGTGGAGA	19	-0.356036
UTP6	GTCCGGACGCGTCGGTGGT	19	-0.355067
IMMT	GGCGGCGCGAGTTAAGTGG	19	-0.351984
SGOL1	GCGACGGCGGACGGTGGTA	19	-0.350536
COPZ1	GTCAGGGTTCAGCCCGAGT	19	-0.347216
INTS8	GAGTTTCCGGGACGTTCGG	19	-0.346911
PRPF19	GCGCTACGCTAGCATCGCT	19	-0.346175
METTL16	GCGTATCATCTGCGTTTCT	19	-0.344419
RPS19BP1	GGTTTCCGCCGAGACGACA	19	-0.343535
INCENP	GGTCCGGAGTCGACAGGGA	19	-0.342476
TAF2	GCCGGGAAGCCAAGCTCCG	19	-0.340209
EFTUD2	GTAAGTTGAAGCGGGTCAG	19	-0.338634
SMC2	GTGCGTGAGCACGGCCGGT	19	-0.336229
UTP3	GAAATTCCAGTAGCCGATC	19	-0.336191
PHB2	GGGTCCGTAGTGGGCTAAG	19	-0.335013
XRCC6	GGTCGCTTCCCTGCGCCAA	19	-0.334599
RPS6	GAACGCCTCCGAGGCGCCA	19	-0.334525
TSR2	GTTGGCTGGGCGGCGTAAG	19	-0.33391
NRDE2	GGCTTAGTGAGGCTCCCGA	19	-0.333846
TICRR	GCGCGGGAGCCTTTCGACC	19	-0.332271
MNAT1	GGCGCCTGCGAGAGTCTGT	19	-0.332079
SCO1	GCCATGAGCCTCGGAGACC	19	-0.332059
CENPI	GGAACCTGTAACGTCCCAC	19	-0.330049
RPL38	GTGTCTCTAGGGTGATACG	19	-0.329498
MED10	GAGAAGTTTGACCACCTAG	19	-0.325188
LSM2	GCGCGGCCGACTTGCGGCT	19	-0.325136
NDUFAF5	GCGTGACGCTCCGCCGTAA	19	-0.324721
WDR33	GGCCACCGAACGCACGCTC	19	-0.324214
PSMC4	GGCCACACAGAGGCCGGCT	19	-0.323534
FARSB	GGTCCTACGCGCTTCGCTA	19	-0.322402
MCM4	GCAAGCGGCCGCCTTTCCA	19	-0.319852
NLE1	GTCTGGTCGCCCGCCCAGA	19	-0.319687
MED18	GCTCGGGTAACCGGAGTGC	19	-0.319391
RRN3	GATAGGAGCACGGGGTGGA	19	-0.317081
MED12	GCTGGTGCCTCCGGCGCTA	19	-0.315224
MARS2	GCAGACCGGCCGCAAGCGG	19	-0.315136
KIF23	GAACTTCGCGGCTAAGGCG	19	-0.315056
ATP6V1A	GTGAGCGGCGACCGGTAAC	19	-0.314627
SEH1L	GCTCCCGGGCTGCGAGGTC	19	-0.312979
NKAP	GGTGACGACCGCCTAGATC	19	-0.31263
ACTL6A	GCCAGTTAGCCCTTAGGGT	19	-0.312596
GNL2	GTGCGAGGTCCGGCTTACG	19	-0.312386
RBMX2	GGAAGGAGCAGCGGGCCAC	19	-0.311888
TUBGCP5	GCGGAACATGGCGCGGCAC	19	-0.311406
LSM6	GCCTCGGCGCTTTCGGTTT	19	-0.308521
PNISR	GTAGAAGCATCGAAAGCGT	19	-0.308324
PSMA1	GAAGTGTCGGAGGCTCCCC	19	-0.307321
NOL6	GTGGGTTGAGCCATCGGGG	19	-0.304851
CHMP6	gcgcggccgccgTAGCGGG	19	-0.304475
CCT4	GCCGGCCGCAGTGTAATAA	19	-0.303424
ATR	GCGGTAGCTTTGGAGACGC	19	-0.303391
NOC3L	GGTTTTCACCCGTGTCTAG	19	-0.302926
SRSF1	GGAGACGTGGTGCCGCTGC	19	-0.301816
SMN1	GGGTGCTGAGAGCGCTAAT	19	-0.300345
SMN2	GGGTGCTGAGAGCGCTAAT	19	-0.300345
NEDD1	GCACCTCCCGGAGCCTTGT	19	-0.299757
COG3	GACGGCGCCGCTGACCGAC	19	-0.297671
USP39	GTGAAGCGGGAGTTCGAGC	19	-0.29711
ZNHIT6	GACCGGTAATTCCTCCTAT	19	-0.297001
HAUS1	GGCTTGCAGATAGTGACGG	19	-0.291861
SHFM1	GTCGCGCGAACGGTGACTC	19	-0.291087
SNRNP200	GCCGTTTGCAGCTTGCGGT	19	-0.290189
RPL10A	GGCGCGGATGAACGCGGAT	19	-0.29016
MTHFD1	GCGGGAGGGACACTTGTAG	19	-0.289685
DYNLRB1	GCGGGGCTACCGGATCGGT	19	-0.289372
EXOSC2	GCGCAGGCGCAGCTCAGTC	19	-0.288047
RRS1	GCGCACCGCAGCCCGGTCG	19	-0.287861
NUDC	GCGGACGACTAGAGTCGTT	19	-0.287081
RBM8A	GCTCAGACACTAGGTACCT	19	-0.286698
RPL15	GGCGGCGCGAATTCGAGCT	19	-0.284937
TCERG1	GAGTGAACGATTCAACCCG	19	-0.283408
NUP160	GCCCTGGAACGGAGCTTCG	19	-0.279169
NAT10	GACACCAGGCATACGCTAG	19	-0.279091
RPL6	GGACATGTCCGACCCCTGT	19	-0.278702
CDC27	GCAGCGTAGGGCCACTCCG	19	-0.278094
AARS	GGCTTCTCCAGGCCACGCG	19	-0.277892
MED10	GGCCGGGAAGCGTGTGCTA	19	-0.277028
POLR2H	GGATGCCCGCCATCGCGAG	19	-0.275154
CWC22	GCGGGTCGCCGGATCGGGT	19	-0.274915
VPS29	GCTGCAGTTGCGGCGACCA	19	-0.274009
RPL26	GGCCGACAAGAGACTCTCG	19	-0.273148
PSMD6	GCGCACGGCAGCGTCTCCG	19	-0.272752
CHMP3	GAACCCGTCTTGCCCCTTC	19	-0.271828
BMS1	GGTTCGGTGCTGCGGGTTG	19	-0.271322
TAF1	GCGACGAAGATTCCGCTGG	19	-0.268947
NUPL1	GGGCTCGACGCCGTCAGCA	19	-0.268791
RPA1	GCGACGGGGGATGAACGCG	19	-0.265977
COPB1	GCCGCAGTAGACGGATCCG	19	-0.265833
RPL3	GATTCAGCCGTGCCGACGC	19	-0.265687
RFC5	GGTGACGCGACGATCTCAG	19	-0.264676
RRS1	GATGCCGGGATGCCCAATC	19	-0.263891
CENPE	GGCCGTCTGCGTGCGAGTG	19	-0.2635
RPA2	GGCTCCGCCATTCGCGGGA	19	-0.263364
PDCD11	GGGGCTGCTACAACAGAGC	19	-0.261997
THG1L	GTTAAGGTTCACGATTCCT	19	-0.260817
GTPBP4	GGAAATGATCCCGAGTACG	19	-0.260649
TAMM41	GACACCGGGTAGGCGGTTT	19	-0.260415
PSMD4	GGGACTATCCGCCACTCCA	19	-0.260303
RPL10	GCCTGCGCATGGCTTATAT	19	-0.259417
TTK	GCGGCTAAACGAGCTGGAG	19	-0.258899
CLTC	GCGCCCggttccgccattg	19	-0.258884
POLR2B	GACTGTGCAGCCGGCGCAT	19	-0.258781
PSMA7	gcctgacgccgccCGTCGC	19	-0.258416
LSM5	GCCATGGCTACGCCGGAAG	19	-0.258185
SHFM1	GAGCAGCGCGAGGAATGCT	19	-0.257316
DERL2	GCGTACAGGGATTACTCTG	19	-0.256552
EIF5B	GATAGGGGTTGGGTCCGTA	19	-0.25582
ATP6V1B2	GATATACCAAGGCGGCCCG	19	-0.255183
EIF3A	GCGTCAGCGAACTCTCTAG	19	-0.254996
BNIP1	GTAGCCGGCGTCCCCAACA	19	-0.25479
GTF2B	GCCTCCGGGCAGCCTCGTA	19	-0.254773
RPL12	gcaacACCGGGAAGGTCTC	19	-0.253289
NOP2	GAACGGCAGAACGCACGCT	19	-0.252822
C12orf60	GTACTAGATGAGCGCAATG	19	-0.252435
INCENP	GCCCAGACCCACTTGGCTC	19	-0.250088
CENPA	GGCCCATGACACGCCGCAG	19	-0.249658
SNRPF	GGCCGTGGTTACGATGGTA	19	-0.248838
FARSB	GGAAGCATCCGGGACTTCA	19	-0.247343
GEMIN5	GGTGAGTTACCTCGAAACG	19	-0.24524
EXOSC5	GGCAGCGCGCGCCGCAAAC	19	-0.242068
REXO2	GAGCCGGCGCACCGTACGC	19	-0.240772
SNRPG	GACATTCGGCTAACGGAGA	19	-0.240455
MRPL22	GTACTGGGACAGTTGGGTA	19	-0.239794
TCERG1	GTAATGGCGGAGCGTGGCG	19	-0.235538
TIMELESS	GATCCTTTCGAAGCTATGG	19	-0.228699
CEP192	GGCCTCAGGGCGCGAGCAA	19	-0.228445
NVL	GGTCTGGGCTTCATCGCGT	19	-0.228387
POLR1E	GTATTGTGGGGCGCCCGAC	19	-0.227566
EIF2B4	GGGCCTGCCTACTGGTACG	19	-0.227335
NUP54	GTCCGAGACTCTCCGACCT	19	-0.227188
EFTUD2	GCGTTTCCTCGGCGTGGGG	19	-0.225882
MCM6	GCAAATATGGACCTCGCGG	19	-0.225823
NRDE2	GAGTGCACCGCGACGGCAG	19	-0.222401
CLSPN	GGGTCAGCGGGGTCTACCC	19	-0.221838
MED1	GAGGGGGCGGGACACAACT	19	-0.220787
SDAD1	GACCCGCCGGCCTACATCG	19	-0.218719
PMPCB	GCGAGAGTCTTCTAATCCG	19	-0.218631
PRPF8	GGTGCGTGGCAGGCGTTTA	19	-0.217195
TXN	GAGCAAGGTACGCGCTACC	19	-0.217044
SNRPF	GAGGGAGACCAGCCTCGCG	19	-0.216469
IMPDH2	GGACGTGCCCCCACTAATC	19	-0.214143
COPB1	gactaggccgcttgcgtct	19	-0.213707
DSN1	GCGGTGACCGTGACGTAGA	19	-0.213142
RPL3	GCGGACCCGTAAGGCCGAC	19	-0.209184
RPL32	GGATTAACACTTACCGAGA	19	-0.207623
FDPS	GGAGTACCCGCCAACAAGC	19	-0.205909
ECT2	GGGCGGGGACGTCGACCGC	19	-0.204332
OXA1L	GCAGCCCGGTGTCAGCTTC	19	-0.204239
MRPL19	GTCCGGCTCCACTTACTGC	19	-0.203657
GTPBP4	GACCGTCTGGCCGCGTACT	19	-0.203359
PRPF3	ggtagcgacggcACGCCGT	19	-0.202398
DNAJC19	GCGCCCTACGCAACACGGC	19	-0.202266
AQR	GAAACTAAAGGACCGCTCT	19	-0.201624
MRPL39	GGGAGCGAGGCCTAGATAG	19	-0.201031
NUP160	GCGACGCCCAACGGAACAA	19	-0.201023
MTPAP	GGAGAGACGAGCAGCCTTC	19	-0.20019
CTDP1	GTCGGCGCGGGCTAGGCGA	19	-0.199425
DHX16	GCCGGCGGGTCTGGAGCGC	19	-0.197574
TAF1	GCAGCCGGGTCCCATAGAC	19	-0.197521
MIS12	GCCGGCGGGGATTGGCAGA	19	-0.197208
ATP5B	GCCTGCTCTCCTGCCGTTG	19	-0.195496
SUPT5H	GCAATCGCGAAGCGGAGTG	19	-0.193459
GART	GTCCCGGTGGGCCGACTTC	19	-0.192654
ANAPC5	GCGGCCCGAGACTAAGTCT	19	-0.192031
RPS5	GTTCCCCAAGCCCCGCTAT	19	-0.191407
CDC5L	GCAAGTCTCGCGAGATATT	19	-0.189497
PHF5A	GGGAAACGTGGCGCCTGCG	19	-0.189343
NOP58	GGGAGAGCGAGCCGTTAAA	19	-0.189136
PRPF19	GCTAGCGTAGCGCTTCACG	19	-0.187408
ZNF574	GCGTTAGGGTGGCCGTGCA	19	-0.186216
TWISTNB	GCCGGTGCGTTTCCTGTTA	19	-0.185539
MPHOSPH6	GCATGTGCGGTGAGGCTCG	19	-0.184757
WDR3	GGGGAACTCAGGTAACTAC	19	-0.183775
IMMT	GGAGGCTAGGCAGCGACCA	19	-0.182953
CIRH1A	GCACCGGGAAGGGGAGCGT	19	-0.182202
RPL6	GGTTCTTCGCCACTCTCTT	19	-0.181524
RPS24	GTCCCAGTACTTGAGCTAT	19	-0.180518
CDC27	GCCGGACGTTGGCTCGGAC	19	-0.179932
SMU1	GATCTCGCTACCTCGGAGG	19	-0.179046
WDR33	GAACTGGGAGAATCGACCT	19	-0.17672
EIF4G2	GTGGCAGCTGCTGAGTTCT	19	-0.174755
TAF2	GGAGCTAGTCGAAGGAGCG	19	-0.174187
MINOS1	GCGGTCGTGAAGATAGGTA	19	-0.174095
MED14	GGCGCAACGGCACACGATG	19	-0.174031
DERL2	GCGTACCAGAGCTTGCGGC	19	-0.173796
CD3EAP	GCATTCCCAGTGGGCGAAC	19	-0.172479
ATP5B	GGATGGACCGCCGTCGGAG	19	-0.171987
MRPS27	GGGGCCTAATGAAGCTGTC	19	-0.171891
PMF1	GCTCAAATCCCGCGAGGTC	19	-0.170845
PMF1	GCTCAAATCCCGCGAGGTC	19	-0.170845
HSD17B12	GCCATATCCGTGTCGCTAT	19	-0.169959
CSE1L	GAGCGCACCACCCGAACCC	19	-0.168578
ZNHIT6	GCCACTCTATCCTTCAATG	19	-0.166249
NUF2	GTGTTTTCGTCGTGCTCAG	19	-0.164979
AAMP	GAGTCCGAATCGGAAAGCG	19	-0.164254
LSM2	GCCCGCGCGTGGGGCGAGG	19	-0.163251
METAP2	GTTGCCCGAGAGAGCGCGA	19	-0.161711
RRS1	GCTCGGCTCACTCGCTTTG	19	-0.161474
MED14	GCCCGCTCCCGTTTCGGCG	19	-0.15917
WDR33	GTGAGTGCGGCGGCGACAC	19	-0.158143
NOL11	GGCAAGCACTCGCCCCCTC	19	-0.157989
PDCD11	GCGCGAGGTTAGTGGTAGC	19	-0.157628
PSMA1	GTGGCACCGGGCGACGCTA	19	-0.157364
DUT	GCCCGCTTACTGGGTGAAA	19	-0.156454
RPS13	GGCATCAAGCCGGATTGCT	19	-0.155336
DYNLRB1	GTTCGCTACGCGGGGCTAC	19	-0.155193
PSMA1	GGGCGACGCTAAGGATGAC	19	-0.155178
MRPS33	GGCGCTAGCCTTACTGCGC	19	-0.155063
PSMD6	GACACAACTTGGTTACGAC	19	-0.154441
MCM3	GCGCGCGGGCTCTAGCGCT	19	-0.151624
DARS	GGGCATCGGGACACGGAAC	19	-0.150896
EXOSC3	GCCGAACCTGCGTCTGTCG	19	-0.149941
EFR3A	ggcggcgcgcTGACGTAAC	19	-0.149842
SNRNP200	GGCGGTGCGTTTGGTCTTG	19	-0.149612
COG3	GCGGCGGCAGAGAACTTGC	19	-0.149416
EIF3G	GAGTCGGCGATCGCGGAAA	19	-0.145849
CWC22	GTCCGGTGTAATGGCGGCG	19	-0.142273
OXA1L	GGGTTAGTCCCCGACACTA	19	-0.140403
BUD13	GCAAGGGGTGAGTTGGTAC	19	-0.139912
MRPL10	gaggccagcgatctagctg	19	-0.138662
RPL32	GATGAATCCCGCAGGAATG	19	-0.138275
RPL21	GAACCGGACTGCGATGTTG	19	-0.137718
POLR2K	GCTGTGTAGGTAAGCGAAT	19	-0.136248
CCDC157	GGGAAGCGCGCAGCCTCTT	19	-0.13545
IPO13	GAGCCCTTCGTGGTTACGG	19	-0.13431
XRN2	GGACTCCCATAGCGGCACA	19	-0.133388
NBAS	GTGGGGGACTAGGGCCGGT	19	-0.132803
INTS9	GTCCCGCGATGCTCTCGGC	19	-0.132784
CWC22	GGGTCTTCTCGCTACGCTC	19	-0.132105
POLR2G	GGCAGGTTATTGGACGACA	19	-0.13121
CLTC	gtttcctgcgtccccggag	19	-0.131046
DDX23	GGTGTTCATCTCCGCGACC	19	-0.130786
IPO13	GACGCCTCCGTAACCACGA	19	-0.130466
MTOR	GTCGTGGGGCCGGCAATGT	19	-0.129947
EIF3H	GGAAAGATGGCGTCCCGCA	19	-0.128827
WDR36	GCTGGGATCGCGGCGGCAA	19	-0.127045
POLD3	GACTAGTTTGACCCTTCGA	19	-0.124738
RPA2	GTCACGATTCTCCGCAAAG	19	-0.124293
MRPS33	GTCAACCGATGTTTGACTC	19	-0.124185
EIF2B3	GAGGCGGGCATGTCGAACT	19	-0.119813
RFC5	GCCCGCGGCGACCAAGATC	19	-0.119075
DNA2	GCGATCCCCGCGTCCAGGA	19	-0.118797
NRDE2	GTGACGGGTTCCTAGTGGT	19	-0.118651
SUPT5H	GTCTAGCATGTGGCGTAGG	19	-0.118222
EIF3H	GAATGCTAGAAAGTACGTC	19	-0.117993
NAE1	GAAGTACGACCGGCAGCTG	19	-0.116176
C9orf114	GCTCACGCGGCACCTTCGG	19	-0.115352
HSD17B12	GAGCGAGTACGAAATACGC	19	-0.115205
CPSF1	GGCGTACATGGCGCCAACC	19	-0.114505
MRPS18A	GGTAGGAAGGAGCGCACCG	19	-0.112428
TTK	GACCGTAGTGATAGCGACG	19	-0.111361
DYNC1I2	GTGTCAGTTTGTAAGGCGA	19	-0.109089
SMC1A	GGTCGCCCGGCTTGCACTG	19	-0.10836
XRCC6	GACCGAGCGAAGCGGGACG	19	-0.106403
MRPS5	GGCTGTCCGCGGTCGCGCC	19	-0.105103
CSTF1	GATAGCGCAGCGGTCGGCT	19	-0.104892
PMPCB	GGTGTTGTCATCCGCGGCG	19	-0.103333
POP5	GCGGAAGCAAGCTTCCCAT	19	-0.101492
PSMC1	GAAGTCGTTAGGGACGCTA	19	-0.0993347
HSD17B10	GAGAAAGAGATCGGTTTCG	19	-0.0982808
RPS29	GGTAGTAGCCGTCTGAGTG	19	-0.0981282
EIF2B3	GAGTCGAGCTGACAACTTC	19	-0.0975197
HSPA9	GGCGCCTCAGCGGAAGAGC	19	-0.0962823
NUDT21	GGCACGCCGGAAGTGAACC	19	-0.0941567
LSM2	GAAGCGCGAGCCCGCGCGT	19	-0.0929091
HAUS4	GCCACACTCGAGGCGGGAA	19	-0.0918743
DNA2	GCACCGCCTCAGACTGACC	19	-0.0914488
CENPT	GAGTACTTGAGCAACTAGA	19	-0.090612
CHMP2A	GGACACCCGGGCGAGTAGA	19	-0.0891209
PSMC2	GCAGGCAAGTTAATCCGGC	19	-0.0889872
POLR2B	GTACGACGCGGATGAGGGT	19	-0.0889331
MCM3	GCGGGCATGGCGGGTACCG	19	-0.0888496
EIF4E	GTCCCCACTTGTCCGCGGG	19	-0.0886176
RPS5	GAACCCAGCGTGGTATGGC	19	-0.0867456
TCERG1	GGAGATCCGGGGCGGACGG	19	-0.0863263
PNISR	GCGGACCGCAGCGCTTTAA	19	-0.0859174
SNRNP200	GAGTACAAGGCGGTGCGTT	19	-0.0833629
RPL10A	GAGCTCCCGTCGCTCTACT	19	-0.0818505
ZCCHC9	GGCCTGGCGGAACTTGCGT	19	-0.0806253
TSR2	GCCCAATCCCTCTGTAGCT	19	-0.0787734
TSEN2	GTCAGTGACCGGGCGCACT	19	-0.0783148
CENPI	GTTTCGCACCAGGGATCCT	19	-0.0772872
RPL27A	GTTCTTAGTGGTCTGCCCG	19	-0.0754833
CHMP6	GCCCTCGGCCCCCCGCGTT	19	-0.0725612
EIF4G2	GGATCCGGTCGTCGgggat	19	-0.0712764
SMN2	GAACAGTACGGTGGCCGGG	19	-0.0701199
FBL	GGTGCCAGGCCAGAATCGG	19	-0.0696599
MED19	GAACTGCCAGGTGAGTACT	19	-0.0684861
INTS4	GGATTTGGATAATCTACCC	19	-0.0662874
NPAT	GACGTAGCCCGGCTTGTAT	19	-0.0661235
MRPL10	gtccaggcaaaagaaacgc	19	-0.0651778
NIP7	GCGGCTCTCGGCGAGGTGG	19	-0.0651107
RPAP1	GGACGGATTTCAGGTGATC	19	-0.0644706
DUT	GCAGGCCGGGCCCGCTTAC	19	-0.0633649
IARS2	GGGCGTCCCCCACAAACTT	19	-0.0630703
MPHOSPH6	GTGCCCCTACCGCCCGGAG	19	-0.0629049
AURKB	GGCAGATTCAGTTGTTTGC	19	-0.0628815
WDR36	GCAGACACAACACCGCTTC	19	-0.0622525
MRPL24	GCTAGGCCTTGGCGATGTC	19	-0.0617877
MINOS1	ggcggctcgccctggccgg	19	-0.0609254
BIRC5	GCGCGCCGCGGGGCATGTC	19	-0.0602826
MPHOSPH6	GTCGGCCTAATTCGTAAGC	19	-0.0602493
CHAF1B	GGCCAGAGGCCCTCGCCGA	19	-0.0597608
PSMA7	GTCCTGCGCTGCCGGCGAC	19	-0.0581544
SPCS3	GTGTGGAGTCCGGACTCGT	19	-0.057696
PET112	GGAGCCTCGCGGCATAGTG	19	-0.0576556
TUBGCP4	GGGACTCGAGGTCCGCCGT	19	-0.0555849
ZMAT2	GATATCTCCTCGAGATCCC	19	-0.0553521
WDR43	GTAGAGGCCAAAGCGAAGT	19	-0.0544747
TBCD	GATCTGCGAACACGTGAGG	19	-0.0540161
NUP54	GTCTCCTGCTTTCGCGACA	19	-0.0528792
CDCA8	GTCGCCAGGCACGTACCTG	19	-0.0525348
CDC26	GTGCCCCCCGGGCGTACGG	19	-0.0521532
ATP6V1C1	GCGATGGCTCTCCCCGGAT	19	-0.051818
FDPS	GCAGAATCCGCTCCGCGAT	19	-0.0509164
SNRPB	GTGGGAACCGCGACTGATC	19	-0.0496892
LTV1	GACACCCTCGAAGTCCGGC	19	-0.0493993
EIF6	GGAGGGTCAGCTCCGGTCC	19	-0.0481118
EIF3H	GATGAAAGAGAAACGTACT	19	-0.0473814
SMC2	GGGATGCAATGACGGACGT	19	-0.0466904
TAF2	GACAGAAGCTTGTCGACGG	19	-0.0462756
DNAJA3	GCGCCGCCCGGCTCTAGGT	19	-0.0459787
RFC3	GGGGAGGCCCCCCGGCTCG	19	-0.0447942
DDX27	GGAGGTATGAGCACGGTTC	19	-0.0442601
C1orf131	GAACAGATTTGAGGAACGT	19	-0.043987
SNW1	GACTAGGCCTAGTCGAAGC	19	-0.0439524
PSMD6	GCGATGCCGCTGGAGAACC	19	-0.0435693
RPS18	GATTTCCAATTCCGGAGAG	19	-0.0402662
THOC7	GCCGGGTAAACAGCCATGG	19	-0.0385664
RPS14	GTGCGGGTCCAGCCTTTTA	19	-0.0368377
POLR2K	GACAACCCGGATGGCGCAA	19	-0.0364154
CHMP2A	GACCCTGTCGTCAACATCG	19	-0.0346683
NPAT	GGCTTGTATTGGGTAAGCG	19	-0.0337888
NUP205	GCTCAATCGTCTTTCTGTC	19	-0.031739
GEMIN5	GGCGTGAGGCTACGAGCGGT	20	-0.915251
ZC3H8	GTCCGGGTTGTCACTCTCTC	20	-0.847197
PFDN2	GCGAAGATGGCGGAGAACAG	20	-0.739049
ATF5	GACTGGGGACAGATATATAC	20	-0.735038
PNPT1	GTGAGTGCCCGATCCCGCCG	20	-0.726821
MCM2	GGATCGTGGTACTGCTATGG	20	-0.722216
POLR1D	GGACCGACCGACGGAAGGCG	20	-0.714321
HJURP	GAGGCCTGCGTGTCGGAGTG	20	-0.707661
RBMX2	GAACCCGAGGAGATGAAGTA	20	-0.689263
CENPA	GCCAAGCACCGGCTCATGTG	20	-0.687702
PAF1	GCGGCCTGAGGAGACCCGTT	20	-0.68432
ATF5	GCCCTCGCGCGGCCCCAACC	20	-0.679385
WDR5	gggcgctcggggcgtcgcgt	20	-0.677768
PMF1	GAAGCAAGTAGCGCCAATCT	20	-0.667714
WDR5	GACAAGGCGGCAGCTCGGGC	20	-0.663691
THG1L	GTGGGGCGCCTGTAAAGTTA	20	-0.658987
DHX16	GGAAGATCCTAGAGGTCCCA	20	-0.656968
LSM2	GACAGCAGGGTGCTGCGAGC	20	-0.635063
NUP62	GAGGGCCACGAGCTGCGAAA	20	-0.630898
PDCD11	GCCGTGGCGCTGGTGAGTAA	20	-0.627184
POLR2H	GGTGCACGTACTCCCAACTG	20	-0.615732
GINS1	GGCGCCAAAGCGCGGAGCGG	20	-0.615063
SNRPF	GGCGCCTCACGCGGATGAAT	20	-0.614071
RPAP2	GGGGAGAGTAGTCTGCCGGA	20	-0.605841
POLR2H	GGAGGAAGAGGCTAACCTCG	20	-0.602196
SHFM1	GTCGGAGGCGGTAGTGACGG	20	-0.597755
MED21	GCGGTGCTTGAAGGTGCGGG	20	-0.594333
CENPP	GGCCGCGTGCCTCACTAAAG	20	-0.594233
IPO13	GCGGGCCAGGCCGAACGGAA	20	-0.59264
TANGO6	GGGTCCCGAGGCGGGCCTAA	20	-0.587926
C12orf60	GGCATCTTGACTTAGTTGCT	20	-0.586552
DNAJC19	GGGCGCCTGTGCTTGAGGTT	20	-0.583345
ORC5	GGAGCCTCTCCCGAGTCTGG	20	-0.581091
AURKB	GTAGCAGTGCCTTGGACCCC	20	-0.580243
NOP2	GCGAGTGCCGGCCGAAAGCT	20	-0.579904
CENPI	GGCTGCAGGTAGAGTGTCTT	20	-0.579056
SPC25	GAGTGGGCGCGGATCTGGTG	20	-0.577364
LSM5	GGTAGTAGCGTTAGCCGCCA	20	-0.569101
UTP3	GCAGCGCGCTCCCCTACCAC	20	-0.568259
TWISTNB	GGGAACCTTGACAAGCAGCA	20	-0.568155
MYBBP1A	GGTTTGTGTCGGCTCGGAGG	20	-0.5668
LSM6	GTGAGGGTTCTGGTTCCCGC	20	-0.566642
CDC20	GCCGGTCGGAACTGCTCCGG	20	-0.564018
TANGO6	GCCTGAGCGGGTCGCGAGCG	20	-0.56158
HAUS1	GCGGCTCCCGCCACTTTACT	20	-0.551444
EIF3G	GGGCCTGGCCGCGAATACCC	20	-0.548736
EIF2B3	GAGATCGCTGGGAGCGGTTG	20	-0.546611
RFC3	GCCGATACTTGTCCACCCAG	20	-0.544191
RPL14	GCCAGCGGCGAGTCCGGGAA	20	-0.532974
EMG1	GCCTCGTGAACGAAGCGGTG	20	-0.529617
MED21	GCGGTAGGAACATGGCGGAT	20	-0.528651
PHB2	GGGCCCGAACCCTCGTGTGA	20	-0.528074
CAD	GTAGGAGCCTCGGGCGCGCT	20	-0.526356
RPL9	GGATGTTTCTGTGCTCGTGG	20	-0.52374
NUP62	GAGCTGCGAAAGGGCGGGAA	20	-0.52093
RUVBL1	GGGCCAGGAGAACGCGCGAG	20	-0.520181
GNPAT	GGCTTCCGTCCTGGCTGAGA	20	-0.520169
RPS27	GCCACCCGCATAGACGGGAG	20	-0.517544
ANAPC4	GTGGGGACTCTTGCAGGTAC	20	-0.517506
NUDT21	GGCTACTGCCCGCCATTAAC	20	-0.516729
RPL9	GCTGCGTCTACTGCGAGGTA	20	-0.516227
RPS4X	GCTAACTAAACGGCTTACCA	20	-0.515116
NIFK	GAGCGCCGCGTGGTTAGCGT	20	-0.514242
CASP8AP2	GAAAGGAACCGGGTTGTCTT	20	-0.513663
UTP15	GTGTGTCGCCGGCTCCTTGA	20	-0.513638
LTV1	GAAGTCCGGCGGGGAGACCA	20	-0.513023
LSM6	GGCTCCGGGAAGGGACCGCT	20	-0.508142
CCDC174	GCGACGGAGGTAGGCTTACG	20	-0.506532
RPL4	GGGGAAGGTGACATATACAG	20	-0.504087
LSM5	GGCCTGCCTTCATTGATGGT	20	-0.503582
TONSL	GCTCGGATCGCCGCGGGATC	20	-0.502305
MTHFD1	GAGTGGAACCTCGATATTGG	20	-0.501178
BCCIP	GCGGCGTGCCGTGGAAAGTG	20	-0.493668
ACTR10	GAAGAGGGTCGCAGTCTCCG	20	-0.493553
MRPS33	GCGAGCTTGGAGCCGGGTAG	20	-0.493473
NVL	GGAGCTGGCGGTCCGAGCTG	20	-0.492419
SNRPD1	GGGAGTGACCAAGCAGCTCT	20	-0.490101
FARSA	GAGCACACTGGAAGGAGTCA	20	-0.489845
ATR	GCCGGGAACCCGCGTTGGCG	20	-0.488204
LSM6	GAACACTGGGGCACCGAACC	20	-0.487703
SLMO2	GGTAGCGCCAGGGGACAACG	20	-0.487649
NRDE2	GGGAACAGCGCCATGACCAC	20	-0.486618
RPL31	GGACGCTGCAGAGTGAGTAT	20	-0.48326
RPAP2	GCCCAGCGAAGTCCGCCATG	20	-0.481649
EIF3A	GACGAAGGGGAACCAGCGTA	20	-0.479374
SUPT6H	GATAGTACGGACCCACCGCA	20	-0.479111
RPL39	GGACTTACCATGGCGAGCAG	20	-0.477303
RPP40	GGAGGCGCCGCGGCACTTAC	20	-0.475463
POLR2H	GCGCTTTCAGGAGGTGCTTT	20	-0.473369
AURKB	GGTAGGGACGATAGCAGGGC	20	-0.473011
HAUS7	GACGACTACTCAGAGGACGA	20	-0.472127
DCTN3	GGGTCGGTAGTAGCGATGGC	20	-0.471285
TTC1	GAGGTTGTGAGTAACCCCGT	20	-0.471194
RPS23	GCCCGTGGCGCCGACAGGAT	20	-0.470332
UTP15	GCTGCTGAACTGTGCAGGGT	20	-0.468015
TREX2	GCGGCTCGGAGCGCGAAACA	20	-0.467905
RPAP2	GCCTTGCGGCCGGCAGAAGA	20	-0.467017
CHMP3	GCTTTCAGTTCCCCGCGCCC	20	-0.463443
GATA1	GGCAAGCTCAGTGTGATCCC	20	-0.461311
CLNS1A	GTGCACCACACCGCCCGCCC	20	-0.460074
OGDH	GAGGCGCCGACACCCCACTC	20	-0.460072
NUF2	GAGCGCGAGAGGACGGAGGA	20	-0.4593
TXN	GCCCGGCGTGCGTGTggcgg	20	-0.458562
BUD13	GAGAGACCCGCCAAGAGGGA	20	-0.457988
MED30	GTCGCTGTGCCGCATCGGGC	20	-0.457525
MRPS5	GGCCGGGGTGAGGGACTGTC	20	-0.45747
DYNC1I2	GGCTGCTACGGCGAGAGCTT	20	-0.457051
IARS2	GCGGAGGACCCCGCTCTCAG	20	-0.45379
RPL26	GCCATCACCGAAGCGGGAGC	20	-0.453446
MRPS2	GTCGCCATGGCTGGGACGCG	20	-0.452656
IMMT	GTGGACTCGAGCTGCCGCGG	20	-0.452051
BDP1	GCGGAACATGGCGGAGGCAG	20	-0.451446
PRPF3	GAAGTTTGTGAGGTGAGTAG	20	-0.450947
SNRPD1	GGATGAAGCTCGTGAGGTGA	20	-0.448804
RPL12	ggggcggcgcaacACCGGGA	20	-0.448441
EIF2B3	GAGGCGGCGTGGAGATCGCT	20	-0.447595
NPAT	GGAACCAGGAGATGCGGCGC	20	-0.447263
RPS4X	GGGACGGGCTCCAGGGCGAA	20	-0.446568
KANSL2	GCGAGCGGCGCGGCAGAGTG	20	-0.446449
BIRC5	GCGGGACCCGTTGGCAGAGG	20	-0.446184
RPS19BP1	GCCTCACACTACTTCCGACC	20	-0.444527
CENPT	GTTGTGGTCAGCCATCGTCT	20	-0.443331
METTL16	GCGGCTGCTTTAAGATTCTA	20	-0.441844
DBR1	GCGATCAGTCGGTCCTGGGC	20	-0.441552
NOC3L	GCCGCGGCCTAGGGCCCCTT	20	-0.441045
POLR2G	GGTGGATTCCCAGGGACTGT	20	-0.438339
DKC1	GCCTGACGGGACCAAGGCGG	20	-0.437541
LSM6	GGTTCTGGTTCCCGCCGGCG	20	-0.437249
TTI1	GAGAGAAAGGCTGGAAGACG	20	-0.436397
WDR3	GACTCACCTCAGCCTCCACG	20	-0.434771
CHMP6	GCGGCCGAACAGGTTACCCA	20	-0.434436
DBR1	GTGCTGCGGCGACTTCCAGG	20	-0.43406
MNAT1	GTCCCTTCGCGAAAGAGCAC	20	-0.433522
GART	GGTCCCGCGCCGGTCCCGGT	20	-0.431936
SMN2	GCTATGGCGATGAGCAGCGG	20	-0.431873
SUPV3L1	GGCACGGGAGAAGGACATCG	20	-0.431842
NOP2	GAATCTGACGAGTTCTGTCT	20	-0.431324
NUDT21	GGCGGGCAGTAGCCGCTGAG	20	-0.429806
LSM2	GGCCGGACCGGGAAGACAGC	20	-0.429287
TPX2	GGCGAGGCTAGGTGAGCCGT	20	-0.426111
METTL16	GCCGACTTCGGGGTCTAGGA	20	-0.423831
GFER	GGCGAGCGGGGCCGCTTCCA	20	-0.423468
EIF2B4	GCGGGGCGGCTCCGTGACCA	20	-0.422582
C12orf60	GACGGTCCTGTCTCTCGAGT	20	-0.422408
MED30	GCACTGTCTCCTGCCCGATG	20	-0.422199
USP39	GATGTCCGGCCGGTCTAAGC	20	-0.420973
RPS13	GCGTGTTGGGTGGCTTCCTG	20	-0.420057
MRPS2	GACCCGTTAGGGACGCGGAG	20	-0.419508
PRPF8	GCGCAGCAGAAAGGCGTCCG	20	-0.419466
PSMA3	GGAATCCCTACGCGTCCCTT	20	-0.417653
TRMT10C	GTCTACACAGCCGACCAGAG	20	-0.417476
TP53I11	GGCCCTGGGCCGGAGAACCC	20	-0.416541
PDCD11	GTAGCTGGGTGCAGACGCCG	20	-0.416324
NUDT21	GTTATCTGCAATCCCCTCAG	20	-0.413199
GPN3	GCGCGAAGGCTAAGGGAGTG	20	-0.413175
EIF4E	GGGCCAAAGGCAATACTCAC	20	-0.411824
SNRPB	GGCCTCTGAGGAGGCGAATC	20	-0.411348
EEF1G	GGTAAGTTTGCTGGCTCTGG	20	-0.410954
CPSF2	GACTAGCGGCGGAGACGAGG	20	-0.410636
PDCD11	GTACCGCGGCGCGAGGTTAG	20	-0.409624
TUBG1	GCCGCACTGGCCCAACTGTA	20	-0.409262
PARS2	GCAAGCGCGCTGGCCCGGCA	20	-0.408706
AARS	GGGGACGGCGACCCTAGGAG	20	-0.407945
DYNC1I2	GGGATGGGCGGCGGCTGCTA	20	-0.407343
CENPC	GCCAGCGCAACTGTCTGAGG	20	-0.406836
ATF5	GCCCTCTCCTTGTGGCTCCG	20	-0.405445
PSMD4	GCCGTCCCGGAGACCCGGTC	20	-0.404912
SNRPD1	GGCGCATGGCGGAAACGCCG	20	-0.40489
EIF3E	GACGGACACTAAGGATCTTC	20	-0.40274
WDR36	GTTCCACTAGACACGCTGAA	20	-0.402696
MIS18BP1	GCTTGGCGCCTGGCCGCCGC	20	-0.402091
MCM6	GCGTGGCGCAGGCGAATCCT	20	-0.401941
MTHFD1	GGCGCAGTAGTGTGATCCCC	20	-0.400525
RPL17	GGTCCGCAGAGGGACGTGAT	20	-0.400076
MYBL2	GCTGGTGAGACGAGCCGGGA	20	-0.399885
EEF2	GGATGGCGGTGGATTCTCCC	20	-0.399483
SRRT	GAGACGGAGCTCTTGAGTAG	20	-0.399331
NOP2	GACCCTACGAAGGAGAAGCG	20	-0.396423
UTP6	GTCCGAGGTCTACAACCCCG	20	-0.395983
RPL6	GAGAGTGGCGAAGAACCGGA	20	-0.395785
AARS	GAGGGCGGCCTACCTCTCCT	20	-0.395342
DNAJC17	GTCCATCTGTAAGAGCTCCT	20	-0.394118
RPL19	GGCCCGGGACGAAAGTGCTC	20	-0.392653
SF3B2	GAAGCGGAGCCTGGTTACCC	20	-0.391801
CDCA8	GGAGCCATGGCGCTCGGCGG	20	-0.391208
TTC27	GCGGCCATAACAGCAGCGCG	20	-0.390654
CDC5L	GTAAGGCGCTTTGGCCAGAG	20	-0.390456
THOC7	ggcggcggcgcaagctgagg	20	-0.390124
TUBG1	GCGTCTTGCGGCGAGCGGGC	20	-0.389232
RPL6	GGTTCGGATGGCGAAGGATT	20	-0.388184
HMGCS1	GCTATAAAGCTGGTGGCGAA	20	-0.387999
POP5	GCACGCCGGACCGGAGAGCG	20	-0.387705
PSMD6	GCGGCTGACAGGACACAACT	20	-0.387147
C3orf17	GGCACCGCAGCCATCATGCG	20	-0.386663
TBCD	GGCGCGGCGCTGGAAGCGTT	20	-0.38593
RTCB	GAAGCCGGACTACGCGGCAG	20	-0.385528
EIF3H	GCGTCCCGCAAGGAAGGTAC	20	-0.383419
CENPT	GTCAGCCATCGTCTCGGCCC	20	-0.382883
RCL1	GGGTAGACAGGACCAGACGT	20	-0.382669
ESF1	GTTGAAGAGCTCGAGATGAA	20	-0.381913
CWC15	GCCCCTAGCCCGCTGCTCCA	20	-0.381742
NVL	GCCCCCGGTTGACTAGGAGC	20	-0.381646
RBM8A	GCTCAGACACTAGGTACCTC	20	-0.381539
C14orf166	GAGAAGAAGCGAGGTGGAGC	20	-0.380355
POLR2I	GTTCACGGTTCTTCCAATAG	20	-0.380293
UBA1	GCGGCAGCGGCGATTCTAGG	20	-0.380153
HJURP	GGTACGCTGCGCGCCATGGA	20	-0.37948
ESF1	GACGGTGAGTGGGGATGGAC	20	-0.379459
DCTN3	GCGCTCCAGCTCTTCCACTC	20	-0.379261
NUPL1	GGACCCGAAGGAGAACCCTG	20	-0.378897
GEMIN5	GTAGCCTCACGCCTTAGGTA	20	-0.378634
TAF8	GCTTCCTGCCCTTACCGTTC	20	-0.377921
PSMC4	GGAGGAGATAGGCATCTTGG	20	-0.377696
COPZ1	GGGCTTCCTACTCTAAACCA	20	-0.375267
PSMA1	GGCTCCCCGGGAAGCGAAAG	20	-0.374502
SDAD1	GACGCCGGTGCGGGAAAGCA	20	-0.373659
ATP6V1B2	GGGAGCAAAGGGCTAGGCTA	20	-0.373283
RPL5	GTTCCCAGCGTGGCCTTAAA	20	-0.371293
RPL7A	GTGAGTGAGCTGTAGTTCCG	20	-0.370992
SEC61A1	GCTGTGCAGTGGAACGCGCT	20	-0.370805
TICRR	gggcggcggcACGGCCGATA	20	-0.368676
RPL30	GGCCCGGAAGACGATTCACG	20	-0.368342
GNE	GCCCGAGCGCGGAAACCGAG	20	-0.368147
TBCD	GGAAGCGTTCGGCGAGAGCG	20	-0.367613
AQR	GCTGTTGTACGGGTTCCCTA	20	-0.367434
EXOSC3	GTGTTTGGTGGAGCCCGCGA	20	-0.366622
RPS6	GAAGTTGGCCCTCTTTTCCG	20	-0.366315
RPL39	GGCGGAAGAACGAGCTTAGA	20	-0.365715
RPL6	GGATGCCCTCCAGGTTCGGA	20	-0.365374
DNAJA3	GAGGCCCACCTAGAGCCGGG	20	-0.364863
TPX2	GCTTCGGGCCACGCTTCTCT	20	-0.36462
RBM22	GTAGCTGTAGCTTCCGAATT	20	-0.364026
ZC3H8	GTTGTTACTCTGTAGCTTCC	20	-0.363893
RPS29	GCCATTACAGGCCTGTACTG	20	-0.361899
VPS35	GACCGCGGGAGGCTACGCGC	20	-0.361413
EFR3A	GGAACGAGGCGAAGGGCGAA	20	-0.360218
CSE1L	GGTTTGAATGTGAGGCGGAG	20	-0.36006
NIP7	GACCGCGGCGACTATCCCAT	20	-0.359898
ORC5	GACGGAGCCTCTCCCGAGTC	20	-0.359415
WBP11	GCCGCTGCGCGGGACGTGGA	20	-0.359215
RABGGTB	GCGCTGCTGTCCGGATGGGT	20	-0.359183
SPC25	GGGAAAGTGAATTTGAGGGC	20	-0.358739
SPC25	GGCTAGAGTGGGCGCGGATC	20	-0.358621
NOC3L	GTTTCCGGCTCTGGTAGTGT	20	-0.35837
TTC1	GCCAACACGCTTAGACCCAC	20	-0.358036
GNE	GAGGAGCGCGGTGGCGGCGT	20	-0.357964
DYNLRB1	GCTACCGGATCGGTCGGAAA	20	-0.357553
TANGO6	GGCTCAGGAGACATGCGGTC	20	-0.357081
POLD3	GGAGCAAAGACGTTTCCCGC	20	-0.356295
HSD17B12	GAGAGCGCTCTCCCCGCCGC	20	-0.355911
DHX8	GCGCTCAGAGCTACTCCGGC	20	-0.355811
PDCD11	GTAGCAGCCCCTGTAACCCC	20	-0.355534
MED17	GGTTTCCCGAGGGTCTTCTG	20	-0.354022
AQR	GATCTTCTTGGGCTGCGCAG	20	-0.353712
NOP10	GACTGAGCGGTGGACCGAAT	20	-0.353507
WDR5	GCTTACCTgccgggccgcgg	20	-0.352814
WDR75	GGAGGAGGAGAACATCCGCG	20	-0.352093
PRPF19	GCTAGCGTAGCGCTTCACGT	20	-0.350866
COPB2	GAGTAGCCGGTAACAAACGA	20	-0.350393
CDC5L	GAGAAGTAGTAACAGCGATT	20	-0.35038
TSEN2	GGCCGGCGTTGCCGGGGTAA	20	-0.349353
HAUS5	GGAGCTAGCGCAGGAAGCGC	20	-0.348804
USP39	GCGTCAAGCGGGAGCGAGAT	20	-0.348072
GART	GGGGTTTACGCACCGACACC	20	-0.348034
SNRNP48	GCTGCAGCCCACCCGCCAAG	20	-0.347482
UMPS	GCTTTGGGGCCATTGGTGAC	20	-0.346746
DARS	GGGCATCGGGACACGGAACT	20	-0.346727
RPL34	GGCTTCCTCAGCTCCTCGGA	20	-0.34669
RBMX2	GCCACTGGGGGTGGTCCACC	20	-0.346584
UTP6	GAAGCTCCCGGTTTCAGGTT	20	-0.345985
RPS4X	GAGGTTTCGGGATTCCTACT	20	-0.345314
CDC26	GGTAGGTGAGTCGACTCGCG	20	-0.345312
NRDE2	GCCATCCCTATAGAGAAGAA	20	-0.344694
DDX23	GACGTTGAGGCCGCGTTGGG	20	-0.344508
TCP1	GCGATGTCCCAGGAGCTACT	20	-0.343742
COPB2	GGCTGCGTCGGTCCAATCCC	20	-0.341692
PMF1	GCCAACAAACACTCCCACCG	20	-0.341684
PMF1	GCCAACAAACACTCCCACCG	20	-0.341684
CHMP6	ggcgcggccgccgTAGCGGG	20	-0.341682
RRS1	GGCCCTCCATGGCTCCGGCT	20	-0.340401
ATP5B	GGGTCGGGTGGCCGCTGCTC	20	-0.339605
TOP2A	GGGCGGCCAGAGAGATGCCC	20	-0.339373
RPL15	GTTGAGCGAAGATGTGATGG	20	-0.339016
RPS27	GCCCCCACTGTCACACACCG	20	-0.338805
TRAPPC5	GAGCAGACTGCTGCGGTTCC	20	-0.337988
EEF2	GAGGATGGCGGCGACGACGG	20	-0.337915
DYNC1I2	GGAGCGACCTCGTTCTGGTG	20	-0.337884
NBAS	GCTTGGCGCGGGCGCTTCGT	20	-0.336947
MED12	GGATCTTGAGCTACGAACAC	20	-0.336335
RFC3	GTGATAGTCCAGCCGTCCCA	20	-0.335785
MED18	GTTGGCTGGTTGCACCGATC	20	-0.33535
EEF1G	GGCGGCTGGGGTAAGTTTGC	20	-0.335217
ATP5B	GCTGGGGGCAGCGACGCTGA	20	-0.334689
HAUS4	GCAGGTTTGCTTTAGAGGGT	20	-0.333925
NUBP1	GGTGACCACGAAGGCGGCAA	20	-0.333595
MRPL39	GACGGTTCTCACCGCTGCTA	20	-0.333254
NLE1	GCAGCTGCCCGCCCTCATCC	20	-0.332196
CENPC	GAACATGGCTGCGTCCGGTC	20	-0.331885
DYNC1H1	GCGGACGGTCCGGCTTCCGG	20	-0.331661
RPS4X	GTGCGCGTAGAAATTGGGGC	20	-0.331161
EIF2B4	GTGGCCGTGGCTGTTCGCGA	20	-0.330014
HMGCS1	GCCGCCAACCCACCCGACTC	20	-0.329401
SAMM50	GGCAGAAGGCGGGTCCGCGG	20	-0.32801
TTC27	GGCTCCCACGAGGGCCACAC	20	-0.327555
ADSL	GTAACGGATCCCGGGCTGAG	20	-0.326596
ANAPC4	GGCGCGGTCGGGGCTCCTCG	20	-0.326422
GEMIN5	GCTGCAGCGATGCCGTGCCC	20	-0.326194
OGDH	GTGTCGGCGCCTCATTCGGG	20	-0.325696
MRPS5	GCGACCGCGGACAGCCCCGC	20	-0.325398
NOP58	GGAGAGCGAGCCGTTAAAGG	20	-0.325013
NCBP2	GCTGCGCAGCGACTCCTACG	20	-0.324567
POLR2A	GCCGGGACGGTTGGAGAAGA	20	-0.324227
CTNNBL1	GGGCCGGGTACCATGGACGT	20	-0.323894
CPSF1	GAGCCGACTCGAGAGGAACC	20	-0.322986
EBNA1BP2	GACTCCGAATCCGAGAGCGG	20	-0.322457
ZCCHC9	GTGCGCGGTAAGAAGCTGCG	20	-0.321155
DYNC1H1	GGGAGCCGGCTCCGCCCTAA	20	-0.321051
MRPL35	GCCATCTTCACCTTCGCCTA	20	-0.320946
PAF1	GGGGACGCCTGATCCGAGGA	20	-0.320018
MED18	GCTTCCCGGGCTCGGGTAAC	20	-0.319713
TRMT10C	GCTGCGTGCTAGCTTCGGCG	20	-0.319372
DDX23	GGCATGAACCCGGGAAGCTC	20	-0.317938
POLG2	GCCTCTCCGGATTCTGTTAA	20	-0.317374
MED19	GGGTACGATGGAGAATTTCA	20	-0.317265
PDCD11	GCTTCGAAGCGGGGCTAAGG	20	-0.316938
SNRPF	GTGACTACAGCAGGTACCGC	20	-0.316907
GART	GTTTACGCACCGACACCGGG	20	-0.316638
GPN2	GTCGGAGCGGCCCCTGCCAT	20	-0.315701
KIF23	GAGTACGAGGCCGCCGAGCA	20	-0.315636
TOP2A	GACGCGCGTCTGTGGAGAAG	20	-0.315095
ARCN1	GCCTCACCGTCTCTCCTTGT	20	-0.314125
PMPCB	GCGCCACAGATCCGAACAGT	20	-0.313897
POLG2	GACCTTATGGCAGGCCCTGA	20	-0.313331
CDC23	GGGCCACTCCAGCCAATCAT	20	-0.313242
VPS13D	gccgctcggcccctacctgt	20	-0.313089
MRPL34	GGTCCCGCAGTACCGGCTGC	20	-0.312996
MED12	GTAGCGCCGGAGGCACCAGC	20	-0.312233
COPB2	GGTAACAAACGAGGGTTCCC	20	-0.311728
COPB1	GCCCACTACCAGGCTCCGAG	20	-0.310226
PSMA3	GACGCAGGCCTAGCATATAG	20	-0.310055
XRCC5	GCGCTTTGGTCGCTTCTTCC	20	-0.309948
MCM4	GGCGCGCGGTTACCGTGGAA	20	-0.309328
SRBD1	GGAAGGTGCGGTGGCACTCA	20	-0.30914
NOL6	GAGCAGCTTCGCGGAGCGAC	20	-0.309111
CTDP1	GCTAGGCGACGGGTGGAAGC	20	-0.30906
DDX27	GTACTTGCGCAAAGACGACG	20	-0.30844
MYBL2	GACTGCAGTTCCTGCGAGCG	20	-0.308049
MRPS5	GCGCACCGCGGTCGCCATGC	20	-0.307521
NDUFAF5	GCCTAGTTCGCTTGCCATTA	20	-0.307336
NUBP1	GCGGGTTCCGGTGACCACGA	20	-0.306545
RIOK2	GAACGGCGGGTTTCTTACCG	20	-0.306219
RPL23	GAAGTCGATTCAAAGGACAC	20	-0.30584
HSD17B12	GTCATCCTCACCGTCACGGC	20	-0.305763
REXO2	GCACCGTACGCTGGGACGTG	20	-0.30381
EIF4G2	GAGTCGGAGCTCTATGGAGG	20	-0.303739
SEC13	GCTGCTCCAGGTCTCGGACG	20	-0.303063
RPL7A	GGAACCTGGCTATAGTGCCA	20	-0.30285
DDX21	GTCTTCTCAACCGCGTGGAG	20	-0.302681
RPS20	GGCAGATGCCGGGGCGTGTA	20	-0.302583
CIT	GAGCCGAGGGGTCAGCCGAG	20	-0.302518
CCDC174	GGACCCTTTCTACCCGACAC	20	-0.301954
CDC27	GGCCACTCCGCGGCCTGGTG	20	-0.301091
EFTUD2	GGTAAGTTGAAGCGGGTCAG	20	-0.300983
PLRG1	GTGCAGCACCTTCCGGAATT	20	-0.30021
NUP205	GTCAGCCTCACCCTTTCCCG	20	-0.299875
RPL10	GCGCCTCTTTCCCTTCGGTG	20	-0.299667
LSM2	GCGCCCTCGGGGACCTCGCA	20	-0.298856
SPCS3	GCACACCCAGGCTCCCGTTC	20	-0.298272
GPN2	GGTCTCAGCTGTTCCGCCTG	20	-0.298014
CCT4	GTGTCTGGGTTGGCTCGGGA	20	-0.296911
EIF3H	GGAAGAGGTGGCAGTAGAGC	20	-0.296903
XRCC5	GCACCATGTTGCCGGTCCTC	20	-0.296529
NKAP	GCGGCAGGTCCCGGGAACCA	20	-0.296296
CDC27	GACGTTGGCTCGGACGGGAA	20	-0.295373
NKAP	GACCGCCTAGATCCGGGGAA	20	-0.295008
MED12	GCTGACTGGGGGAACGGGAA	20	-0.294567
SCO1	GCAATAGCCAGGGCGCCCCG	20	-0.294498
SNRPD1	GTTAGCAGGCCGCGCACACG	20	-0.29431
PFDN2	GCGCCGGCCGGAAACCCAGC	20	-0.293336
UBA1	GTGTCGGCGGCTCGGCTGTA	20	-0.292851
CASP8AP2	GCGGCCAAGTAGGTCGGGGA	20	-0.29253
SNW1	GCGCGAGCGACAGCACCGCT	20	-0.292346
TIMELESS	GAACGCGGCGCGGGAGACTA	20	-0.292248
CHMP6	GCCGCCATGGGTAACCTGTT	20	-0.291225
NAA25	GGCGACGCGGGGCCATGTGC	20	-0.290907
RPL39	GAAGCCACCCCGGGGCCGAT	20	-0.290586
XRCC6	GCCCGCTTACCTTTGGCGCA	20	-0.29057
EFTUD1	GTCAGAGACGTGCGGGTGAA	20	-0.289162
NDUFAF5	GAGGGAACGTGCAAGTAGTT	20	-0.289093
CPSF1	GTACATGGAGAACTCCAGAC	20	-0.288462
DHX15	GTGTGGGCTGTAGTAGCGGG	20	-0.287863
AQR	GTAGGGGCCACGATCTTCTT	20	-0.28781
CHAF1B	GACGGTGCCTCTGACTGTCC	20	-0.287655
RPL15	GCAGGGTCCCCGGACCTGGA	20	-0.287233
PRPF3	GGCCGGGGACTCAGTCCAAG	20	-0.286152
VPS54	GGAGGCGGCGGCGATGCACT	20	-0.285649
GTF2H4	GGAGGATCGACAGAGTGGTG	20	-0.285403
SRRT	GGACTTCGAGGAGGGCGAGA	20	-0.284974
PSMA1	GCTGACCGAGGAGGAAGTGT	20	-0.284468
TICRR	GGACTAAGGGACGGTggcgc	20	-0.283974
TUBGCP5	GTGCCTGTCGCGCGAGAGCT	20	-0.283387
TUBGCP4	GCACAAACCGCCCGACCCAG	20	-0.283326
AQR	GTGTAGCCGGAAGTTCATGC	20	-0.282606
SKIV2L	GCTCCACGGCCCGAAGGGGT	20	-0.282579
CWC22	GCGGCTAGGTCCAAGCAGGT	20	-0.281725
ATP6V1A	GGCGACCGGTAACTGGCGAG	20	-0.281313
MIS18A	GCCCCGCGCATGAGCAGCGG	20	-0.281212
COG3	GCTGCTGAAggccgcgaggg	20	-0.280598
SNRNP200	GACGCAGGAAAGACGCACTG	20	-0.279968
PAF1	GAGGGGCGTGCCGACTTCAG	20	-0.279749
RUVBL1	GGGCGCACTGTCCTAGCTGC	20	-0.278884
RPL19	GCGTCGCAGCAACTGAGACC	20	-0.278227
NUP54	GTCCGAGACTCTCCGACCTG	20	-0.27814
DARS	GCCGCGTCCATGATCTCCCG	20	-0.277058
RPL3	GCCGACCGGCCTCTACCGGC	20	-0.277048
TRAPPC5	GGGGTGGGTAGGGTCTCACC	20	-0.276948
MIS18BP1	GCCGCGGGCAGGATACACCG	20	-0.276663
NOC3L	GAAGTGGTGCGCGCACACAG	20	-0.276227
NOP58	GTCCTAGTTCCAGTACAGCG	20	-0.275982
SEC13	GCCGCAATCATGGTGAGTGT	20	-0.275316
MRPS35	GCTAGGTGTCGGGACCGGAG	20	-0.2749
WDR33	GCTCTGGGGTCATCACGCAC	20	-0.273479
GTF2B	GGCGGGACATACTAACCGGC	20	-0.273257
PSMA1	GGAAGTGTCGGAGGCTCCCC	20	-0.273095
DNA2	GAGGCAGGCCCCGACTCCGG	20	-0.272968
SCO1	GGACGAGTTATGCGGCCTCT	20	-0.272793
CLSPN	GCCTCCCCTGCGCTCCACTA	20	-0.272513
COG3	GGTATTGGAGCTGAAGGCGG	20	-0.272254
SNRPG	GGCTAACGGAGAGGGAACCA	20	-0.271948
TPX2	GCTCGGTCGCCGCCTAGGCG	20	-0.271923
TUBGCP4	GGAAGTTCGGCAGCTCAACG	20	-0.271907
WDR33	GGCCACCGAACGCACGCTCT	20	-0.271705
RPTOR	GCCTCAGCAGTTCCGAAGAC	20	-0.271047
MINOS1	gccccggcgggAGGTCACTC	20	-0.270643
ZNF574	GGCGACGGCGAGAGCTAGAG	20	-0.270358
CEP192	GCACCGGCTGGAGCCCGGAA	20	-0.269916
SUPT5H	GCCTGCCGGAAGCGCCCTAA	20	-0.269818
MED21	GGAGCAGACTCTTTCGCTTG	20	-0.269796
WBP11	GTGTCCCCCAAGCCGCTGCG	20	-0.26974
COPB1	GTAGACGGAGCCGCAGTAGA	20	-0.268373
CDC27	GGTCGGGAAGCAGCAGCGTA	20	-0.267487
UTP3	GGCGGCGCGGAGCAGCTAAG	20	-0.267326
NUDC	GCCGGCTCCGATCCACGTCC	20	-0.267322
HSPA9	GGCTGCGGCGCCCACGAGAC	20	-0.266679
ECT2	GAGAGGTGCAAGTGGGCGAG	20	-0.2663
NAA25	GGCCGGAGGCGCCTGTCGTT	20	-0.266189
VPS13D	gggcggcccgggacaccgac	20	-0.265986
TAF2	GGCTTCTAGGAGCTAGTCGA	20	-0.265666
PET112	GCAAGAACCACCGTCAACCC	20	-0.265173
EIF2B5	GCCACCAGAACTGCTTGTAG	20	-0.265069
RPLP2	GGCGGGCGGAGAGGACGCGA	20	-0.264965
GTF2H4	GAGACTCGGGGTGCGCGAGG	20	-0.264821
RTCB	GGCCGGGGACGGAGCACGGA	20	-0.264771
MRPL34	GTCTTGGCTGGATCCCTGTT	20	-0.264588
CWC22	GGCGGGTCGCCGGATCGGGT	20	-0.264405
WDR3	GTCCTGGAGGTGCGTGGTTG	20	-0.2644
MINOS1	GCGGTCGTGAAGATAGGTAA	20	-0.263507
RPA1	GGCGACGGGGGATGAACGCG	20	-0.263174
BMS1	GCGAGCAGGTTCGGTGCTGC	20	-0.26309
NOP2	GCGCAAGTTGGACCCTACGA	20	-0.262989
WDR36	GAGAGGAGCTGGGATCGCGG	20	-0.262452
CENPT	GCGGCGTGGAGTCGCTGTCA	20	-0.262067
ZNHIT6	GGCTGCTGCACACCAATAGG	20	-0.261996
SPC24	GCGTGGTCGCGGGCCCACGG	20	-0.261893
MRPS14	GTTTGTAGCGGACAACATGG	20	-0.261373
RFC4	GCGGGAACTGAGGCGACTGT	20	-0.261248
INTS3	GCCTCACCCTCACCCCCTAG	20	-0.261205
TAMM41	GCCATGGGGTCGAGGCTAAC	20	-0.261125
PSMC2	GAGCGGAGCTGCCTTGGCAC	20	-0.26073
GTF2B	GTGCCTTTGTCCCGGCCCGT	20	-0.260424
CAD	GTCGACACGGCGGCCCCAAA	20	-0.260108
NUP54	GCGGTACCGGAGGTGCCCGA	20	-0.259473
CHAF1A	GGCGCCAGGGGAGCCGCCAC	20	-0.259293
SRBD1	GGGTCTTCTGACGTGCCGGG	20	-0.25886
NSRP1	GCTCCCGTGTCCGCTGAACG	20	-0.258762
RPS15A	GGTCTCGGTGTCCTGCGAGG	20	-0.258538
TRMT10C	GGTCGGCTGTGTAGACTGTT	20	-0.258161
MINOS1	GAGAGGCCTGACCTCCCGTG	20	-0.257275
TANGO6	GGCGCACGCTGCGGAAGGCA	20	-0.257129
RPL17	GCCATACTTTCCCCCACCAA	20	-0.257046
PSMD7	GCGCCGCCGGCCCAGCTATA	20	-0.255958
DBR1	GATCTATGAGACGCTGGCGC	20	-0.25587
POLR2B	GGACTGTGCAGCCGGCGCAT	20	-0.25533
MED10	GGAGCGTAGGGCCACGCCTG	20	-0.254413
RPL32	GAAGGGACGGTGGCGCGCAA	20	-0.254258
RPL31	GCGCAGGGGCGCGGGTGCGT	20	-0.25387
HSPA9	GCAGCAAACAAGCGCTCCGA	20	-0.253534
SNRNP200	GTACTCGTATTGCAGACTAC	20	-0.253509
RACGAP1	GTCTGCCGCTGGATTGTGAT	20	-0.253501
SLMO2	GAGATGTCCGGGTAGCGCCA	20	-0.253382
CSE1L	GGCCGCTCGCTCATGCGCTC	20	-0.252798
INTS4	GCGCCGCCATGCCTACCCGC	20	-0.25244
CDC23	GTGTTCCAGGTCGGCGGAGT	20	-0.252004
SNRPD1	GTCGGTCAGTGTTCGGTTGA	20	-0.251895
TTK	GTTCTGTCTTACCGGTGCAC	20	-0.25142
MED21	GGATCGGCTCACGCAGCTTC	20	-0.251194
NUP205	GACGCGCGCCATTCAAACTG	20	-0.251115
RPA1	GAGCTGTTGCGGGGTCCGCG	20	-0.251101
SSBP1	GCTGCTCGGGTTAGATCGTC	20	-0.251052
SMC2	GGCAGGTGTTGTAGCCGCTA	20	-0.2503
RPL30	GAGTGGGCTCCTACCGACCG	20	-0.25002
ATP1A1	GAGCACCGCCACCATGGGGA	20	-0.249077
AARS	GGGCTTCTCCAGGCCACGCG	20	-0.249061
VPS35	GCCGCCCCGTCTCTCAGCAA	20	-0.248825
CLTC	gagagccgcaatggcggaac	20	-0.248824
SARS	GATGTAAGTACCGGGACGGG	20	-0.248689
MRPS35	GACAAGCGGCGTTCAGTGTC	20	-0.24786
DHX8	GCCTGGCTCCGACCCGATTA	20	-0.247853
RPL32	GGGGAGGCCTCCGCACCACT	20	-0.247635
POLR2I	GAGCCCTCTTCCTGGCGGTG	20	-0.246484
RPL21	GGTTCCGGCCGAAAGGAAAG	20	-0.24571
RPS14	GCCCCCCGATTGTCGCGCCC	20	-0.245574
EIF2B2	GACCACCGCTGGAGCAACGC	20	-0.244785
RACGAP1	GCTGTCCCGGACCCCCGCGG	20	-0.244551
TTC27	GCTCGGGTTCTTCTCCTAGG	20	-0.24355
VPS13D	GCCGCGGGCCTGCGCCATTG	20	-0.243408
ESPL1	GGGCGAGCTCTGGGGCGGTA	20	-0.243307
PSMA1	GGGGTTATCGGTAGCCAGTG	20	-0.242997
SRBD1	GCACAGCTCACCTTCCCGCC	20	-0.24291
CDC20	GAAAGGGACCCCTTCGCTCC	20	-0.242801
CENPE	GCCGCTGAACAGCAGGTAGG	20	-0.242727
RPL4	GGCAAGGTGGGGCGGTCAAG	20	-0.24268
TRMT10C	GCAGAGATAGTGGTTCCCGC	20	-0.242466
RPL28	GAGCGTTCGTCTTCCTCGCG	20	-0.24218
PRPF19	GGACTGCTCCGCGGCGAGCT	20	-0.241916
TARS2	GCCTGCAAGCCTGTAAACCT	20	-0.241675
BNIP1	GACCAGCAGAGCTTGGGTTA	20	-0.241312
DONSON	GAAAGGGCCATGACGCGCGG	20	-0.24068
ANAPC5	GAGATGAGCCGCACAGGCGA	20	-0.240431
NUF2	GCACTGTAGGTGAGCGCGAG	20	-0.240134
USP39	GCAGCTCCGGTCGCGTCAAG	20	-0.239962
NAT10	GCCAGGCTTACTACGTGACC	20	-0.239276
VPS29	GGGGCCGGGATACGAGACCT	20	-0.239077
CD3EAP	GAGGCCCGTCGGGTCCCGAT	20	-0.238912
LSM6	GCAGCCCCGGAAAGGGCCTG	20	-0.238641
CDC73	GCCGAGGACCCCGCGCTGTA	20	-0.238569
POLA1	GACCGGGCTTCCTTTAGGCG	20	-0.23771
NAT10	GGACACCAGGCATACGCTAG	20	-0.237624
CDC73	GGGCCTTGCCTTACAGCGCG	20	-0.237282
PSMD7	GCGGTCACCGGTACCCTTTC	20	-0.236659
PSMD1	GCCGGGAGGCGCCCAGTCAC	20	-0.236335
DNTTIP2	GGCAGGTCCTCACCCTTAAC	20	-0.236131
RPL8	GAACAGGTAGGTCATCCTTG	20	-0.23597
LTV1	GACGTTATCGCCGGGTCCTG	20	-0.235495
XRN2	GAACGCCGGGACTCCCATAG	20	-0.234608
CLTC	gacgaaagagctcgggtcgg	20	-0.234184
PSMC2	GGTGTCCAGACTAAATTACT	20	-0.233997
MRPL22	GTCCAGAAGGCGCTTGAACT	20	-0.233688
CDC5L	GAGATAGCGGCGGTAGCGCT	20	-0.23287
ATP6V1C1	GACAGCCTAGCGGACGCTAT	20	-0.232826
PSMA7	GGCGCGGTCGTAGCTCATgc	20	-0.232745
EBNA1BP2	GGGGTATCCCGAGACCCAAG	20	-0.232531
RNF113A	gagcggggcggTGCCACGTA	20	-0.232068
RPL7A	GATTAGAGCCCCACTTGGTG	20	-0.231566
GEMIN5	GGCGCAGTACCAGTTGGGGG	20	-0.231532
PSMD4	GTTAGGCCGTCCCGGAGACC	20	-0.231472
PSMD4	GAAAGCACTATGGTGTGGTG	20	-0.230342
TAMM41	GCAGACGCTGCAGAGCTCGT	20	-0.23029
CHAF1A	gcggccgccgcGCTCGTATT	20	-0.229497
MED21	GCTTCAGGACGCTGTGAATT	20	-0.229047
EIF6	GAACCTGGGAGGGTCAGCTC	20	-0.229014
VPS54	GAGTTTCGGTCACAGCTGAC	20	-0.228942
DHX16	GGGATGTCGGAAGATCCTAG	20	-0.228296
MCM3	GAACCTCCACGCGACTTTGG	20	-0.227917
CENPI	GAGGGTGGGACTATCCTGCA	20	-0.227736
COG3	GTTGGAAGCTCCGGTTCTCC	20	-0.227566
MIS12	GGCCGGCGGGGATTGGCAGA	20	-0.227513
TPX2	GAATGAGTCCCGCGGCGGGT	20	-0.227268
COG3	GCCGCTGACCGACAGGCAGA	20	-0.226606
FARSB	GCTTCCCTAGCGAAGCGCGT	20	-0.226518
UTP20	GAACACCTACCGGGTGAGCG	20	-0.226501
RPS20	GGAGCACGAACTCGAAACCG	20	-0.225686
SCO1	GCATAACTCGTCCGGGTACT	20	-0.224427
POLR2B	GTTCCCGGCCTGGTAAGTGT	20	-0.224331
CDC26	GTGAGTCGACTCGCGCGGCT	20	-0.224246
SNRNP48	GTTCGGCCGCTTCCTCTTGG	20	-0.224192
SGOL1	GCGCGTCCAGAACGATACCT	20	-0.224038
HSPA9	GAACTGGGACCTTCCCGAAT	20	-0.22387
CAD	GCCCCGCGCCGTTAGCCACG	20	-0.223055
PSMD4	GGTGTGGTGAGGAGCTACTT	20	-0.222729
TBCD	GATGGCCCTGAGCGACGAAC	20	-0.222728
SDAD1	GGATGGTTGAGACGCCGGTG	20	-0.222309
RPS4X	GGCGAACGCTGGCCTAGGGT	20	-0.221244
PRPF8	GGGTCGGGCCGAGTGACCGA	20	-0.220846
POLA1	GGCCCTTCTGGCGTCGGACC	20	-0.220098
CDCA8	GTAGAGCCGCTCTCTCTCAC	20	-0.220074
HSPA9	GCTGCAGCAGCCCGTCTCGT	20	-0.220029
CSTF1	GGCTGGGACTGCCACAGGTC	20	-0.219895
TPX2	GCCAGGCCTAGCGGCGCGAA	20	-0.219352
RPL11	GAGTGCTCAGAAGCACGGTC	20	-0.219269
PSMD1	GACTGACTGAGCAGCGCACC	20	-0.217921
RBM28	GCTCACTGCGGGCCGAGGGC	20	-0.217882
PWP2	GCTTACCGGGTGAGCGCGGG	20	-0.217847
PRPF8	GGGTGCGTGGCAGGCGTTTA	20	-0.217665
WDR3	GGCGTCCCCACAGCAGTACT	20	-0.217659
EFR3A	GCCGCCGCACCGAGGCTCAG	20	-0.216993
IARS2	GGTCCTGCCCCTTCAAGCTG	20	-0.216616
ASCC3	GACGCAAAGACGCACAGACC	20	-0.216348
DDX56	GCTCCTTCAGGTACACGCGA	20	-0.216314
PLRG1	GCACGCGCGCTAGTCTCCCT	20	-0.215335
MTPAP	GCGAGGAGTCTGGGATCACG	20	-0.215322
ZNF574	GCTAGAGCGGGCGCAGCGTT	20	-0.21522
C3orf17	GCGAGAGCACGTCCAGCGAC	20	-0.215218
SHFM1	GGAGCAGCGCGAGGAATGCT	20	-0.21501
MRPL34	GTACCGGCTGCGGGCGATTC	20	-0.214916
NDUFAB1	GCTCCGCGGGGACCCAGACG	20	-0.214728
CTNNBL1	GGAGAGCAAAGTAAAACGAG	20	-0.214542
METTL16	GCTAGTGAGGTGCCGACTTC	20	-0.214224
EIF2B2	GAGCCCTTCGCTGCGGATCC	20	-0.213033
MFAP1	GTGGGATGGTGGACGACGTT	20	-0.212814
UTP15	GGGAAGCCCACACTCACACC	20	-0.212571
ZCCHC9	GCTGGAGCGCGGGCTGTCTA	20	-0.212551
CDC5L	GCGCGGGGCGTAAGGCGCTT	20	-0.212308
RBM8A	GGTCGTAAGGATGGGAATCG	20	-0.212246
RPA1	GGGGAAGCTGGAGCTGTTGC	20	-0.212104
CDC73	GTAAGGCAAGGCCCCGCCGC	20	-0.211804
FARSA	GCCCGTGGCAAGGGGACTGT	20	-0.211621
RPS14	GGAGGCCCGGGCGCGACAAT	20	-0.210745
GTPBP4	GGGAAATGATCCCGAGTACG	20	-0.209741
RAD51	GGGCGTGACCCTGGGCGAGA	20	-0.209594
FIS1	GGCCGAGGGAAGCCGAACTA	20	-0.209137
DNTTIP2	GGCCAGCATCCAAGCCGCGT	20	-0.208869
MCM6	GTGGCGGTCGAGCGTGGCGC	20	-0.208858
MED1	GCTCGGGATCCCGGGACGCA	20	-0.208595
NAA38	GCGACCCCGGCTCACGCCCG	20	-0.207949
FIS1	GTCCTGAGGAGAGTCAGGTA	20	-0.207734
RPL34	GAATGCAGCAAAGTCCCGGG	20	-0.207365
POP5	GAACTCGGTCATCGAGGCTT	20	-0.207282
CENPE	GCGAGGCCTACGATGTTTCC	20	-0.207282
RPL9	GTGCCATCCCGGCAAGACTG	20	-0.20726
NOL6	GGCGTGATCTGACAGCTTGC	20	-0.207253
ESF1	GTCCTACCAAGCCTCACGTG	20	-0.206837
EBNA1BP2	GTCTGTGACAAGGGATTCAT	20	-0.20653
CENPP	GGCTCCAAGGCTGCCGGCTA	20	-0.206313
PSMA7	GTAGTGGCGCCGGGAGTCGC	20	-0.205949
SF3B2	GGGCAGCCCAGGCGCCATAG	20	-0.205847
RPL27A	GGCCTGGCTCAAGCAAGCAC	20	-0.205689
INCENP	GGGGAGTCACGACCCTGGTC	20	-0.20517
CHAF1A	GCTGGAGGAGCTGGAGTGCG	20	-0.204992
MED30	GTCACAGTGGGCGGAAGTCG	20	-0.204445
DDX56	GCCGGCTTACGGGCTCTGCG	20	-0.203736
RPL34	GCTGTGGCTACTCACGGCTT	20	-0.203735
DNAJA3	GTGCTCCACACGCTGGTTGC	20	-0.202519
CEP192	GCCCGCGTCCCCGACTTCGG	20	-0.202416
PSMD7	GCACGCTGGAGATGGCGCGG	20	-0.201697
TIMELESS	GCCGCGTTCCCGGGTCTCAC	20	-0.201175
RBMX2	GCACTCAGGAATCAGCGCCC	20	-0.20096
ACTL6A	GCCATGAGCGGCGGCGTGTA	20	-0.200929
INCENP	GACTGCGCCACGTCCCCTGA	20	-0.200849
RPL5	GCCGCCCGGTGCGCGAACTT	20	-0.199941
UBA1	GCGACCCGGGGAACCGGCAT	20	-0.199665
MED12	GGGGTCCTGAGGGTAAACAT	20	-0.199015
DDX23	GCGGGCCCCAGGGGTAGTGT	20	-0.198773
LSM2	GGCAAAGCGCGGCCGACTTG	20	-0.198518
PRPF8	GCGGGAGGCGTGGTCGGGTC	20	-0.198176
PMF1	GCGTCCACTTTACCTGCCGG	20	-0.19789
GNE	GAGCTCTCTCGGGTGGCGTC	20	-0.197859
GNE	GCGGATTCGGCACTCCGGGT	20	-0.197487
WDR70	GTGACAGGCTCAGACGCGTC	20	-0.197476
MNAT1	GAAACCGCCATGGACGATCA	20	-0.196753
ATP1A1	GCCTTTCCTCAGGGCACGGA	20	-0.196734
MRPL17	GCGCGTGTGGACGAAATGAG	20	-0.196677
RPS27A	GACCATCACCCTCGAGGTAC	20	-0.19663
PSMD1	GCTCAGTCAGTCGCCTCCTC	20	-0.196517
EIF6	GAAGTCTCCCTGGACGGAAG	20	-0.195886
CCDC157	GGCACCGCTCACCGACACCG	20	-0.195592
RFC4	GCTTTTCGCCCGCCGTTCCG	20	-0.195439
MFAP1	GCTTGGGACCGACATGTTGA	20	-0.195101
GBF1	GTCCGCCAGGATGAGTCGTC	20	-0.194948
ZMAT2	GAGATATCGGGAAGCCAGTC	20	-0.194943
CHMP2A	GTGGGCCCGGCACCAAAGCA	20	-0.194892
SNRPF	GGAGGGAGACCAGCCTCGCG	20	-0.194829
EIF2B5	GAAGCGGCGATCGAAGCTAT	20	-0.194589
CCDC157	GCCGGCCGCTATGAAGGGCT	20	-0.194416
DLST	GCGGACACCGGATATAGGGC	20	-0.194325
MMS22L	GACCACCAACAGGAATCTTT	20	-0.194172
NOP2	GAAGGTGGCGTCGCGCGTGT	20	-0.194015
SNRPB	GGAGCCACTTAGGGCGGTGA	20	-0.193369
THOC7	GGGAGCCGTGACTGACGGTG	20	-0.193306
SNW1	GGGTCTTTCAGCGGTTTCCC	20	-0.19319
DERL2	GATTACTCTGGGGTTCGAGT	20	-0.192491
CDC20	GTGGCCGGCCAGGAGCGAAG	20	-0.192408
MTOR	GTCCTCTAAGCCGGGAGCGA	20	-0.19215
MTOR	GAAGCCGCGCGGTGAGTCTA	20	-0.191861
EFTUD2	GGCGTTTCCTCGGCGTGGGG	20	-0.191543
RPL27A	GGCGGTGTACGGTTTCGGTG	20	-0.190675
ZNHIT6	GGCTGCTTGGCTCCACACGT	20	-0.190051
RPL10	GCGCTTACTCACCACACCGA	20	-0.189218
NDUFAB1	GGCGGCTGACATAGGCTGAA	20	-0.188906
HMGCS1	GTTGGCGGCTATAAAGCTGG	20	-0.188037
CDC23	GCTTATTGCGGGCCTTACCC	20	-0.188011
MVD	GGCCTCTGGGGTGGGATCGC	20	-0.187532
MCM4	GCCGGGGACGACATAGTGCT	20	-0.186026
PSMA7	GTCGGGCGAGAAGACGGTGA	20	-0.18518
NMD3	GCACACGGGTTCCGGGCACG	20	-0.184603
RPS24	GGTCCCAGTACTTGAGCTAT	20	-0.183842
ATF5	GACAGATATATACTGGGTGG	20	-0.183737
EXOC4	GGGAGAGCCGCTAGGCTCCA	20	-0.183032
MED11	GCGGGGAGCGAAAGCGTGAC	20	-0.182184
PRPF19	GGGAAAGGGCAATTTCCGTT	20	-0.18164
XRCC6	GCAGGCGGGCCTCAAACGCG	20	-0.180896
SNW1	GAAGATGGCGCTCACCAGGT	20	-0.180635
PSMC1	GACTAAGGGTTTCTTTCCGC	20	-0.180444
CDC27	GCTAAGGGTGAAGTAATGTA	20	-0.180317
METTL16	GAGGAACCCGTGTGATCCAC	20	-0.180228
CWC15	GAGTGCCTGTCAGGCGCGTC	20	-0.180136
RRS1	GTTTGACCTGGGCAACCTGC	20	-0.179817
POP5	GCCGAAAGTTCCGTGCACCC	20	-0.179775
MED14	GACTCTGCCCGCTCCCGTTT	20	-0.17922
SMU1	GCCGGGGGCCTGGAGGTTAA	20	-0.179093
PRPF18	GGTGAGGACCCTGCGGTCGT	20	-0.178996
CSTF1	GCTGTTGCTTCACCGATAAA	20	-0.177767
NUP54	GGCGCCAAGGGCGTAGGAGG	20	-0.177767
NUP93	GCCTCGGGGGCGGCTCGACA	20	-0.177217
TOP2A	GGTCAGGCCGGCGACCGGCT	20	-0.177008
MED17	GATTCACCGGAAGCGCTCTA	20	-0.176767
RPL19	GCGCTGACGCGTGTCGACAA	20	-0.17656
EIF6	GCTCCGGTCCTGGGTCGGGA	20	-0.176185
RCL1	GAGCGCGCACATGGCGACTC	20	-0.176116
HSPA9	GACCTTCCCGAATGGGGTCA	20	-0.175167
NOP2	GCGCTACCTGGGTTTCAGGT	20	-0.175081
CEP192	GGGACGCGGGCTCGGTGAGG	20	-0.174258
RPL17	GCGGTGGCTTCTTATGCGGG	20	-0.17356
EXOSC2	GAAACATCTAGTGGTGCCGG	20	-0.172474
PSMD1	GGCGCCTCCCGGCGGAACGC	20	-0.171433
RPL10A	GCCTTCAGGTGCCCCGCCGA	20	-0.171416
EIF3A	GGCCTCCGAGGTCGAGAGCG	20	-0.171316
PAF1	GCTCGGAACCACACACGGAT	20	-0.171238
RIOK2	GAAGGGAGAACAGGAACGGC	20	-0.17042
CIRH1A	GCACCGGGAAGGGGAGCGTG	20	-0.170297
POLR1E	GCTGTACTGGGTAAAGACTG	20	-0.170268
DONSON	GCCCCGCCACCAGGGCGGCT	20	-0.170175
WDR36	GCGCTGAACCGCACCACGTG	20	-0.170151
OXA1L	GCTTGCTACAGTCCGGGCGT	20	-0.169707
RPTOR	GAGGCTGTACGTTTCCAGAG	20	-0.169644
RPS27A	GGTCCTTCGGCGGGAGCTCC	20	-0.169123
TTI1	GCCAGAGAGCCGAACACATA	20	-0.168491
IMMT	GCCCGGGCCTCTCCCGACGA	20	-0.168151
POLR2I	GAGGGGCCTTCCATAGTTCA	20	-0.167894
MTPAP	GTGGCCTGTGGAAACGGCTG	20	-0.167029
MED14	GCTCGGTCACCGCGCCGAAA	20	-0.16637
MYBL2	GAAGGCGTCAGCGTGTCAGC	20	-0.166211
RPL21	GGCGCACGCTGCTCCCCGTC	20	-0.165985
RPL19	GTCCCGGGCCTCCGGAGTGA	20	-0.165747
CLTC	GTCGCCGGGATCCTTCCGCT	20	-0.165462
CMAS	GCCTCCCCGGGCCAGAATTA	20	-0.165004
NUP93	GCGGAGACGGCTGTAGCACA	20	-0.164658
NOC3L	GCAGTGACTCTATCACCCGA	20	-0.16434
RPL14	GCGCCTCAGCTTCCCAGCGG	20	-0.164326
PSMA3	GGGGTGAGTTCGCTGTCTGT	20	-0.164247
INCENP	GGGCAAGCGGGGCCTTACCT	20	-0.163575
NAA38	GAACAGCATGACGTCCGCTT	20	-0.163409
PSMD1	GCCGGCTTTTAGCTGAGTCA	20	-0.162671
PAF1	GCCGGACTTCATTTCCCCGA	20	-0.162532
RPL31	GACTGAGCCTGCGTCGGGCG	20	-0.162184
MRPS27	GAAGAACCACTTGCCGCGCC	20	-0.160763
BIRC5	GCCGCCGCCACCTCTGCCAA	20	-0.16062
DBR1	GGATAAGATCTATGAGACGC	20	-0.160168
RTCB	GCGGCTCTTCAAAGCGGAGC	20	-0.158801
SNRPF	GTTTCCCATTCATCCGCGTG	20	-0.158754
UTP3	GCCACGCGGAGAGCATGCTG	20	-0.158676
MTOR	GACATTACGCCGCCCTAGAG	20	-0.158527
RPL36	GAGTACCGGCTCAGTTCCCG	20	-0.158258
EIF5B	GGGTTGGGTCCGTACGGCGG	20	-0.158097
SNRPB	GTGGGAACCGCGACTGATCG	20	-0.157922
FTSJ3	GGCGCTTGACGGACCAGAGC	20	-0.157816
RPS29	GTCGCTGGTGCCGCCATTAC	20	-0.157677
NOP2	GCGCCCCATGGTACTGTGGC	20	-0.157398
RPS24	GTCAGAGGATGGTTGTCGAG	20	-0.15727
DDX27	GACAACATGCTTGCGGACCT	20	-0.156809
DHX15	GAGCTGCCGCCTCGCGCCCC	20	-0.156575
EIF4E	GTAGCGCACACTTTCTGGTG	20	-0.155893
MCM10	GAGTTGCTGGCCGTCTACTA	20	-0.155859
ATP6V1A	GCTGTCACCCTGCACCGGCA	20	-0.155014
DONSON	GCCATGACGCGCGGCGGCTG	20	-0.154919
RPL12	GTCGGTGCGTGCTCTGGTTG	20	-0.15441
WDR43	GCAGGTACCACTGAGGTGCG	20	-0.154253
MIS12	GCCCGAAGAGAGGTCCTAAT	20	-0.154221
GEMIN5	GCCCCTGGGGAGCGTACAAA	20	-0.154112
PMF1	GGTGAAGCTCCTCGACACCA	20	-0.154035
RPL31	GCCGGAGCGGCAGGGATTTC	20	-0.154012
GNL2	GGGAAGGAGGGTTACTCGAG	20	-0.153967
ESF1	GAATTAGAGAGCGGGCAGAA	20	-0.15381
CARF	GCCAGTGACCGGCTGCGGCT	20	-0.153776
MED12	GCCTCCCGATGTTTACCCTC	20	-0.153639
SF3B2	GTTGGTCGCGCGCCTTCCTG	20	-0.153306
RPL32	GCCTCCGCACCACTGGGCGA	20	-0.153164
NUDC	GGGCGGCGTGCAGGAGGTAA	20	-0.152919
CCT4	GGATGGACCCGGATTCTGGC	20	-0.152801
CWC22	GCTACGCTCGGGCCCGCAAG	20	-0.152467
UBA1	GCCATCTTGTGTCGGCGGCT	20	-0.152432
DARS	GGGGTCTCAGCACACGCGCT	20	-0.151853
SMN1	GTCACTCTTAAGAAGGGACG	20	-0.151761
SMN2	GTCACTCTTAAGAAGGGACG	20	-0.151761
DDX54	GGCCCTTGTCGGCCGCCATT	20	-0.151532
LDB1	gagcggagcagCCATTGTTG	20	-0.150965
RPS29	GACGGCTACTACCCGCATCC	20	-0.150892
UTP15	GGTGAAGGCGGCTCCCATTG	20	-0.150158
SMN2	GATTCCGTGCTGTTCCGGCG	20	-0.149666
ANAPC5	GATTGAAGTAGAGGCTCTCG	20	-0.149532
RPS27	GCCTGTGAGTGCTTTGGTCC	20	-0.149508
WDR33	GGTGAGTGCGGCGGCGACAC	20	-0.149483
NBAS	GCCTGAGTCCTCGGCGAACA	20	-0.14904
LTV1	GCCAGAGGCTGCTTGCGGCA	20	-0.148716
NOP10	GAAAGTCCAGAACCGAGGTG	20	-0.148579
RPS24	GATGGTTGTCGAGGGGCTCG	20	-0.147715
MCM3	GCGCCGGGGTGGAGTCATCC	20	-0.14769
PMPCB	GATCTGTGGCGCCGACTCTC	20	-0.147587
PSMA7	GCAGGACACGGCGCCGAGGG	20	-0.147571
FDPS	GTAACGATACTGTGAGGCAT	20	-0.146686
TAF1	GCGTCTTGGATGATGTGAGG	20	-0.145824
GPN3	GCTCAGTGGGCGTCGCGCGA	20	-0.145433
BDP1	GCGTGCCCTGCGGAACATGG	20	-0.144933
RPS27	GCGAGATCTCCGCCGAAACC	20	-0.144563
RPS13	GGGCATCAAGCCGGATTGCT	20	-0.144344
MFAP1	GCAACCGCCCATTCAGTCTA	20	-0.144173
PSMA1	GAGAGCCTCGGCAGACGGCC	20	-0.142755
NKAP	GGGCTGCGTGAGCCGGACAC	20	-0.142017
RPAP2	GCTCTCGAAAAGCCGCAGGT	20	-0.14189
ZMAT2	GACAAACTCCTGCACCCGAC	20	-0.141064
RPL7A	GACACCCAGCCCTGCGACAC	20	-0.140876
FARSA	GGTGCAAGGGCAAGGCGGTC	20	-0.139133
METAP2	GATCCAGGTCGCCATTCAGG	20	-0.138245
EFTUD2	gcctggagcgggaaaaagaA	20	-0.13789
ARCN1	GCTCGGATCTTACCATGGTG	20	-0.137669
ATP6V1A	GACCGGTAACTGGCGAGTGG	20	-0.137593
MRPL22	ggaggcgctcagtTACCAAC	20	-0.137389
EIF3E	GCGACCGCCTCGCACGTGTC	20	-0.136977
BDP1	GGGTCATGAAAAAGCGGCGG	20	-0.136325
RPL10A	GCCGAGGGTTCGGATCCTGT	20	-0.13587
PSMD6	GGCCTCACTGTTATCGCGGA	20	-0.135632
TAF2	GCTTGTCGACGGCGGCTTCT	20	-0.135355
RPL31	GGCAGGGATTTCCGGGTCGG	20	-0.135275
NUP93	GCGACGCCAAATGAACTTTA	20	-0.135272
PHF5A	GGGGTGTTGTAGGAGCGCGC	20	-0.13516
DDX23	GTTCCCACGAGCTTACAGAA	20	-0.134782
NUF2	GCCTTCTCCATCCCAAGGCG	20	-0.134522
RUVBL1	GTTACCATGCGGCCGTTACT	20	-0.134323
EIF4E	GTCAGAAGGAAGACGGAGCG	20	-0.133798
POLR2B	GCCTTGTTCCCACACTTACC	20	-0.132716
RPS6	GTGAATCGAGTCCCAGAACG	20	-0.13232
NUP205	GCCCAGAATTAGGGAAAAGC	20	-0.132229
C9orf114	GGAACATGGCGGAGCGCGGC	20	-0.13196
LSM6	GCTGCGCCCGGCCCCGTCGT	20	-0.131408
SNRPF	GATGAATGGGAAACGCGCGA	20	-0.131368
FARSA	GCTTGGACGTAGAGCGCCCG	20	-0.131285
SRRT	GGCGCGCGACGAGGACTTCG	20	-0.130949
RAD51	GCGGGGTGAAGTCGGAGCGC	20	-0.130583
NUP54	GCGCGCTCCCCTTCTCAGTC	20	-0.130562
FDPS	GCTCGGTCCCGCTTGTTGGC	20	-0.130558
SNRPG	GTGTGAGAGCCAAACCGAAG	20	-0.130195
EIF3G	GAAGCCCAGTTGGGCCGACC	20	-0.129737
SEC13	GGTGAGTGTTGGTACTGAGG	20	-0.12944
RCL1	GTTGCACCCTGCGTAGCTGA	20	-0.12922
RPL27A	GAGGCCCTTAGGGTCGGCTT	20	-0.128962
DCTN3	GCAAGAGCGGTCCACTGTCC	20	-0.128691
NOL6	GGGCGGAAATGCCTAACTCC	20	-0.128321
SNRPG	GTGAAGCGGCTCAAGACATT	20	-0.127627
EIF2B3	GACTGACAGCCCAATGGCGC	20	-0.127528
MRPL19	GGGCTGCAATGGGCCTAGGC	20	-0.127148
EIF2B5	GCCGCCCCTACAAGCAGTTC	20	-0.126735
PDCD11	GTAACCCCAGGCTTTGTGTT	20	-0.125838
ZMAT2	GCAGGAGTTTGTCTCTATTC	20	-0.125795
MIS18A	GAGTCTCTTGCCCAACAGCG	20	-0.125359
PHB	GAGTCCGACTTGTGAGGGAG	20	-0.125293
C9orf114	GGCTCACGCGGCACCTTCGG	20	-0.125145
MED22	GAGTCTGGCGCACGACCGAG	20	-0.124917
UBA1	GCGATTCTAGGCGGCCCAGG	20	-0.124838
SSBP1	GGTGGCGCCATCTTCGGTAA	20	-0.124833
PSMA1	GGTATGAGAGCCTCGGCAGA	20	-0.123786
NUP205	GACGCCTTTGGCGGTAAATT	20	-0.12354
MRPS14	GCTCGGTGAGGACCAGTCCA	20	-0.123403
CHAF1A	GAGCCGCCACAGGTCGGTTC	20	-0.122793
NUP93	GAACCCAGGACCCCGTGACT	20	-0.122557
MTOR	GGTCGTGGGGCCGGCAATGT	20	-0.122008
DKC1	GCACGCGGTGCAGGGTAACA	20	-0.121616
ACTL6A	GGCCGCGACTGCGAGTCTCG	20	-0.121156
WDR75	GTTCGGACTCGCCCGCCTGG	20	-0.121083
TIMELESS	GAAGCTATGGGGGCATTCTC	20	-0.121033
RPS29	GCACGCCGACTGGGAGTCGC	20	-0.120934
TBCD	GACGCGTTCCGTAGCGAGGC	20	-0.120459
EIF2B4	GGCTCCGCGTACCAGTAGGC	20	-0.120294
TIMELESS	GCCTGCGCGAAGAGCGAGGC	20	-0.120075
GNL2	GTGGTCCGGCGTGGTTCAGG	20	-0.120064
RPL5	GCCCGGTGCGCGAACTTGGG	20	-0.119961
EXOSC3	GATTCAGCCGCGACAGACGC	20	-0.11991
BNIP1	GTCACCGGGACACAACCAAA	20	-0.11971
XRN2	GCAGGGCGCGAGCTCCGGCA	20	-0.118826
PABPN1	GGCGCAGCTCTCCAATCGCC	20	-0.118689
SMC2	GGAATAAATAGTTCCGGCGC	20	-0.11843
SAMM50	GTTCCGCGTCCGGGGGTTTG	20	-0.118169
MMS22L	GAGGGTCGGGGTTGGCCCTA	20	-0.118026
POLA1	GGCGCACACCCGGGTTTGTT	20	-0.117775
RBM22	GAGGCTAGCGCCGCGCCGGT	20	-0.117615
RPA1	GAGCGGTGCGCGCAACTTCT	20	-0.117607
EXOSC3	GCGCTGTGGGGACCGCCTGC	20	-0.117476
SHFM1	GCCCAGCGGTTACCTTCGGC	20	-0.117314
FTSJ3	GACACAGCAGATCCGGTCGC	20	-0.115856
SUPV3L1	GGCCCTGAGGTTTCACAGTC	20	-0.11516
PSMA5	GCCTGGGTTCTGCCGTGTCA	20	-0.115027
HSPA9	GTTCCTCACCTGGTGGCGGG	20	-0.114994
IMMT	GCTCCCGGAGGCGCGTGAGG	20	-0.114721
DERL2	GGGGATGGGTGGAGGCGTAC	20	-0.114475
SRSF1	GGCTCGCTCTGCCGTGCGCT	20	-0.11444
TAF2	GGAAGTCTTGTCAATGGGCA	20	-0.114208
NUP62	GCGGGGAATCACGGTCGCGC	20	-0.114125
SMU1	GAGATCCAAGATGCTTCTTT	20	-0.113535
POLD3	GCAACGGAGGCGACGCACTA	20	-0.113102
NBAS	GGTGGGGGACTAGGGCCGGT	20	-0.112681
RPS23	GAGCTGTTGTGGCCGGTTTA	20	-0.112363
VARS2	GGGCGCCCTGGGATAGCGGC	20	-0.112111
DNAJC19	GTGCGGCCTTCCGGTCTTCT	20	-0.111821
MYBBP1A	GCATGCGCACCGGTTTGTGT	20	-0.111452
RPS20	GGCGGCGCAACGCAGGGCTC	20	-0.111073
DYNC1I2	GGCTACAATTCCTCGCAGCA	20	-0.110584
SEC61A1	GGACTCACTTGCCATGGCGG	20	-0.110118
NPAT	GCCAAAGGTTTTCCCTTGGT	20	-0.110003
NAA38	GCTGTTCGGCCCGGCGGTTC	20	-0.109957
EIF4E	GGCGTGTAGCGCACACTTTC	20	-0.109437
RTCB	GCCCAACATGCAGGTAAGGC	20	-0.109367
PSMC1	GAGAAAGAGGCGGCTGCCCG	20	-0.108915
RPS14	GAACGAACTCAATCCCGAGT	20	-0.108887
BNIP1	GGACACAACCAAATGGGGAC	20	-0.10843
INCENP	GGAGCAGCCTTCAGGGGACG	20	-0.108154
SRRT	GAGAAACTCGGGGCGAGTGG	20	-0.108144
MRPS33	GCCTGCGCGAGCTTGGAGCC	20	-0.108092
CDC23	GTGTAGTAGGCCCCGCTCCC	20	-0.108058
EXOSC2	GCCGGGGGATACAATCACTA	20	-0.107611
MED22	GCGCCAGACTCCGAACCTAG	20	-0.107511
DHX16	GACGAGCTGCACTCGGTGTT	20	-0.107309
EFTUD1	GTTCCTCCGGCACCGCCCAA	20	-0.1071
NOL11	GCCTGAAGGACTCCTAGGCG	20	-0.106889
CCT3	GGCGACTACCTTGAGAGTAG	20	-0.106483
CSTF1	GTTCACTGCGCACGCTGAAA	20	-0.106248
IMMT	GGTCAAGCGGACGGCGCTGC	20	-0.105335
EXOSC2	GCTGCGCCTGCGCAACTCAT	20	-0.105207
NIFK	GGTAATGAAGGCGAGCACGA	20	-0.105108
HSD17B10	GCCGAGGCGAAGCGGCGGAA	20	-0.104575
TCERG1	GATTCAACCCGGGGGAGCTC	20	-0.103818
MRPS35	GACGAGACAGACACTCACGC	20	-0.103613
ATP1A1	GTGAGTGTCCGGCGCGCCCG	20	-0.103586
MED21	GGCAGCTCTGGCACGCGTCA	20	-0.102555
RPL14	GCTCGACCTCCACCTCCGCT	20	-0.102245
HSD17B10	GGAGAAAGAGATCGGTTTCG	20	-0.10194
RRP12	GACCCATGTTGACTAAGCCG	20	-0.101244
CSTF1	GGGACCGATCGATAGCGCAG	20	-0.101243
SEC61A1	GTTCCGTCCCGGCCTCAATA	20	-0.101052
MYBBP1A	GGGAAAGATGGGACGCCGCT	20	-0.100858
VPS13D	gcccctacctgtcggtgtcc	20	-0.100047
MIS12	GTCTGTCCCTGGCAAGCCAG	20	-0.099542
EIF6	GGCTCTCCCGGAAGTCTCCC	20	-0.0988615
PSMA5	GGGGATGTTATGCCCTCCTC	20	-0.0980725
MRPS33	GATCCTGATGGTTATTAGGG	20	-0.097994
EIF5B	GTCCTCACGCCGAGGCGGCT	20	-0.097965
UMPS	GGCGGTCGCTCGTGCAGCTT	20	-0.097494
PSMD4	GTGAGGAGCTACTTCGGGGC	20	-0.0971514
PARS2	GCCCGCCCCAACTCAAGGAC	20	-0.0970073
SRSF1	GCTCTGCCGTGCGCTAGGCT	20	-0.0960195
WDR43	GCAGGCCAAGGTAAAGCGAG	20	-0.0958193
RPL30	GACCGAGGTTTAGGCAGCGC	20	-0.0951028
CD3EAP	GCGGGTTGACGGGGTGCGGA	20	-0.0940458
DDX21	GCTGAATGGAGCGGAACCCC	20	-0.0928492
MED22	GTTTTCGGACCGCGGCGCGG	20	-0.0928198
NUP205	GGGACTCTAGGCCCAGAATT	20	-0.0926347
PSMA7	GTGTGCGCTTTTGAGAGTCG	20	-0.0925546
LTV1	GCGGCACGGTACCCCGAAAT	20	-0.0922014
DYNC1I2	GCTTTACGACAGGTAAGTCA	20	-0.0917469
NKAP	GTTCCGCAGCGGCAGGTCCC	20	-0.0914584
UTP3	GTGGGGAGATCCCGGCGGCG	20	-0.0911303
SMN1	GCACTGGCTGCGACCTCACC	20	-0.0907615
SRBD1	GTGTCACGAGGTAGCTAGGA	20	-0.090568
RABGGTB	GTGAGTTTAGCGCTGCTGTC	20	-0.0903271
WDR3	GAGACGGGCGTGTTAAAGGC	20	-0.0892968
COPB1	GCAGTGGTTTGGTGCAGCCG	20	-0.0892572
RPS15A	GAGACCGAACCTTAGATTGC	20	-0.0889971
PSMD1	GATACACTGCGCAGCTGGAA	20	-0.0887517
PSMC2	GGCAGGCAAGTTAATCCGGC	20	-0.0883737
SMC2	GTGACCCGGAGGAGCTTTTG	20	-0.0883344
TUBGCP5	GAGAATGCCGCCAGCTCCGG	20	-0.0878622
EFTUD2	GTCTGCGGGGTCCTTCCTGG	20	-0.0876242
TARS2	GCCAATGAAGAATTACGTGG	20	-0.0875998
RPL27	GACCTTCGACCCCCAAGCCG	20	-0.0875018
MCM6	GGCGGGTGTTCCGGAACCTG	20	-0.0868482
USP39	GCAGCCCTGTGCGCGTGAAG	20	-0.086022
COPB1	gcgactaggccgcttgcgtc	20	-0.0856953
OGDH	GTCAACACGTAGCCCTCCCC	20	-0.0853958
PMPCB	GGGACCTCAGGTCGCGACCC	20	-0.0850278
ORC5	GACGCTGCGGGTCCGGTTTC	20	-0.0849855
GTF2B	GCAGAGCAGGGCTACGGGTC	20	-0.0841795
PRPF19	GCGTGTGGCGCCTCGGAGCA	20	-0.0840665
RPL27A	GCTCGTTGTGCTAGGCTCGG	20	-0.0836841
TSEN2	GGCCGCGCTTTCCTCGCCCA	20	-0.0828442
ACTL6A	GTGGGTGGCGGTGGAAGTTA	20	-0.0828389
RPS18	GCGGCATCGCAGCTCGGGCA	20	-0.0824657
EXOSC2	GGGCTCTCTGCACGTGGTCC	20	-0.0822373
MRPL19	GCCGGGTTGGGGGAGATTGC	20	-0.08167
TTK	GTCAGTAAAGGGCCGGCCCA	20	-0.0812039
PSMC1	GCCAGAGGCGGAAGTCGTTA	20	-0.0811825
RPL5	GAGTGGATGCCTCGGTCTCG	20	-0.081108
EIF3A	GCCAACGGTGAGTAGCTGAT	20	-0.0809761
INTS4	GGGATTTGGATAATCTACCC	20	-0.080579
RPL9	GAATCTGAAACCATCTGCTC	20	-0.0804242
IMPDH2	GGTCTCTGCGGCGCGGTCCT	20	-0.0801498
DDX54	GTGGGGCTGGGACGCATGTT	20	-0.0797443
RPL21	GCGATGTTGCGGCCCTGCGG	20	-0.0795304
DERL2	GAGGGGCTGGTCCCGGGGAT	20	-0.0791432
MFAP1	GCAGCTGTGTTCGCGGACTC	20	-0.0788689
C9orf114	GGTGCCGCGTGAGCCTCAGC	20	-0.0788196
PAF1	GACGCTCGCCAATCCGTGTG	20	-0.0785266
RPL21	GGGAGCAGCGTGCGCCGGGT	20	-0.0782844
POLR2B	GAGCAGCAGTGAACGTAACC	20	-0.0781279
CDC16	GGGCCCCGCACCCCGAGTCG	20	-0.0777527
C14orf166	GCTGAGTCGCTCCGAAATGA	20	-0.0777141
PSMC1	GCTGGTCGTCGCGGTGCGAT	20	-0.0771529
GNPAT	GGCGGTTCTTTCGCTCAGGA	20	-0.0769734
RPLP2	GTAGCGCATCCTGAGGCGGG	20	-0.0767754
MCM10	GAGCTCGGGTGGGCGCGATC	20	-0.0765781
PRPF18	GTATGTGTGTCGGGGTTTTG	20	-0.0764595
MKI67IP	GACCGGGTCTAGAGGGTATC	20	-0.0762631
NIFK	GACCGGGTCTAGAGGGTATC	20	-0.0762631
FTSJ3	GTGGCGGCCCGGCAGGTTAC	20	-0.0760111
GNL2	GGTTTGTGCTGGCCTTGGAC	20	-0.0756399
PDCD11	GAGGAAACCTCATGGCTGTC	20	-0.0750039
TCP1	GTGAGGCTCCGGGGAAGGGG	20	-0.0749842
RABGGTB	GCTATATCGGAGCGCGATGG	20	-0.0746649
SF3B2	GGCAGCTGCAATTCTGCTTT	20	-0.0744283
CDC27	GTGAAGTAATGTAGGGCCAG	20	-0.0742679
MRPS9	GCGGGGCCTAGAGACGGCGC	20	-0.0741613
POLR2A	GAGAGCGCGGCCGGGACGGT	20	-0.0741499
RPS4X	GGGATCACGGCCTCCGTGGT	20	-0.0737508
RPS19BP1	GGATCCCTCTGTTCGGGCTC	20	-0.0733984
MRPL10	GGTCCTCACGGCGTGTCTTG	20	-0.0733509
RPL10A	GGGCATTTCTCAAGGCGGGT	20	-0.073333
DYNC1H1	GCCTTCTCATCGCTCCTGGA	20	-0.0732573
PRPF8	GCTGCGCTTCTTGTGGGCCC	20	-0.0729238
RPL31	GACGCAAGCACCTCCAGCGC	20	-0.0724769
TTC1	GAAGCAAGACATTGCTGTGG	20	-0.0723342
NRDE2	GTGACGGGTTCCTAGTGGTT	20	-0.0719621
RPL3	GCGTGCGTGGAAATGGCGCT	20	-0.0719536
RPL10A	GCGCCGCGGGGCATTTCTCA	20	-0.0716252
THG1L	GCAAGCGTGGAAGGTGCTAA	20	-0.0713163
CCT6A	GACGACCTGTGGCCCAATGG	20	-0.0711382
RPL5	GTCTCGGGGCTTTAGATGCA	20	-0.0711123
EIF4E	GCGATCAGATCGATCTAAGA	20	-0.070433
CMAS	GCAGCCCTAATTCTGGCCCG	20	-0.0704216
MCM10	GGGTCCGAGGCTAGAGGCGC	20	-0.0703437
DCTN3	GGACGTCAGTCCAAATAAGA	20	-0.0702697
ORAOV1	GGCCGGGTAAGAACGGCACG	20	-0.0699999
MINOS1	GACTTTCAGGGGTCGGAGCG	20	-0.069846
LSM5	GCCCGACCACGTTAAAGAGC	20	-0.0693625
ATP6V1C1	GACTTGTTCTGTGTTCGCTT	20	-0.0687811
UTP15	GTGTCTCGTCGGACCCTTTG	20	-0.0684951
COPB1	GCCCCTCGGAGCCTGGTAGT	20	-0.0684628
SRFBP1	GTTGGAGGAACTTTCGTGGT	20	-0.0683173
EBNA1BP2	GATGGACACTCCCCCGCTCT	20	-0.0681821
GTPBP4	GAAGTCCCACCTGCGCCCGA	20	-0.0681482
RPS23	GGTTTAAGGGCGCTGCAAGC	20	-0.0679068
UMPS	GGGGACTTCGTGCTGAAGAG	20	-0.0678633
RRP12	GCCGGCTGAAGAAGCGGCTG	20	-0.0678212
CD3EAP	GAGAGAGGGTTATCTTGTGG	20	-0.0676624
SF3B2	GGAAGTCGAGGGGCCTTTAC	20	-0.0676105
LTV1	GCAAGCCTTGCTTGTTTCGG	20	-0.0665718
DNAJC19	GGAGCAGCCGCAAACTAGGC	20	-0.0659642
RPL31	GGGACGACGCGACAGCCCTG	20	-0.0654194
TUBGCP4	GCCGCAGCGATTGTCTCGGT	20	-0.0649219
PAF1	GTCCGGCTCGGAACCACACA	20	-0.0643502
CSE1L	GCCAGCTACGGTCCGCGGCT	20	-0.0633515
CLSPN	GGGGAGGCAGAAGTCATGAC	20	-0.0632987
EFTUD1	GGCCAGCCTTTGGGCGGTGC	20	-0.063158
CENPT	GCGGCGACCCCGGAGTGCTC	20	-0.0630856
CDCA8	GAGCGCCATGGCTCCTAGGA	20	-0.0630718
POLD3	GCACTACGGCGGCCCTCGAA	20	-0.0630404
TUBGCP5	GCGACGTGCGGGAGCTCGTC	20	-0.0623577
EIF3G	GGCGATCGCGGAAAGGGGCA	20	-0.0623432
RPL17	GCCAGGATGGCGGCGATGGC	20	-0.0614856
DONSON	GAAGAGGCAGCCCCGCCACC	20	-0.0613295
NUBP1	GCCTCACGGTAAGCTCGCGG	20	-0.0609157
PSMD1	GCTTTTAGCTGAGTCAGGGC	20	-0.0602305
EIF3F	GTTCCGGGTAAAACTTGGGA	20	-0.0596926
DMAP1	GGCCCTCGCACTTCCGCACC	20	-0.0595893
ASCC3	GCAGGGCCAAAGATGCGAGC	20	-0.0595866
NPAT	GTCCTTCTGTCCAGCATAGC	20	-0.0580333
CHMP3	GTAGGGAGCGGCGGCACTAG	20	-0.0578916
RPS13	GTAGTCACACAGACGGGCGG	20	-0.0575362
IARS2	GGGGCGTCCCCCACAAACTT	20	-0.056783
RPS5	GCAACCCCGGGCCCTCGTGC	20	-0.0567544
RPA2	GCACCTTCTCGGCCTCTTTG	20	-0.0563885
CHAF1A	gccgccgcGCTCGTATTTGG	20	-0.0563098
NOP10	GACGAACACGTGACGCGGTC	20	-0.0561724
POLD3	GATCGTGAGCAGCTACTACT	20	-0.0558272
SRSF1	GTCACCGCCATGTCGGGAGG	20	-0.0556727
RPTOR	GCCTGTCTTCGGAACTGCTG	20	-0.0554006
TWISTNB	GCACAAGCAGCGGCATAAGT	20	-0.0550282
POLD3	GGGAACGCGGGCGTGCGACC	20	-0.0548257
PMF1	GCTGCGTCCACTTTACCTGC	20	-0.0547305
MCM4	GCGAGACCCAGAGTTCCCGC	20	-0.0546062
SPDL1	GAGCTCCCATTAGGAGCCGC	20	-0.0542245
DDX54	GACGCCCGGGCCCGGAAGGT	20	-0.0536672
PSMA3	GAACTCGGACAGACCACATG	20	-0.0535388
INTS4	GCACTTTGCCGGAACAGAAG	20	-0.0533652
ACTR10	GTCGAACACAGCTGGCGTCA	20	-0.0532541
NSRP1	GAGAGTTTACGTGACGACAT	20	-0.053036
SRSF1	GAGCGCAACGGGTGCTGCGA	20	-0.0526093
NOL11	GCGAGAATGAACGGGCCTGA	20	-0.05255
RPL23	GGCGGATTCGTCAGGAGCGG	20	-0.0517462
SEH1L	GGAAGTCGAAAGAGACATCG	20	-0.0516086
MRPL35	GATGGAATGGGCGTTTAGAC	20	-0.0513234
GEMIN5	GGCAGTAAGTCTCGGGCCCA	20	-0.050931
TARS2	GTCCTCCGAGTCCCCAGAAA	20	-0.0507621
DONSON	GCGCGGCGGCTGAGGGTAGC	20	-0.0504047
PSMA3	GTGGGCCATTTGCAGCTGTT	20	-0.0500899
CSE1L	GAGAGCGGAATGTGGGCCCG	20	-0.048986
PMF1	GACGGCCGCAGGCTGGCGCG	20	-0.0489747
RPS4X	GATTCCTACTGGGGATGGCC	20	-0.0488547
RPL21	gccgcggcgcgcgccTTACA	20	-0.0484185
POLA1	GTTTGTTTGGGCGCAGACCT	20	-0.0478953
CDC5L	GATCTGCGCAAGCGCAAGGT	20	-0.0475383
NIP7	GCGCTAGCGAGACGAACTAT	20	-0.0474849
RPL31	GCGTCGTCCCTGTGCGTGGG	20	-0.0474562
RPP40	GATGCCGGTGGCGCGACTTG	20	-0.0474442
NAE1	GAGGCTCACCGAGCCGAGGG	20	-0.0474157
UBA3	GCGGAGAACAATATGGCGGA	20	-0.0474154
OGDH	GCGACACCCGGCACTGGGAC	20	-0.0472438
NAA38	GGACGTCATGCTGTTCGGCC	20	-0.0465852
MRPL35	GAAACTGGTGCGGGATGGAA	20	-0.0465413
PHF5A	GGGGTTCCCGTCTCTTCCTT	20	-0.0465412
NUDT21	GCCGAACTGAGTGACCCCCC	20	-0.0465317
ADSL	GAAGAGCGGAAGCGGAAACC	20	-0.0463835
SMN2	GTTACTACAAGCGGTCCTCC	20	-0.0460182
NIFK	GCGAGCGGGGGCGATGGACC	20	-0.0458271
MED22	GCACTGGACGGCCTCGGCGC	20	-0.0454338
RPS5	GAGGGGAGACCGCCGGCACG	20	-0.0453947
WDR36	GCTGGCCGTGCGCCTTTCTG	20	-0.0449812
MCM4	GGACTCACGCGTCTGGGCGG	20	-0.0449269
WDR43	GGTAGAGGCCAAAGCGAAGT	20	-0.0448409
UTP20	GGAAACGGGCTTTGTCTTCA	20	-0.0446951
PRPF18	GATCCTTCGGAAGCGGCAGC	20	-0.0446559
ANAPC5	GCGGGCCCGAGACTTAGTCT	20	-0.0438492
ADSL	GGTATAAATTCCGGACATGG	20	-0.0438218
SNRNP48	GGGGCCCTTTCGGGGACTAT	20	-0.0436043
PAF1	GCGAGCGTCTGGGTGAAGGG	20	-0.0435473
NUP93	gGGTCTCCATAAAGTTCATT	20	-0.0416609
EIF2B3	GCCCCACCGCACTGCTCACC	20	-0.0414866
METAP2	GCTCTCTCGGGCAACATGGC	20	-0.041369
METTL16	GGCTAGATGGCTTCACAAGA	20	-0.0409261
PMF1	GAGGCCGGGCCAGTTAGATT	20	-0.0409128
MCM6	GCACCTGGAGGTCCGCGACG	20	-0.0407516
RPS27A	GTCCTAGTCTGGCACCGGGT	20	-0.0403518
TUBGCP4	GGGGCCGGTGCGCGTGTGGA	20	-0.0401848
LSM5	GCTCAGAGTCGAACCGCATT	20	-0.0400243
RPL15	GTGACTGAACGCGGCTCCGT	20	-0.0395308
MPHOSPH6	ggggcggcgcgcACTACGCG	20	-0.0394156
RPP40	gcggggccgccggcggtacg	20	-0.0393536
SNRNP200	GTGAATAACCTACTGGGGTC	20	-0.0390738
RPL10A	GAAATGCCCCGCGGCGCAGG	20	-0.0388339
SUPV3L1	GGGCCCAAAGTGGGGACGAA	20	-0.0388097
MRPS5	GTCGCGGTAGGCGGTGGGCA	20	-0.038754
KCTD10	GTCCTCCGACTTTTCATGGT	20	-0.0385985
RPAP1	GAAACTGGACACGCTACCCT	20	-0.0383057
MRPS2	GGGCCTGGGACCCCGCCAGC	20	-0.0381787
TUBGCP5	GACAGTTCGAGCTCCGGCTG	20	-0.0380575
UBA3	GTTGTGAGAGAGCGCGGCGG	20	-0.0380288
DKC1	GGTAACATGGCGGATGCGGA	20	-0.0373321
PSMA3	GTCTTTATCCCCTATATGCT	20	-0.0372834
MRPL39	GGACTAATTTATgggaacga	20	-0.0370491
PNPT1	GTCCTTTCCTTCTGCCACGG	20	-0.0370188
AARS	GAATAGGTGCAGCGGGCCCT	20	-0.036961
RPS13	GGCCGAGGGGATGATGTTCT	20	-0.0369461
THOC7	GCTCCGGGGAGAGGTCGGGA	20	-0.0368571
NRDE2	GGAGGGTCGTCAAGGGACTg	20	-0.0367964
MARS2	GCACATCGGGCACCTGTACT	20	-0.0364098
THG1L	GCCGCGAAGAGAACACTTCC	20	-0.0362369
VPS35	GGGCTGGTCTTAATCCCGAA	20	-0.0361738
ATP5B	GTAGGCCTCGCCTCAACGGC	20	-0.0359247
MRPS2	GGTCCCCCCGCGGGTGGCTG	20	-0.0355093
CENPP	GAGGCAGGGCTGGGATCACG	20	-0.0351934
NUBP1	GGCTGTGCGCTTCTGGAGCG	20	-0.0351547
RPL21	GGCCTCAGAGGTCGTTCATT	20	-0.0349046
CTDP1	GCAGGAACGCGACCCGCGGC	20	-0.0347588
SEC61A1	GTTCTGCAGGGGGCCGGTCA	20	-0.0346067
RPL21	GTTTCCCTCAGGCAGCGCCG	20	-0.0345698
INTS8	GGGTCCCGCTCCCCAGGTGC	20	-0.0336681
DKC1	GGCGACTCGGGGAACGGGGG	20	-0.033652
EIF4G1	GCCTGAAACCGGCTCCTCGA	20	-0.0335472
RPL15	GTTGCGGAAGTGACTGAACG	20	-0.033499
POLR2H	GGGAAGGCGCAAGCCCGCGC	20	-0.033328
CEP192	GCACACTGCCCTCCGAAGTC	20	-0.0333049
DERL2	GGGGTGGGGCAGGCGACGGT	20	-0.0331537
BNIP1	GCTTATTCAGGTACTGATCC	20	-0.0329726
EIF2B2	GGCAGCTACCTTAAAGATGC	20	-0.0329094
EXOSC3	GTGCGCGTTGTATGCGGTCC	20	-0.0328576
TTC1	GCACCTGACTGAGCGGAAGT	20	-0.0326334
EEF1G	GCTGGAGAGTAGGGTTCCTA	20	-0.0325503
RBM22	GTCGCCATCTTGAGAGCGTC	20	-0.0323433
CPSF1	GCAGCGAACTCAGTCCGGCC	20	-0.0320864
TONSL	GTCCCGGCGCTCACCATGGC	20	-0.0319332
SSBP1	GCGCGTGATCCTGCGTGGGT	20	-0.0311643
MED19	GCTGTCTCCGTGTCTGCCGT	20	-0.0308046
INTS4	GGAAAACTTGCGTAGGCGCG	20	-0.030746
RPL21	GAAGGCGGTGACGCAAAGGA	20	-0.0307071
SSBP1	GGGATCACTTCCGGCGCACA	20	-0.0305336
CHAF1A	GAGGAGGTCGAGCTGCCGCC	20	-0.0301002
INTS9	GGCAGGTGGCGGAGATTGCAC	21	-0.746557
LLGL2	ggcgggcgccgagggacgccg	21	-0.725937
NOL6	GGAAGCTATGAGGTATAGACC	21	-0.699168
NAA38	GCGGCGGCCAGCTTGAGGATA	21	-0.681219
BMS1	GGCGGTGTCCATGCTGACCTG	21	-0.676837
CENPI	GAGGCGGCATTCGGTGGTCAG	21	-0.654812
HAUS5	GCTGGGCGGTCGAAGAGATGG	21	-0.654068
MIS18A	GCGTCGGTGGCCGACATGGAG	21	-0.642408
POLR2H	GGTGAGAGCGCGACCACAGTT	21	-0.642188
MYBBP1A	GCCCTGACCTGGAAGCGGCTG	21	-0.63516
C1orf131	GCAGAATGAGGGTTGATTCCT	21	-0.633853
RPL26	GGCCGCCGGGCCGGAGATGGA	21	-0.63243
NOP2	GGCGGCCCTCCACGTGCAATC	21	-0.631325
RPL19	GACCAGCTCGCCCTCACCTCA	21	-0.623809
CLNS1A	GAAGCTCATAGCAGCAGAGTG	21	-0.622616
SLC25A27	GGCCGGCCGCGGGTCCCTCTG	21	-0.622607
MED30	GCGACGCCGTGTTGACTTCCC	21	-0.6174
RPP40	GCAGCGTGGCCATGCTCTCCT	21	-0.604539
PDCD11	GGTAGCTGGGTGCAGACGCCG	21	-0.601757
DUT	GAAGGCGAGCGAGGAGACCAC	21	-0.599523
EIF4G1	GCGCGGACTGAAGGAGACTGA	21	-0.596565
NUPL1	GGGAACTTCCAGCCCCAACGG	21	-0.596434
GINS1	GTAGACTTGGACGGGGCATGC	21	-0.586911
DYNLRB1	GAGGCCTCTAAAGCCTGACCG	21	-0.585539
NAE1	GCTGGTGGCGGCGCTCCGCAG	21	-0.584441
CCT3	GTTGAGGTGTAAGCCCTGAGG	21	-0.583434
CENPA	GCTCGCGGCACAGCGTTCTCT	21	-0.582579
CCT2	GTCCCGAGCACGAGCTGTGAG	21	-0.58169
ATP6V1A	GACAGCCTCTGGGTCCTCGGT	21	-0.581205
TREX2	GGGCGCAGCCGGAACCGGCGA	21	-0.578974
ESPL1	GCTCCTGGAGGGAGTGTCGGG	21	-0.574727
NCBP2	GCAGAGAAGCGGACCACAATG	21	-0.573988
TCP1	GTAGCTCCTGGGACATCGCTC	21	-0.573053
RPL31	GGCGCGGGTGCGTGGGCCACT	21	-0.570567
RPS13	GCATGCTCCCGGGTGAGCTCG	21	-0.570111
PWP2	GGCGGCCGCCGGGTTGAGCTG	21	-0.567943
POP5	GCCATGGTGCGGTTCAAGCAC	21	-0.562829
MED11	GCGTTTCTGAGGAGAAACTCT	21	-0.562056
SPC25	GCCTGCGAAGGTAAGGGAGTT	21	-0.55357
COX11	GAAAGGAACGCACCTCCATCC	21	-0.553486
SHFM1	GTGACTCAGGCCTCCGTGTGG	21	-0.553311
POLR2H	GGGGGCCACGAGAGCAGCAGA	21	-0.550068
HJURP	GGCGCGCAGCGTACCCAGCAT	21	-0.54899
MED7	GCTGAGGTAAGTGGGCGGCAA	21	-0.54556
LSM6	GGTTTTGGCTGGGATCATCCG	21	-0.545336
SAMM50	GGACAGAGCGTCTGCTGCTGA	21	-0.54368
RPA2	GTAGCCAGAGCGGCGCAGTGG	21	-0.542129
GATA1	GAGCTTGCCACATCCCCAAGG	21	-0.542102
ESPL1	GGGACTGCCCCGGGCCGCTGA	21	-0.541879
ANAPC4	GGGCCGTGTTAGTCTGCCGGT	21	-0.540847
AURKB	GGCCAGCTCACCTGGGGTCCA	21	-0.540597
HEATR1	GTTGGGCTCCTTGGTACCATG	21	-0.539398
TUBG1	GGCGTGCGGCGCCGTTGCGGG	21	-0.537252
NEDD1	GACCCGCTCCGTCCCCCTCAG	21	-0.536493
PRPF8	GAACTCGGGTTGCGCACTTCC	21	-0.533358
WDR75	GAACATCCGCGTGGTTCGTTG	21	-0.527957
DSN1	GAGACCGCTTCACCCTGATCA	21	-0.527838
HAUS7	GTGGCGGCGACGACTACTCAG	21	-0.52674
TREX2	GTGGCGGCGACGACTACTCAG	21	-0.52674
CAD	GGAGTCGGTCCACGTGGCTAA	21	-0.52507
ATP6V1A	GTGCAGAGACTGTACCGACCG	21	-0.524748
ECT2	GGCGAGCGGCTCCAGAGCCAA	21	-0.519528
RPL21	GAGCCACGCGTAGGCCCTACC	21	-0.518443
HSD17B10	GACAAGATGGCAGCAGCGTGT	21	-0.518239
FCF1	GTGAGAGAAGACGGTCCAAGA	21	-0.516663
POLR2K	GCCGGGTTGTATTTGGAAACG	21	-0.516633
MIS12	GCCAGGGACAGACGGCGCGGT	21	-0.516041
RPL26	GGCCATCACCGAAGCGGGAGC	21	-0.515148
OXA1L	GCTGCTGGGCCCATAGTGTCG	21	-0.514738
DONSON	gcgcgggAAGTCTCTGTAGGG	21	-0.513978
GATA1	GTGTGATCCCAGGGGGTGTCC	21	-0.509227
DSN1	GCAGCCGATACTCCCTGATCA	21	-0.509064
ZC3H8	GACAACCCGGACGCGACGAGA	21	-0.508717
AAMP	GTCGTCGCGCAGAGCTGACTC	21	-0.506008
PHB	GCCAGGGGTTGCTCAGAGTAA	21	-0.505252
HAUS5	GTCGCCGCCGCGGCGCTGTCA	21	-0.503304
MED30	GGCTGCAGCTTCAGGCCGGAA	21	-0.502982
HEATR1	GGTTGAAGGAAAGCCTTGGCG	21	-0.502846
ATF5	GGGCGGGGCGCGGAAGGATCC	21	-0.501122
SMC1A	GCGCCGTACGCCCGAGAACTG	21	-0.500424
XRCC6	GGATAACGGCCCGCTTACCTT	21	-0.500234
SUPT5H	GTGTGCAGAGGTGGCAGTTCC	21	-0.499664
DERL2	GTGTAGGCGCGGCTGACCGGT	21	-0.499558
TANGO6	GGGCTGGACCCGGGACTCTCA	21	-0.499278
AARS	GGCCCTTGGCGGGGGACTCTG	21	-0.498767
RUVBL1	GCCGCATGGTAACTCAGGCGC	21	-0.49847
RPL17	GCCCCCGGGAGGAGAACTCCT	21	-0.49815
POLR2G	GTCGCAGCAAGCGCGGAACTG	21	-0.497723
RBM28	GGTCAGGCCGGCCATGAGACC	21	-0.496826
POLR1E	GCCTGTCTGTCCGCCAAGCAC	21	-0.493868
PRPF8	GGTCGGGCCGAGTGACCGAAG	21	-0.49271
MKI67IP	GGAGCGCCGCGTGGTTAGCGT	21	-0.490599
CENPE	GACAGCAGAGCCGGGAAGCAG	21	-0.486587
C3orf17	GCACGTCCAGCGACCGGAGGT	21	-0.4855
EXOSC5	GTGGGCTCGGCGCGATGGAGG	21	-0.481926
CAD	GGGAAGGACTGCAAACTCCAC	21	-0.481165
NAA38	GGGCGCGCCAGAACCCGGCAG	21	-0.480091
RBMX	GCTAGCACTACTGCGCAACGA	21	-0.478298
AARS	GACGGCGACCCTAGGAGAGGT	21	-0.477985
NEDD1	gcccccgcccAGCAACCGCTC	21	-0.476629
RPP30	GGTCATGGGACTTCAGCATGG	21	-0.476417
GTF2B	GGCTCGGCGGGACATACTAAC	21	-0.475766
PABPN1	GGCGGCGGGCCCCAGTCTGAg	21	-0.47408
HJURP	GCCAGTACCCAAGCGCCAACC	21	-0.472329
EIF4E	GGGGCCAAAGGCAATACTCAC	21	-0.470736
CD3EAP	GCAACCTGGTGCGAGCAGCCC	21	-0.469848
HJURP	GGGAGGGGACGTAGGACGGGA	21	-0.468063
MRPL39	GCCATGGGTTCCCGGGCGCTG	21	-0.46652
CDC20	GCCCTGGAGGAAAGGAGGCGA	21	-0.466393
CAD	GGCGAGTACGGAGAAGCGGGA	21	-0.466199
TICRR	GGCCGAATCGGCAACTCAGAT	21	-0.465832
PHB2	GGTACTGCACCCTTCACACGA	21	-0.463467
SHFM1	GACACAGAAACCGGGGCCCAG	21	-0.463405
MVD	GGTCACTGCGCGGTGGGACCA	21	-0.462903
MCM2	GTTGTTGCTGTAGTGGCGGAG	21	-0.461999
AARS	GGTGCAGCGGGCCCTTGGCGG	21	-0.461168
UTP20	GACTGAGGCAGCGGAGACCCG	21	-0.46003
VARS	GCTGCCGGGGCGGCGATCTTA	21	-0.459462
NOC3L	GGATGAGCTCGGTGTAAGGAA	21	-0.459108
LSM6	GCTGTGGAGCGGCGGCTGCAG	21	-0.457648
GINS1	GAGCTGCATCGCGCGCCCGAA	21	-0.456791
TTC27	GTATCCGCACATGGAATTCTA	21	-0.45522
MRPL24	GGCCCTCACCTCCACTTTCCG	21	-0.453712
SPCS3	GAGCCGGTCCGCCGCCGGAAC	21	-0.453446
MTHFD1	GGTTGTCCTGCTTGGCTGCGG	21	-0.451266
CHAF1B	GCCAGGGAAGCCGTACCTGGA	21	-0.450952
TSR2	GGCTTGGCTAGGCGGCATAAG	21	-0.450041
IMPDH2	GCGGTCCTCGGAGACACGCGG	21	-0.448044
MRPS33	GAGGAAGGTCAGGTCTAGGTA	21	-0.447922
MRPS27	GGTTACGGACAGAGGAAGGGG	21	-0.44566
VARS2	GCAGCGTCTCCCACTTCCCGG	21	-0.443762
PRPF19	GCTGCTGCCGGGACTGCTCCG	21	-0.442424
FBL	GCACGGGTTCCAGTCTCCTGT	21	-0.44224
RPS18	GCACGGATTCCAGTCTTACCA	21	-0.441862
SEC61A1	GGCTAGCACTGACGTGTCTCT	21	-0.441824
NOP2	GTCGGGCCTCCAGGGGGATAG	21	-0.441505
ORC5	GTGGGCCGCCAGACTCGGGAG	21	-0.440649
COPS6	gcggcggcTGCAGCTACGAAC	21	-0.440006
SUPV3L1	GGGCACGGGAGAAGGACATCG	21	-0.43941
CSTF1	GTGCGCTCGGAGCGGTAGATT	21	-0.439074
AARS	GGCCGCCCTCGGAGAGCTCTG	21	-0.437326
POLR1E	GCGGACAGACAGGCGAGATGG	21	-0.43596
PSMD7	GAACTGGGCCTGAAAGGGTAC	21	-0.432589
MED21	GCGAACTCGGAGGTTTGAGGC	21	-0.431842
DNAJA3	GCTGCGCGGTGCTCCACACGC	21	-0.431575
NUP160	GCGGCGGCGGGAGCCCTGGAA	21	-0.431184
MED7	GCGGTCTCTCCGAGAGCGCGG	21	-0.429585
TARS2	GACACCGCCACCTCTGATACA	21	-0.429307
MED30	GAGGCTGTGGGGCCTCAGCGT	21	-0.429129
GINS1	GCCTGCCTTCAACGTGAGGGG	21	-0.42874
RPAP1	GGGGCGGAAGCTGGAATCTGG	21	-0.427328
NRDE2	GTACCTCCGTTCTTCTCTATA	21	-0.426386
NUP93	GCCGCCCCCGAGGCTTGGAGT	21	-0.425892
ESF1	GGTAGGACTGCGGACGGTGAG	21	-0.425861
TSEN2	GCGAGCGCGTGGGGCCAAGAA	21	-0.424677
PWP2	GACCCCCGGGAAGTGTCTCTG	21	-0.424663
RPL36	GGCGGCGGATACCGGCAGTGC	21	-0.424459
NEDD1	GGGAAGTGTCCGGGGAGGCGC	21	-0.423196
POLR2A	GGCCGGGACGGTTGGAGAAGA	21	-0.422158
NEDD1	GGGCCGGGGTCGCGCACCTCC	21	-0.422102
FBL	GACTCCGGAGCCGCACAAACC	21	-0.421928
INTS8	GGCGCGGGCCAGCCGGAGCTG	21	-0.421374
NOP2	GGCGTTCGGTCGGGCCTCCAG	21	-0.420306
WDR43	GCAGCGGGGCCAGAGCAGCAA	21	-0.420284
CENPC	GCGGCAGTCGCCTGAGACTTA	21	-0.419254
RCL1	GAAGACGGAGAGACTAGACAC	21	-0.418797
RABGGTB	GCCCGGCTCCTAAGTCTACCC	21	-0.418551
DHODH	GAGTCCCGCGAGTGAGCAGTG	21	-0.418324
TUBG1	GTGCCTGAGGAGCGATGCCGA	21	-0.418017
RPL21	GGAACCGCCATCTTCCAGGTA	21	-0.415557
TSR2	GCTAGGCGGCATAAGAGGAGT	21	-0.415114
RPAP1	GCCTGGAGCACGTAGGTGGCG	21	-0.413459
NUPL1	GGACTCTGGGCTCCACCACCG	21	-0.412238
MRPL17	GGTCGCTGCAGCGATCTCCCA	21	-0.411944
NUDT21	GGTTATCTGCAATCCCCTCAG	21	-0.411462
POLA1	GGCGCAGACCTTGGTCGTCCC	21	-0.411227
VPS54	GCAGCCTCGGTGCGACGTGGA	21	-0.410861
SMN1	GTTTGCTATGGCGATGAGCAG	21	-0.41041
HSPA9	GCGGATAAATGGAGGAGTACG	21	-0.410163
CWC15	GGGCGGAACCGAGTGCCTGTC	21	-0.408743
HSD17B10	GTAAAGGAAGGCAAGCAACAG	21	-0.407826
POLG2	GGATTCTGTTAACGGTAGTGG	21	-0.407689
CDC16	GCAGCCGCTCTAGGTTCATGG	21	-0.40705
ADSL	GTCCACCCTGGCGGGGTCGCA	21	-0.40644
MRPS2	GCGCGGCCGAGGATGTCGCCA	21	-0.405771
HJURP	GCATGCAGCGGCTGATAGAGA	21	-0.403801
RPS24	GCCATCATGGTGAGTCTCCCT	21	-0.403757
VARS2	GGAATCCACCAAACCCGACCC	21	-0.403603
C9orf114	GCCGTGCGGCCCGGTAAGTGC	21	-0.403503
HEATR1	GGAATTTGGGTATATCTTGGA	21	-0.402977
RPL21	GCGTAGGCCCTACCTGGAAGA	21	-0.402952
LDB1	gggagaaaggcaggcagCCGG	21	-0.40292
LSM5	GGCCGCACCTGCTCTTTAACG	21	-0.402789
CENPE	GCCTGATAGGATGGCGGAGGA	21	-0.402457
TTC27	GCTGTTATGGCCGCCTCCTTG	21	-0.401893
CAD	GATAAGGTCTGCAGCCTAACC	21	-0.401836
ATF5	GAGACGGGCCGGGGGCACAAA	21	-0.401174
NUP62	GAGACGGGCCGGGGGCACAAA	21	-0.401174
POLR1D	GGGGCTCTGTCCCATAGCGCG	21	-0.39969
PRPF4	GGGAGTGTTCGGGTTTCGCTG	21	-0.39872
PLRG1	GGTCGAGGTAAAGTGACACTG	21	-0.398595
RPL11	GCCATGGATGGCGACGGATAA	21	-0.398423
SRRT	GAGACGGAGCTCTTGAGTAGA	21	-0.398061
DNTTIP2	GCAAGCTCGGGTCCTCTCTGT	21	-0.397939
CHMP2A	GAAGCGAGGCACCGGACACCC	21	-0.397653
VPS54	GCTGTAGGTCGGGGTGAGAGT	21	-0.397229
RPL31	GAAGAAAGTGACCAGGCTTAG	21	-0.395651
ANAPC5	GTGCCTTGTGGTGACAACTGG	21	-0.395134
SRRT	GCGCGCGCTACTGCCCATCCC	21	-0.394833
SDAD1	GTGCGGCGCGGCAGACGCTAG	21	-0.394582
BUB3	GCCGCAGCGAGTGGCGAGTAG	21	-0.394069
NOL11	GAGGCCTGCCGGGAGTGAGCG	21	-0.391971
IMMT	GCCGCGGCGGCGCGAGTTAAG	21	-0.391283
EIF2B2	GTAGCTGCCTTCAGCCTTCAC	21	-0.391048
CCT4	GGGCTTACCGTTATTACACTG	21	-0.390927
SMU1	GCAGGCCCCAGCTCTCCCTCA	21	-0.390723
SSBP1	GGGCTAGCCAGCCACACCATA	21	-0.390612
ATF5	GGGGATCCAGCCCTCTCCTTG	21	-0.390344
DNAJC17	GAATCCGTCAGGCCGGAACCA	21	-0.389721
SNRPD1	GGCCGGAAGCGCCTACTCCAG	21	-0.389591
MED21	GGCATAAAGCGCTCTCTCGGG	21	-0.388267
BCCIP	GCTGCGGAACCCCACTTTCCA	21	-0.388057
MIS18A	GCTCCATGAGCGAAGACGCGT	21	-0.388047
RPP40	GCGTGCCCCGCCAGCGGAGGC	21	-0.387923
INTS8	GAGGCCACCCTCCGAACGTCC	21	-0.387618
ARCN1	GCGGCAGCGGTTCCTGTCAAG	21	-0.387389
IMMT	GGTGGACTCGAGCTGCCGCGG	21	-0.386468
ESPL1	GCCCAGCCCTTCAGCGGCCCG	21	-0.38356
SNRPF	GAAACTGCGGCTCGGGACCTG	21	-0.382963
DYNC1I2	GGCTGCTACGGCGAGAGCTTA	21	-0.382893
PNPT1	GAAGGAAAGGACCATCGCTCA	21	-0.382779
TTI1	GAAAGGCTGGAAGACGAGGTA	21	-0.382475
SPDL1	GAGCTCAGGGCGTCCACATTG	21	-0.382431
CCDC157	GGAGCGCCCAGGCCAACCCTC	21	-0.382042
MRPL22	GGCGGCAGTACTGGGACAGTT	21	-0.382042
MED27	GCCACAGCAGCTCTCCAAAGC	21	-0.381682
TWISTNB	GCATGGCTGCAGGTTGCTCAG	21	-0.381589
NEDD1	GCTCCGTCCCCCTCAGAGGGC	21	-0.381502
PWP2	GTGTGCCGCAGCTCAACCCGG	21	-0.380562
GBF1	GTCCGGGACGGGCAGTAGAGC	21	-0.380418
EFTUD1	GACTTTCGGAAGCTCTCGGTG	21	-0.379766
INCENP	GGCCCGGAGCCAAGTGGGTCT	21	-0.379107
SRBD1	GAACCCGCAAGACGACCGCCA	21	-0.378995
NRDE2	GAGCCTCACTAAGCCCCGCAA	21	-0.378554
SMN1	GCGGACCACAACTCCAGTGAG	21	-0.37804
RPL36	GCTGGCGCCGCGCGGAACTCC	21	-0.377424
DDX27	GCACCTCGTCATCCTCGCCTA	21	-0.377392
CDC20	GCCAGGCGTGTTAAAGCCGGT	21	-0.377319
PAF1	GTGAACGCGCAGGCAGCACCG	21	-0.377105
DBR1	GAGACGCTGGCGCTGGCAGAG	21	-0.376308
EIF2B5	GAAGCTGCCACCGCACGCAGT	21	-0.376196
RPS27A	GGGAAACCCCGTGGGCCTGCG	21	-0.375725
DNAJC19	GCACTCACCATGGCTCCGGCT	21	-0.375667
LDB1	gaggctcggagagagcgagcg	21	-0.374753
PHB	GAGCAACCCCTGGCTCGTCCC	21	-0.374567
C12orf60	GTATGGAACCGGAAGAGACTC	21	-0.373754
MRPS9	GGTACGAAACTGCTCCGCCGT	21	-0.373033
GATA1	GCCTGGAGCAAGCATAAGGGT	21	-0.372022
EXOC4	GCTAGGCTCCAAGGAAGCCAA	21	-0.371845
RPS14	GTCTGGAGACGACGTGCAGGT	21	-0.371432
PSMC1	GCCTCTGGCGGGCCGCAGTGG	21	-0.371372
MMS22L	GAGAACGCTCCCTCCCCGGCT	21	-0.369514
MRPS14	GGCAGAGCCGTGGGGGACCCG	21	-0.369503
CHAF1A	GCGGAGGCGCGGGCTCCCCTC	21	-0.369115
MNAT1	GGACACACTCTGTGAGTTGGG	21	-0.368825
TICRR	GATAGGTGAGGAGGCGCAggg	21	-0.368753
RPAP2	GCAGACTACTCTCCCCCATGG	21	-0.368552
DYNC1I2	GGAAAGCCGCGGAGCTGGTGG	21	-0.368241
GPN2	GTCCCAGTACGTATACCTCGT	21	-0.367828
DLST	gccggccgggccgggcACCAA	21	-0.367565
CCT6A	GAAGACCCGGATAGTTCCTCC	21	-0.367252
SPC24	GGTTGGAGCCTGGCGTAGTCA	21	-0.366292
EIF6	GCCGCGTGCGGAGCTTGTTAC	21	-0.366275
RPL27	GCTGCCGGTAAGTAGAAGCTT	21	-0.366218
CHMP6	GGCCGAACAGGTTACCCATGG	21	-0.365257
EFTUD2	GTGGGGCGGAAGCACGATCTC	21	-0.364936
CCT4	GAAGGTTCGTGAAGGCAGTGA	21	-0.364511
RPL10A	GAGAGCCTCCCTCTTCCACCG	21	-0.363533
MED7	GTCTCGGGGCTTCCTCCGTGT	21	-0.36291
CPSF2	GGCGGAGACGAGGAGGAACCA	21	-0.362558
C12orf60	GTACGTTGAGCCGTCCGAGAA	21	-0.362287
SAMM50	GCGGCTGGAGAGGGAACCATG	21	-0.362112
PFDN2	GGTCGCGCCGGCAAGAGCAGC	21	-0.361562
NMD3	GCGCGACCGCACACGGGTTCC	21	-0.361321
SPC25	GGGACTCAGGCCTGCCTGCGA	21	-0.361225
NBAS	GGCAGCGGAGGAGTGTCTCTA	21	-0.360966
XRN2	GACGAGCGTAACCAAAGAGAC	21	-0.360397
MED21	GGTTTGAGGCCGGCTGCCGGG	21	-0.360367
TRAPPC5	GCTCGGCCGAGCAGACTGCTG	21	-0.360257
MNAT1	GTCGCGTCTGAGGGGGCTTGT	21	-0.360094
GEMIN5	GGCAGCTTCTCTTGTCTCTGA	21	-0.360015
HAUS7	GAGCGCGAAACATGGCGGGGC	21	-0.358893
SNRPB	GCCCTAAGTGGCTCCAACCCA	21	-0.358764
CAD	GGCGCATCACAGAGTGGGATA	21	-0.358031
DDX54	GTTCCCAGCGCGCGGCCCGAA	21	-0.358024
SEC13	GGAGCTGCCACGTCCGAGACC	21	-0.357246
TOP2A	GTGGAGAAGCGGCTTGGTCGG	21	-0.357186
AQR	GGAACGCTTGGGCTGTTGTAC	21	-0.356905
CPSF1	GGGACAGCAGCGAACTCAGTC	21	-0.356208
WBP11	GCCGCTGCGCGGGACGTGGAA	21	-0.355941
[truncated: 1,827 more rows]

## Sheet: CRISPRi_neg_select_inefficient
inefficient sgRNAs targeting negatively selected genes in CRISPRi
gene	spacer	spacer length	phenotype score
RFC4	GTGCCCGCGTATTCCTAC	18	-0.0251271
CHMP6	GTTTCCCCATCCGAACGC	18	-0.0227383
PFDN2	GAGTGGCTAACGCGAAGC	18	-0.0220129
NOP2	GGACATTAACCCGCATTC	18	-0.0185068
LLGL2	ggtatgcgccaccacacc	18	-0.0184782
RPAP1	GCTTTCGCCGCCCGTTGA	18	-0.0128469
RPS6	GCTTTTTGGCCGAACGGA	18	-0.0123691
CCT4	GCGCTGGCGTGACGTAGG	18	-0.0110571
MCM3	GTTCGGAAGTTTTCGCGC	18	-0.010235
PRPF4	GTGCCCCCCGGGCGTACG	18	-0.00856509
TSEN2	GGGTAACGGCGAGCGCGT	18	-0.00844074
TTC1	GACTAATAGCGTCGCTAT	18	-0.00798735
WDR36	GGAAACGCGATTCGCAGC	18	-0.00784049
EFTUD2	GCACACACCTCGATTTCG	18	-0.00765336
SMC2	GCTCGCGCCGAAATTCAA	18	-0.00756461
ACTL6A	GCGCCTTTTCGGCGTGTG	18	-0.00697506
CTDP1	GCCCTCTGTCCGCGATGG	18	-0.00548888
RPL15	GCCGGTGGCCGCGTACCG	18	-0.0054108
EFTUD1	GAAAGGTCGAGCGACAgc	18	-0.0034405
SHFM1	GTTTCTGTGTCGCGCGAA	18	-0.00321309
RPL27	GCTGCCATCCGCGGCTTG	18	-0.00254923
EMG1	GGAGGCCGTAGTTTATTG	18	-0.00103436
TAMM41	GGACTGCAAGCACACGCA	18	0.000195726
COG3	GGAACCGTTTCCGGGGTC	18	0.00125172
SRRT	GTTGGACTCGCGCTCGGA	18	0.0019659
SPDL1	GGACGTCTCGTGAGACGT	18	0.00234565
CCDC174	GCCTACCTCCGTCGCAAC	18	0.00312406
NAA25	GACAAGCGAGATCGACGC	18	0.00317271
PSMC4	GGCGTGCGCAGTATCACG	18	0.00329908
RABGGTB	GCTATATCGGAGCGCGAT	18	0.00340305
EFR3A	GACAGTGCCTACGATTAC	18	0.00652808
XRCC5	GTCGCAACTCGCTTCCGG	18	0.00681888
EFTUD2	GGTATGCCCGCCGCGGAC	18	0.00683967
EIF6	GGACTCTATGGTCGCGAG	18	0.00748406
EEF1G	GACATACGTACGACAGTT	18	0.00783194
LLGL2	GTTAATATTATTTACTAG	18	0.00802713
TOP2A	GCCTGTTTAGTCGCTTTC	18	0.00840414
XRCC5	GCTCTGGATCGTACAAGA	18	0.00852389
OGDH	GTGTTGACGCCATACGCC	18	0.00945823
RPL28	GCTGCCAGGATTAGCCGA	18	0.0103223
LLGL2	gtatttttagtagcgggg	18	0.0110435
TBCD	GCGGCCGGTTCGTCGCTC	18	0.0133375
SMC1A	GAACTTTAAGTCGTACAA	18	0.0161675
BNIP1	GGGGGGGTAGCCGACCAT	18	0.0169932
TUBGCP5	GAACTGTCGCGAGAATAG	18	0.0172473
POLR2A	GCTGAAAAATTTCCGGTA	18	0.0175604
NSRP1	GTCACGTAAACTCTCGCG	18	0.0186586
MED1	GTTTATCTCGCGAATTTT	18	0.0226922
USP39	GCTCCCGCTTGACGCGAC	18	0.0248879
HAUS4	GGAACCTCTCGTTCGGGC	18	0.025866
MRPS5	GCTGTGTAGCGGGACGGC	18	0.0341252
MTPAP	GCGTTTTCGCGCATGCGT	18	0.0475286
TUBGCP3	GCTTAGGCAGCCGCACGCG	19	-0.0296669
SUPV3L1	GGTATTTTGGAGCCACCGG	19	-0.0289372
SUPV3L1	GGCCCAAAGTGGGGACGAA	19	-0.0284697
SNRNP48	GAAGAAGGGAGATCCGCAC	19	-0.0279812
C14orf166	GAGAGCCGTCAACTTGCGT	19	-0.0278563
NIFK	gaagcgctaaggcgaggcg	19	-0.0277343
PWP2	GCGGTCTGTTGGATCGGCG	19	-0.0275075
LLGL2	gaggcaggtggatcacatg	19	-0.027275
DKC1	GCGGTCTCGCCCTCCGTAC	19	-0.0272698
EIF2B4	GCGTACCAGTAGGCAGGCC	19	-0.02617
RPL17	GCCTGTTTCAATCCAATGC	19	-0.0260934
HAUS1	GAGACCCGCTGTCGGCGCG	19	-0.0258508
NUBP1	GGCGGAAATGTACGACAGC	19	-0.0254289
MCM2	GCGCCTCGGGCGTTGTAGG	19	-0.0247259
UBA1	GGCTTCCGCCCGGCACAGG	19	-0.0246336
MRPS27	GATTGCTAGGGACGCCATT	19	-0.0246246
MIS12	GGCGAGCGAAAGCAAACGC	19	-0.0237527
PSMD1	GAAGCGAGCCGGCGGCCTG	19	-0.0234911
MTOR	GGACATTACGCCGCCCTAG	19	-0.0230173
CENPP	GGTGAGCAGCGGAGCGCTT	19	-0.022939
ATP6V1B2	GTGCCCACCGGTGGGCCGG	19	-0.0217318
IMPDH2	GTGCTGTGAGTCCGTCGTC	19	-0.0214422
DDX54	GCGCGCTGGGAACGCAGAA	19	-0.0213574
SMC2	GTTCGCTTTGTAGCGGCCC	19	-0.0212395
TTK	GGACCTAAAAGATGCACCT	19	-0.0203615
RPS24	GGATGGTTGTCGAGGGGCT	19	-0.0199216
TTI1	GAACCTTTCTGGCGCGATA	19	-0.0196485
RRP12	GCTTCTTCAGCCGGCCGTC	19	-0.0195706
MRPL17	GGCCGCGTATTTCGCCGTA	19	-0.0183352
SNRNP48	GGGCCGATAGTCCCCGAAA	19	-0.0181279
SNRPG	GAGGCGCTGAGATATCGCG	19	-0.0179076
NOC3L	GAAGTACCGAAAAGAACAG	19	-0.0174837
HAUS7	GTCACCCAGCCACGCTCTA	19	-0.0171762
CIRH1A	GGGTCTCCTTGTCCCGAGG	19	-0.0168489
RFC3	GCGCGGGATTTTCAAGCGT	19	-0.0160741
MRPL17	GTGCGGCACGAACGCATCG	19	-0.0157683
CENPP	GCCACTGCTTAGACAGCCA	19	-0.0157588
EEF1G	GGTCTACAGACTGTACTGC	19	-0.0156125
NUBP1	GTCGCCTTTGCCGCCTTCG	19	-0.0146997
MRPL34	GCGCGCCAGTCTATATCCG	19	-0.0140027
RPL14	GCGCCAAACGGCTCCCAGA	19	-0.0136484
NOP10	GATCGAGTCTATACGCTGA	19	-0.0133631
MRPL39	GAGTGCGCGTTCGGTTTCC	19	-0.0130376
RPL15	GAGCCATTTTCATTCCCGG	19	-0.0129177
NAA38	GATATTTGCTGCGACCCGC	19	-0.0128746
TP53I11	GGTAAGCCCCGGCCGCGCA	19	-0.0124356
SMC1A	GCGACATTTGCCGGTCGCC	19	-0.0114287
UBA1	GTCCGCCATCTTGTGTCGG	19	-0.0113914
CARF	GGTCGGAAGCCGTGCCATG	19	-0.0108953
PSMD7	GCACTCTGGGAGCGGAAGA	19	-0.0108336
RPL36	GAAGCCCTGCAGAACGCAT	19	-0.0108146
MED27	GGGAAATGCAGTTCGCGCG	19	-0.0107226
PABPN1	GGCGCAGCTCTCCAATCGC	19	-0.0106748
RAD51	GGGATACGTTACGTCGACG	19	-0.0105088
ANAPC5	GTGTTCGGCATCAAGGACT	19	-0.010259
RPL10A	GGACACCAAGTAGAGCGAC	19	-0.0097213
RPL12	GGCTTTAAGAGCCCCATAC	19	-0.0097213
IARS2	GCCACTATTCGAGTTCGGC	19	-0.00966615
NRDE2	GGTTTTCGCGGCGCTCTCT	19	-0.00933426
POLR1D	GGTGCGCTTCCTCTCGAAT	19	-0.00910699
CTDP1	GAACTACAGCGTCGCCGCC	19	-0.00778696
GNL2	GCTTAGAATGACTACGAGC	19	-0.00726157
MKI67IP	GGggcggggcgaagcgcta	19	-0.00712683
NIFK	GGggcggggcgaagcgcta	19	-0.00712683
DYNLRB1	GTTCCACCCTCAAGTCGGC	19	-0.0069686
FARSA	GAGGCGTCTGATGGCGGCC	19	-0.00694978
RPL15	GGAGGGAGACCTATCTCCG	19	-0.00687108
EXOSC3	GGGTACCGGAAACGGTGTT	19	-0.00685114
PABPN1	gccatcgccgcTCAGACTG	19	-0.00664213
CENPC	GTTGTTAGCGCGCGCCTTC	19	-0.00652722
NUDC	GTAACGGCCCGCGCGGCGT	19	-0.00643187
NDUFAB1	GTCACCTGCGCGAGCACTA	19	-0.00642501
TBCD	GCGGCCGGTTCGTCGCTCA	19	-0.00605966
INTS9	GTCTTCGCTCCTAGGTCAG	19	-0.00600711
LTV1	GCTGGGTGACGTTATCGCC	19	-0.00587756
CDC5L	GATCTGCGCAAGCGCAAGG	19	-0.00587183
NAA25	GGTTCTGCGCTTGTCATCA	19	-0.0058173
TAMM41	GCAAGCACACGCAAGGATT	19	-0.00577195
EFR3A	GCACCATGACGGCCGTTGC	19	-0.00576321
XRCC5	GTCCTGCTTCACCAGAGGC	19	-0.00555549
PSMD4	GTGATTGGTGAAGAGCGAC	19	-0.00539539
RPL21	GTTGCCTTTCTTTCGCAAG	19	-0.00486695
PSMA7	GCGCTTTTGAGAGTCGCGG	19	-0.00467907
RPL34	GCATTCCAAGTGTAGCGTT	19	-0.0046251
SEC13	GGAATGGTCCGCAAGGACG	19	-0.00459467
SHFM1	GGTTTCTGTGTCGCGCGAA	19	-0.00427549
TAF8	GATGGGACTTGTAGTCgcg	19	-0.00423546
POP5	GCTCAGAACTCGGTCATCG	19	-0.00406393
CSTF1	GACGTCAAGCTTGACGCAT	19	-0.00403839
NPAT	GTTACCCTCGGACGTAGCC	19	-0.00403565
SMU1	GGGATGTTCGCGCCTTGCC	19	-0.00395462
NAE1	GCTTTCCAGCATTCGGGCC	19	-0.00391461
CLTC	GGGGTACATAAGGCGGAGG	19	-0.00383768
CENPE	GCCGCATCTGATTGAGCCG	19	-0.00357937
RPL36	GGGGCCGATGCGTTCTGCA	19	-0.00354812
SF3B2	GAGATCGGAGCTCCGATCC	19	-0.00350334
MVD	GGGTCGCGCGCTGATTCGG	19	-0.0034952
NIP7	GGCGCGAGCGGCCCGATGT	19	-0.00326296
TUBGCP4	GGCTCTGAGCGGGTACCCT	19	-0.00305992
VPS13D	gacccgcgggccgCCGCTA	19	-0.00304347
DNTTIP2	GAAGTCGTGGTGGTCGCGA	19	-0.00295085
RPP40	GGAGAGTGCTAGGCTTcgc	19	-0.00287401
POLA1	GAGGGACAATTCCGCGCGC	19	-0.00279808
RBM22	GCGTAAATAAGACGCCGAC	19	-0.00202035
XRCC6	GGCGTGATTGAGGAATTTG	19	-0.00196595
POLR1D	GCTGTGCCACTCTTGGCGG	19	-0.00166477
RPS27	GCTGATTTCGGATCGTAGA	19	-0.00144333
ZC3H8	GTCCTCCCTTTCGCGAGCC	19	-0.00141857
NSRP1	GCGACTGTATCTTTGGCCG	19	-0.00130543
ADSL	GTGCTTCGTGTTTAGCGAC	19	-0.00102423
TAF2	GTTCCACTTCCGCTGACGT	19	-0.00101021
POLG2	GCGCTCTCGTGTAGCCGTC	19	-0.000946371
ADSL	GGGCGGGACTTCCTTCACG	19	-0.000882931
MRPL34	GCGCCCAACCTGGGGTAGG	19	-0.000871399
MTOR	GCCCTAGAGGGGTCGTGCC	19	-0.000475079
UTP15	GTCATCTTCGCGCGACGTT	19	-0.000402476
MRPL19	GGAGCCGGACTTGCGAGCT	19	-2.18e-05
SEC61A1	GGCGGGCGCCCGACCGCAC	19	-2.27e-06
RPL38	GAACGAGACTTCCGTTTCC	19	0.000467658
ORAOV1	GGCGGGCTGCTTGCCGCTA	19	0.00049749
ZCCHC9	GACCGCCCTCCTGCGGTAT	19	0.000583181
MED17	GTTGCGTTCGGTTTCCCGA	19	0.000688745
EIF4G1	GAGCTAGCTGCTTCGGCCG	19	0.000724333
ZC3H8	GGCCGTTTTGCCGAGGGCC	19	0.000751435
LSM2	GGGTACCGTGACGTCAAAA	19	0.000791535
GART	GCGTCAGACACTAACATGG	19	0.00106226
MIS18BP1	GGCGACCCTAAGCTGTCAC	19	0.00106896
SNRPB	GATTTCCCGCCGCCGCTAC	19	0.00116675
RPL15	GATTTCTGCGCCCGTCGTG	19	0.00146667
SNRPB	GCTGCATTTCCGGTAGCGG	19	0.00147229
WDR36	GCGCTTTTTGCGGGGTTCC	19	0.00170071
EFTUD2	GGCGGGCATACCTCGGAAC	19	0.00176513
CIRH1A	GCACTTCCGACTATGCGCC	19	0.00204895
PRPF4	GGGGTCACCGCCCCCGGAG	19	0.00226783
DKC1	GTGCTAACTCCGGGCGACT	19	0.0025581
DUT	GCACGATGAGCGTCGCCGC	19	0.0026646
DDX24	GCGCGCACGAGTACGTGCG	19	0.00291268
C1orf131	GCACTCACCAAAGTCGTAA	19	0.00310858
RPL15	GCGGCTCCACCGCGGTACG	19	0.00323736
EIF4G1	GGCCCGAACCCGGTGTCCC	19	0.00327881
MYBBP1A	GCACCGGTTTGTGTCGGCT	19	0.00330469
RPL7A	GGTAATATGTATGCGGCCT	19	0.00347383
PSMC4	GGGCTTTTTAGTCCGGGCC	19	0.00351699
NUDT21	GGCCCACTGGAGCTCGGTC	19	0.00364853
PSMD6	GCCATCAGCTCGTCGCGCA	19	0.00370863
ECT2	GTTGACATCACGCGCCAAT	19	0.00385472
DNTTIP2	GACGCATTTCCGGAGCGCC	19	0.00422873
NIFK	GCTAACCACGCGGCGCTCC	19	0.00427955
EIF3F	ggagtggggttgttggtcc	19	0.00430852
VARS	gccgcccgccggTCTCACG	19	0.00436335
RRN3	GGATGTGGGACAAAGCTCA	19	0.00438303
POLR2K	GGAAGTTGGTCTCGACACC	19	0.00445058
NUP160	GGTGGAAGCCTCGCAACGA	19	0.00453124
IMMT	GAGTTGGCGTTTCCGCAGC	19	0.00463887
RPL5	GACGCGCGAGACGGGCCCT	19	0.00474311
CCT2	GGGCGTGTGGCGTCACTTC	19	0.00493755
BUB3	GCAGGGCCGTTCGATTCGC	19	0.00508756
NBAS	GGCGACCGCACAAGCCAAC	19	0.0051173
SPC24	GCAAATTTGACTGTCCGCG	19	0.00532245
TRAPPC5	GCTCGGCCGAGCTGCTTTA	19	0.00537784
ATP6V1A	GAGCTCGACGTCATGTGAC	19	0.00551966
PRPF4	GTGCGTCACTGACAAGACG	19	0.0055573
RABGGTB	GCGTTTTCTGCAGACCTCG	19	0.00578252
RPLP2	GGTTAAACCGCTACCCAGA	19	0.00579611
CCT3	GCACAGGCGCTTGCGCAGT	19	0.00581602
MRPL17	GAGCAAGTTCCGCAACAGA	19	0.00591577
NUP93	GGTCGCGTCCTTGCGACCC	19	0.00604849
SHFM1	GGAGGTAGCTTGGGTGCTC	19	0.00617225
MPHOSPH6	GACAACCTTGTCTTTCGCT	19	0.00654863
SEH1L	GACTTCCACGGGCGGCGGA	19	0.00667839
MED12	GCCTCCGGCGCTACGGGCT	19	0.0067353
BUB3	GGATCCCCTGCGAATCGAA	19	0.00723812
NSRP1	GTAAACTCTCGCGCGGCTT	19	0.00742625
GNE	GATCGCGGATTCGGCACTC	19	0.00747516
EFR3A	gagagaattgctacataga	19	0.0075557
CSE1L	GCTGTCGCGCCATTTTGCC	19	0.00756501
GBF1	GGAAATTGAGGCCGAAGTC	19	0.00763329
XRCC6	GAGACCGACCGAGCGAAGC	19	0.00778674
RPLP2	GGGCCACCGAAACTCGTGG	19	0.00873234
RPS23	GCAAACGCGTCGTTTTCAA	19	0.00880822
TUBGCP5	GCTCGCCCTAAACTTCGCC	19	0.0088908
RPL6	GAATTAAGGTCCCGGCTTC	19	0.00903765
NAE1	GTTTTCCGCGCGGCAGGCG	19	0.00908189
EIF6	GTTGTTCTCGAACGAAGCT	19	0.00908752
RPS24	GCTATAGGCACGCGAAGCC	19	0.00914104
IMMT	GTTACTAGGTGAACACTGC	19	0.00939409
CCT3	GACAGAGAGCGCACGACGA	19	0.00965615
NOP10	GACTTCCGGTTATGCAGGA	19	0.00995761
DDX56	GCCGCTTAAACCGCACTCC	19	0.0100709
TUBGCP5	GCTTGGAAGTCGCCCGGCG	19	0.0108087
DLST	GTACGGTCTGGCCGAGCCG	19	0.0112872
UBA1	GACGTTTTTTTACCAATGC	19	0.012373
OGDH	GACGCCATACGCCGGGGCG	19	0.0130646
MRPL34	GGGATGACGAACACCTGGA	19	0.0137111
UBA1	GAGGGGTTTCCCCGAAGTT	19	0.0137255
PHB2	GGACCCGAACTTCGCGCAC	19	0.0137855
EEF1G	GAACTCCTCTGGCGCCGAC	19	0.0143068
RPS4X	GAAGGGCGAACGCTGGCCT	19	0.0156593
RFC5	GCGACGATCTCAGCGGATC	19	0.0156885
RPL31	GGAGGTGCTTGCGTCGAGC	19	0.0159338
AAMP	GGACTCCATGCGGCGCAAG	19	0.0162483
DYNLRB1	GCTAAGTGTTCGCTACGCG	19	0.0166924
RFC3	GTGACGTCACTACCGGTCG	19	0.0171561
WDR3	GTGTTAAAGGCCGGTTGCT	19	0.0173596
TUBGCP3	GAAGCGCCCGCGCTTTCGG	19	0.0183832
NUP160	GGAAGTGACGGCGACCGCG	19	0.0183894
WDR3	GTGGGCGGGTCCAATCGGC	19	0.0187082
RPL7A	GCGTTGTTCCCGGTGTCGC	19	0.0191276
DCTN3	GCAGAGCCCCCTATGACAG	19	0.0198052
CENPA	GATTTGAACGCGAGCGGCG	19	0.0212717
C1orf131	GCAGAGCGTCAAGAAGTGT	19	0.0223905
MIS12	GTTTTTCCCGGACGTTGGC	19	0.0334168
TANGO6	GCGCCCCTTAGGCCCGCCTC	20	-0.0299302
RPS6	GAGCTTTTTGGCCGAACGGA	20	-0.0299154
NUP93	GAGCGGCGGGGTTCCGAGCG	20	-0.0296872
RPS18	GAAACTGTTTCAGCGCGACC	20	-0.029494
DYNC1I2	GCGGAAATACTTAAGGCCCC	20	-0.0290313
GTF2H4	GTCTCGGGCCGTCGCTTAAT	20	-0.0290149
SUPT6H	GCGTGTTTCTCGCAGGAGTC	20	-0.0289735
SPCS3	GCGATCGTCTCCCACGAGTC	20	-0.0288384
MED22	GGAACTTGAGCCCCTTGTCC	20	-0.0288193
RAD51	GGAGCGTAAGCCAGGGGCGT	20	-0.0285579
RPLP2	GAAGGGCCACCGAAACTCGT	20	-0.0284422
RPS6	GGCGATTGCGGCTGGAGCCG	20	-0.0283637
SNW1	GTCATTCTGTGCCCCGGGTC	20	-0.0276915
TICRR	GAAAGGCTCCCGCGCTCTCC	20	-0.0276406
RPL5	GGCCTTAAATGGCTGCCGCC	20	-0.0271624
PSMD4	GCGCGTGTAGCGCCAAGGCA	20	-0.0269484
POLR2H	GCCGTCCCCTCCGGATGGGC	20	-0.0268734
HSD17B10	GGGCGCTCGTTGATTGGCCG	20	-0.0268281
CHMP3	GCCGCCGCTCCCTACTCTGG	20	-0.0267424
COG3	GGGACGGAATGCCCTGACCC	20	-0.0266481
TUBGCP3	GTTCGGCGACTTCTGGTCCG	20	-0.0265318
RPS4X	GCCGGGGCTGCCCGAGGTTT	20	-0.0264155
SARS	GATTTGTTTCGGGTGGATAA	20	-0.0262744
MRPL34	GACGCAGGGCTCAAGGTAGG	20	-0.0260963
IMMT	GCGGAGTCGGGGACGGTAGA	20	-0.0260582
SNRPB	GGGAGCTTCCGAGTCTGTTG	20	-0.0260124
POLR1D	GCGCAGACACCTAGCCAGCG	20	-0.0258994
RPL31	GCGTGGGTGGCCCAGTGTGT	20	-0.0258944
CHAF1B	GCGCCGCTCCGGAGCTATCC	20	-0.0257754
RPA2	GCCCCTTGCTTCCGCTAGTG	20	-0.0256556
MED30	GCGGCCGCTGTTTTGAAATC	20	-0.0254717
MED19	GCTCCTGACTTGTCCGCGCC	20	-0.0253425
EXOSC6	GAAGAACCAGTGGATGCGGC	20	-0.0253165
INTS8	GCTGGCCCGCGCCGCCATTT	20	-0.0253001
EIF4G1	GCCGCCCAGGAGTGTAGGCC	20	-0.0248197
MRPS2	GGGACGCGGAGGGGCCCGTT	20	-0.0247984
OGDH	GGAGATCGCGGTAAAGGGGG	20	-0.0247748
HAUS5	GCGCCCGTGACGTCAGAGGC	20	-0.0247582
NUDC	GCAGGAGGTAACGGCCCGCG	20	-0.0246543
RCL1	GCGCACTCCCTCAGCTACGC	20	-0.0244621
PSMA3	GCTCTGAGACCGCCTTCGGC	20	-0.0239121
CIRH1A	GCCCGCGGCCTGACCTGCAA	20	-0.023899
RPAP1	GGGCACGGCCCTTCAACGGG	20	-0.0238934
TARS2	GAGGAGGAGTGGCGTGAGGC	20	-0.0238792
POLA1	GACAGTGGCATGATTGCCGG	20	-0.0236046
MTHFD1	GTGCCCGGGTTCTCTTTCTT	20	-0.0235366
GTF2B	GCCGGCTTTTAGGCGGCCTC	20	-0.0234835
CENPC	GTTATTGCTTGGCCGCGGCC	20	-0.0233743
UTP20	GCGCCGCCATGTTGGAGACA	20	-0.0231062
WDR75	GCCTGGCGGATATCGGCTTT	20	-0.0230443
MYBBP1A	GCATGCGCCGTGCCCTGACC	20	-0.0228435
LTV1	GGTCCGTTTCCACGGCCGGC	20	-0.0226884
IARS2	GTTGGGGGCTGCGCCCTcgc	20	-0.0226433
C9orf114	GGCGTGAGAACCAGTGGCGT	20	-0.021986
GTPBP4	GTCCCACCTGCGCCCGACGG	20	-0.0218519
UTP20	GACGGCCTCGGGAGTGTCGA	20	-0.0218371
RPLP2	GTGGCGGCCGCGCTCCATGT	20	-0.0215145
RBM28	GGCCGGCCTGACCTTATTTG	20	-0.0214114
CHMP2A	GGGGACACATAAAGGGGGAC	20	-0.0213957
DDX24	GCGATAGGAACCCGGGTTCC	20	-0.02113
TTK	GTAGAAGCGACAGTCGTGAT	20	-0.0209971
C3orf17	GTAAACGCGTGGGACTGGGA	20	-0.0209527
CCDC174	GTCGCTGTCGAAGACACTTC	20	-0.0206666
DYNC1H1	GCAGCGGCACCAGCTTGCGC	20	-0.020374
SCO1	GCGGAGGCGTGGCGTGCCTC	20	-0.0202894
MRPL24	GGTGCAAATAAACCCTGGGG	20	-0.0202661
DHX8	GCAAGTTCTTCCGCGGGGCC	20	-0.0199348
NAT10	GGCTGGGATCCCCCGGGCTC	20	-0.0197821
EIF3A	GCCACGTGACCTCCCCGCGG	20	-0.019631
UTP6	GCCTTCCCCTAAGTAGGAGG	20	-0.0193916
ACTL6A	GGGAGGTGAGTGAGTGCGGC	20	-0.0193031
RBM22	GCGCTAGCCTCGGGGCTTGA	20	-0.0192691
XRCC5	GGTTCGGAAGCAGGAATCGT	20	-0.018991
SEC61A1	GGCGCCCGACCGCACGGGTG	20	-0.0187954
MRPL24	GTTTATTTGCACCGGAAGTT	20	-0.0185738
C14orf166	GGCGAAGGCCGCCGTCATTT	20	-0.01857
IPO13	GGGCAGCCCGCGCCTTGCCG	20	-0.0183549
TTK	GGACGGCTGCTCCTAGCATC	20	-0.018331
MRPL22	GCAGAATACTAAAGATGCCT	20	-0.0182315
MTOR	GGAGGTGGGCGTTGCCTCGA	20	-0.0182158
PLRG1	GGTCTCTTCTTCGGGTTTTC	20	-0.0180226
MARS2	GAGCCCGAACTGTAGTAGCG	20	-0.0179498
RPS27	GTGTGCTCTATATAAGGGGC	20	-0.0179441
GPN3	GAAAAGTAGGAGTTCGTGGA	20	-0.0178778
MCM4	GAACGTCCGCGCTGCGGAGC	20	-0.0176666
ATR	GCGGCTTCCGGGAGGAGTTT	20	-0.0175906
MED1	GAATTTTGGGAAGTTCCGTT	20	-0.0172638
MIS12	GCTTCAAATCGTCACCCTCA	20	-0.0172231
RPLP2	GAGCCACGCGCGGCCTCGCC	20	-0.017189
TTI1	GCAGGATGTTTCCTCAATGA	20	-0.0171769
RPL4	GTTCTTAGGCGGGGCAAGGT	20	-0.0169026
DHX15	GCCGCCGCCATTTTAGCTGT	20	-0.0167359
MINOS1	GCTTTTCGCCCCAGCAGGCC	20	-0.0167138
DDX54	GGGCCCGGAAGGTAGGCGCG	20	-0.0166761
GART	GGCTTTCAGGCGCTCTCAGG	20	-0.016621
MTPAP	GTTCCGTCCCACAGCGGGCG	20	-0.0166004
SARS	GGAGAAGCGCTTCAAGGACC	20	-0.016539
TONSL	GCCTCCGCGCCCCCGGAGGA	20	-0.0165131
EIF3H	GAAACGTGAGTTACCGGAAG	20	-0.0164145
PSMD7	GCCCGCCGCGCGAGGCACTC	20	-0.0163371
RPS5	GTGAGACCGCCGCGGGGCCG	20	-0.0162802
CSE1L	GGGGTTCGGGTGGTGCGCTC	20	-0.0161719
POLR2K	GGGGTTTGTGGTGGATATTT	20	-0.0160455
NOC3L	GTCTAAGAAACCCATTCCAT	20	-0.0159568
MRPS18A	GGGGCTTTTAAGCACGCCTG	20	-0.0158657
IMMT	GTTCACCTAGTAACCCCTTC	20	-0.0158549
NKAP	GGGGGCGCTCTCGCGAGCCT	20	-0.0158061
ORAOV1	GCGCACGCCCAAGGGACGCC	20	-0.0157774
INTS9	GACCTCTTTTTTTCCTACGT	20	-0.0157049
KIF23	GCATGCGCGTTTGGGCGGCG	20	-0.0153075
FBL	GTTGTGAACGCCGCGGACTC	20	-0.0152768
NBAS	GTTGGCTTGTGCGGTCGCCT	20	-0.0150879
MYBBP1A	GGAGACGCGACTTGCGGCCA	20	-0.015044
OGDH	GGGGTTGGAGATCGCGGTAA	20	-0.0148667
PNPT1	GCCTGCGTTGACCGCGTGCC	20	-0.0147071
CD3EAP	GTGAAATTGAGGTCGCCCCT	20	-0.014606
GART	GCCATGTTAGTGTCTGACGC	20	-0.0144295
RPL28	GTCTCAGGTCGCCGCTGCGA	20	-0.0144221
WDR3	GGCCAGCCCGTGCACACGCA	20	-0.0142621
RPS27A	GCACCGGGTTGGATTGTCGC	20	-0.0142012
RPL5	GGGCCCGTCTCGCGCGTCGC	20	-0.0141637
EXOSC5	GGGTCCAGCCCTCGGGGTCC	20	-0.0141208
CDC16	GCGCGCCTAGCGGCGGAGTG	20	-0.014118
GPN2	GGAAACGGCGAGCCAACGAG	20	-0.014091
UTP15	GTTAATCTGGCATGCTCTTC	20	-0.0140512
DBR1	GGTCCCTCTCTCGCGAGATC	20	-0.0139602
GNL2	GACACCCGCCTGAACCACGC	20	-0.0139253
MED12	GTGCCTCCGGCGCTACGGGC	20	-0.0138535
NCBP2	GCAAACGCCAAGTGGGGCCC	20	-0.013736
POLR2H	GCTCCGCCCGCCGGCCCATC	20	-0.0136556
OXA1L	GGGGCCTGGTTCACTGGGTC	20	-0.0136049
HAUS7	GAACGCTGGAGGTTGATTGG	20	-0.0131887
TREX2	GAACGCTGGAGGTTGATTGG	20	-0.0131887
METTL16	GAGGGATGTGTCCAATCACG	20	-0.0131716
PNPT1	GGCTCACTCCGCAGACCGTG	20	-0.0130837
ASCC3	GCACGTCGACTCGTCGACTC	20	-0.0129927
NOL6	GTTAGGCATTTCCGCCCACG	20	-0.0129296
XRCC6	GCCTTAAGTGTGCGAATCCG	20	-0.0127592
BCCIP	GAAGGACACGCTCCCCTAGT	20	-0.0127587
POLD3	GGGGAAACGACCCGGGACCT	20	-0.0126983
RPS19BP1	GAAACCCGAGCCCGAACAGA	20	-0.0126312
COPS6	GAACCCCTGAAGGAGGTCTC	20	-0.0124277
RPL31	GCGTCGAGCAGGGCCGGCAC	20	-0.0123733
NUDC	GAGTGCAGAGCTCCGGGACG	20	-0.0121944
THOC7	GCGCTCTGGCGAAGAGGCCG	20	-0.0121006
TCERG1	GCCGACCCGACGTCTCCTAT	20	-0.0120983
AAMP	GATCCGCCGCTTGCGCCGCA	20	-0.0119561
NUDT21	GCTCGCAGACCGGCTGGCCC	20	-0.0117628
RPL28	GAGGCCCGCTCGGGTATTTT	20	-0.0117427
DMAP1	GCCTCCGCTTAGGTCTGGAT	20	-0.0116528
MED17	GTGGGGGGTCCTCCCACCGC	20	-0.0115996
HAUS1	GGGGCGGGAATGGGGATCGT	20	-0.0115639
RPLP2	GTGGGCGGCGGGGTATTTTT	20	-0.0113742
THOC7	ggcTCAGGCGTCGGAGCAgg	20	-0.0110099
SNW1	GGAAGGAGTGCGCGATGCGC	20	-0.0109766
NDUFAB1	GCCGGCCTTAGTGCTCGCGC	20	-0.0108768
NUP160	GGTGGAAGCCTCGCAACGAA	20	-0.0108392
EFR3A	gaaattgactgacatatgta	20	-0.0108187
RPL8	GCCCATGCCGCAAGGCCGCA	20	-0.0108032
PNISR	GTTCTTGGTTTCTGTGGCGA	20	-0.0107226
NMD3	GTGGGTGGCCCTCGGGCGCC	20	-0.01065
FARSB	GCTTCCAGGGCGCTAACGGC	20	-0.010618
RPL31	GGTTGCGTCTTAGTGACCCT	20	-0.0105576
EXOSC3	GAATGCTAGAGCGTGCTCGC	20	-0.0103707
ATR	GATCCCAGCCATAGCGCAGC	20	-0.0102947
EIF4E	GGAGGTCAGGTCCAACATGA	20	-0.0102702
RPS27	GCCCCTGGTGTCTGCGCAGC	20	-0.0102156
CLSPN	GCCTTCTAAGCCCCCGTGGG	20	-0.0101963
NUP54	GTCGGAGAGTCTCGGACAGA	20	-0.0101671
FIS1	GGAAGCCGAACTACGGCTCC	20	-0.0101157
MCM10	GTCTCTGCGCGGGTTGCAAG	20	-0.00978496
MINOS1	gggcggctcgccctggccgg	20	-0.0097213
MRPS2	GCCTTAAAGGCGCCGCGCGT	20	-0.0097213
MRPS2	GAGGGGACCCGTTAGGGACG	20	-0.0097213
PET112	GCTCTCTCCCCTAATCTGGT	20	-0.0097213
RPL28	GAACCCTCCGGAAACGCTCT	20	-0.0097213
RPLP2	GCTCTTATAGCGTGGGGCGA	20	-0.0097213
NKAP	GTGCATCAATATAAATAAGC	20	-0.00971866
NUP160	GCCCACCCTCATTCTCCCGG	20	-0.00971643
RPL23	GCGAGGTGAGGTTTTGTTTC	20	-0.00961513
GTPBP4	GTACCTCAACCGCCCGACAG	20	-0.00950988
OGDH	GGGTTGGAGATCGCGGTAAA	20	-0.00938577
SCO1	GCCTCGCGGACTCGAGTTTT	20	-0.00938009
TANGO6	GTTTCCTCAAGAACGTAATG	20	-0.0093502
EFR3A	GGGCCGCGGAGGCCGGAACG	20	-0.00930806
TUBGCP5	GACGTGCGGGAGCTCGTCCG	20	-0.00922076
IMPDH2	GCACAGCAGCTCTTCAACTG	20	-0.00913538
TREX2	GGCCTCAGTCTCCCCGTCAC	20	-0.00909004
EIF4G2	GTCGAGCGACCCGGGCCTCG	20	-0.00906414
SNRPB	GAACTCCAGGGCTAGTGAGC	20	-0.00902886
RPS6	GGACGCCACCATGGCGCTCC	20	-0.00897496
CCT2	GGGCCCCGCCCCCCGAAGTA	20	-0.00894962
EIF3A	GCGCGTTTGAGGGCATTTTC	20	-0.00894431
TTK	GTGAGAGGAATATAGGGGCA	20	-0.00892695
RFC3	GCCGCGTAAATGATTTTGGA	20	-0.00892593
IARS2	GTTGCCGGACCATGCGTTGG	20	-0.0089028
NOP58	GTTCAAAAACACCGACTACG	20	-0.00878983
SNRPB	GCTTCTGCCGAGCAGAGGCG	20	-0.00867959
TUBGCP3	GTGGGAAGCGCCCGCGCTTT	20	-0.00857639
MIS18BP1	GCGCCACCGTGCGTCTCACA	20	-0.0085094
RPL5	GGCGCAGTATGTAGCGCGGA	20	-0.00849043
SRSF1	GCGGCAATCGTTGTTCCCTG	20	-0.00846799
CHAF1B	GGAGGGGCGGGGCGTCTATG	20	-0.00845175
PSMA1	GCTACCGATAACCCCTAGCC	20	-0.00839152
PSMA1	GTTGAATCCCGATCTCTGGA	20	-0.00838275
RPS29	GCTTGGGAGTCCCGGGATGC	20	-0.0083416
SNRNP48	GGGCTGGGACCTAGATAGTC	20	-0.00827771
RPL19	GCCCTAAAGCGGCCGGTCCC	20	-0.00825458
MKI67IP	GGTTGCACGGTTTCCGGCCC	20	-0.00816549
RPL23	GCTCTCTCTCTCCGGCCTGA	20	-0.00814111
RPS5	GGGATAGTGCCCCGCGGCCT	20	-0.00809645
CCT4	GCGAGGAGGATGCGTGCGGT	20	-0.0080792
ATP6V1A	GTAGCGGGAACGACCACACT	20	-0.00798586
PSMC1	GCTGACCAAGTTGTGCTCCA	20	-0.00797713
GPN3	GTTCGTGGAAGGCGGGAGAT	20	-0.00796245
FIS1	GAACCACTTCCGGCGTCCGG	20	-0.00794276
CTNNBL1	GCTCCGCTCGCCGCACTTTA	20	-0.0077813
GINS1	GGCTTTTTCGCAGAACATGG	20	-0.00756022
MYBBP1A	GGGGCCGCTCTGGGACGAGT	20	-0.00752301
PSMC4	GGGACTTGGGCTTTTTAGTC	20	-0.00740856
WDR33	GGCTCGGCCGTTGCGTGCTT	20	-0.00733479
UBA1	GGCTCCAAATACGCCCATGA	20	-0.00729283
POLR2K	GGTAAGCGAATTGGCGGGTT	20	-0.0072814
ZMAT2	GTTCTAAACGAGCTAAGGAC	20	-0.00726612
CD3EAP	GACGATGGGGGCGACCCATC	20	-0.00725609
NUP62	GAAGTAGTACGGTGGGCCGA	20	-0.00718954
NCBP2	GAAATCCGCAAACGCCAAGT	20	-0.00712343
EFTUD2	GTTCCGAGGTATGCCCGCCG	20	-0.00710195
ZNF574	GGGGGAGCCTGTATTGGTTG	20	-0.00709274
ECT2	GAGCAGCTTAGTTTTTGAAT	20	-0.00704461
POLR2K	GCGTGGCCAGACAACCCGGA	20	-0.00700128
TTC27	GTTTTGGCTGCAGCGGTGTC	20	-0.00694001
MRPS27	GGGTTACAGCTCGACCTCTC	20	-0.00690985
MRPL34	GCAGCGTGTTGACCGTCTCA	20	-0.00690541
GNL2	GGTGCTCCGTCCTTTGTACT	20	-0.00686209
RPL23	GCAGTGCTCTCGCGGTGGCC	20	-0.00679391
WDR36	GAGTAGAACTAATTACTTGT	20	-0.00665551
WDR70	GCGGCACCGCCCTACCGGAC	20	-0.0066302
EFR3A	GCTTTATCCCAAGTAGCCAG	20	-0.00661395
COG3	GAAACGGTTCCGCAGTGTGG	20	-0.00659693
MRPS27	GTTGGCCGGACAGCTTCATT	20	-0.00658008
KANSL2	GCGGCGCAGCGCAGCTCCTG	20	-0.00656846
INTS4	GGAAAGATCCAGAACCGATC	20	-0.00652578
EIF3F	GGCGAGAAGGAGAACTTAGC	20	-0.00647965
MIS12	GCGTATCAGTCGGAATTTTG	20	-0.00646283
PRPF8	GGCGTTTAAGGCCGGGCTGC	20	-0.00646057
SMC2	GAACAGAACAACTCTCTAGC	20	-0.00645559
PHB2	GCCGGCCTCAAGATCAGACA	20	-0.00641444
THG1L	GAAGAGAACACTTCCGGGGC	20	-0.00638618
DDX21	GACACTGCGAAAGCAAACCG	20	-0.00636582
KANSL2	GCGAGCGCCATTTTGTCCTA	20	-0.00635295
HEATR1	GCGGCTCTGTGCCGCTTACC	20	-0.00623051
POLR1D	GCCTCCGCGCCTCGCGCTAT	20	-0.00619508
CDC23	GCGGGCCTTACCCGGGAGCG	20	-0.00614092
NEDD1	GACTGTTAAACTTCGGCGGC	20	-0.00609768
PFDN2	GGTCTGGAATACTAGCGAGA	20	-0.00608791
HAUS7	GAGAGCACCGGGGAAATCTG	20	-0.00602564
RPL27	GCATTCCTTCCCTAGGTCTC	20	-0.00598353
RPL6	GAAGGCCTCTCAGTTAGCCT	20	-0.00594339
RPL28	GGAAATACTCCGTCTTCATT	20	-0.00589093
EIF4G1	GCCGCCCGCCTGGCCTTTTA	20	-0.00587511
SLC25A27	GGGACTGCTAGGAAGGTTGC	20	-0.00587494
RFC5	GAAGAGGTCGGGTTGGGGTC	20	-0.00580376
PSMD6	GCCGGGTGAGGCGTTCCCGG	20	-0.00579816
CEP192	GTTTCGGCTGCCGGACCGAC	20	-0.00578763
DDX56	GCCCAGATCGGTGACAGCCT	20	-0.00576631
GNL2	GCTGGCCTTGGACGGGTTGA	20	-0.00556863
WDR3	GGCCTTTAACACGCCCGTCT	20	-0.00556276
PSMC4	GGAAGGGCAGGATAGGACGA	20	-0.00552079
C9orf114	GAGGCGAGTCTCATTGGCAG	20	-0.00551128
EEF1G	GGTATCCAGTGGCGCTGAAT	20	-0.00550007
DYNC1H1	GCAGAAGCACCTGCGCAAGC	20	-0.00544836
NPAT	GTATTGGGTAAGCGCGGACG	20	-0.00543165
HSD17B10	GTTGATTGGCCGAGGCGAAG	20	-0.0053836
GART	GTTTGTAAATGCGGTGGGTG	20	-0.00538072
EXOSC6	GCTGCGATTCTTCAGGGCCG	20	-0.00532922
RPA2	GGCCGAGAAGGTGCGGGTCT	20	-0.00526863
DDX54	GTCCTCCGAGTCGCTGCCGC	20	-0.00523557
EIF3F	ggctgcacccagaagcgatt	20	-0.00505321
CD3EAP	GGCGCCCCCAGGGGTTGGAT	20	-0.00502164
RPL28	GAACTATATAAGCCTAGCCC	20	-0.00493928
EIF4E	GTCTTCTTCATTAGAACCTT	20	-0.00492564
RPL39	GCTTCCGATGGGCGGAGTTT	20	-0.0048778
DONSON	GTCATGGCCCTTTCGGTGCC	20	-0.00477141
TPX2	GCGGTGCTCGGTCGCCGCCT	20	-0.00474424
CENPA	GCGAGCGATTTGAACGCGAG	20	-0.00471692
MYBL2	gcccgcccgccggcagagcc	20	-0.00462133
ZNF574	GATGAGAGGCAAGAAGACCC	20	-0.00459904
EIF4G1	gtggccggtcccggcccgga	20	-0.00459851
AAMP	GATCCCGGTCCGCCGGACCC	20	-0.00453956
TREX2	GACAGACGGGCGGTTTGACT	20	-0.00451554
THOC7	GCCGAAGCGCTCTGGCGAAG	20	-0.00448288
SRBD1	GAAGTTTTTCAAACGCCAGA	20	-0.00445617
PSMC1	GCTCCAAGGGCTTGTGCGGG	20	-0.00441356
EIF4G1	GAGACCTGGAATTTCCGGTC	20	-0.00439701
CLSPN	GGCGGGACGGGATGCCCGGT	20	-0.00439103
TREX2	GCAGGGACCTTTGGCCCCTT	20	-0.00435757
CENPT	GTCCTGCTACCCACCTACGA	20	-0.0043329
RPL7A	GGGTAATATGTATGCGGCCT	20	-0.00428775
RPL32	GTGGCAATCCGCATTCCTGC	20	-0.00414306
TP53I11	GCCTCAGCGCCGGTGTCCCC	20	-0.00413876
UTP20	GCTCCTCCTTGTCTCCAACA	20	-0.00410755
RPLP2	GAAGGCAGATGCCGTCCCTT	20	-0.00408524
DHODH	GGGGCGGGCTTAATGACGGA	20	-0.00405554
TREX2	GCCCTCTCCCAAGATCGAGT	20	-0.00403213
AARS	GAGCTTTCCCCCCAGTCTGC	20	-0.00400672
TWISTNB	GCGACAGCGCGATGTGCCTT	20	-0.00395971
NUDC	GCCGGAAACACGCACGCGCG	20	-0.00394713
MCM6	GCCGCCCACACGGCACCGCC	20	-0.00391245
PRPF8	GCCTAACCCCTTCGGTCACT	20	-0.00390546
XRCC6	GATCTCATTGGGCGTGATTG	20	-0.00388675
BCAS2	GTAGCTGACTCACTGCTAGC	20	-0.00383101
TUBG1	GGGTCAATGGGATCTCGCTG	20	-0.00370662
CLNS1A	GTGCTGAACGGGAAGGGCCT	20	-0.00367286
SF3B2	GCGCGACCAACCCGGAAGCT	20	-0.00361097
TUBG1	GTCCACTTGCCCAACCCCGA	20	-0.00357293
RPS27A	GGTGAAATCTGCGGAAGCGG	20	-0.00355661
GTPBP4	GCGGCCAGACGGTCAGGCCC	20	-0.00346499
CPSF1	GCCGCGTGAGCGTGGCTGCA	20	-0.0033861
RPA1	GGTCGGCCAACTGAGCGAGG	20	-0.00326288
ORC5	GCTGCCGTCACGCCGCAGCC	20	-0.0032615
SEC13	GAGCTGTTCCGAGGCGCCGC	20	-0.00323395
MCM6	GCGGCGGGTGTTCCGGAACC	20	-0.00323086
CARF	GACTTCCCATGTCGCCTTGT	20	-0.00322546
XRCC6	GAGGCGGCACCTCGCGTTTG	20	-0.00319122
SPCS3	GCGCGCTCGCGTCGGAGGAC	20	-0.00317722
RPL3	GGCGCCGGGGGTTTGCTTTA	20	-0.00315851
TWISTNB	GCGTCAACGGCGCGCGCCGT	20	-0.00314026
CLSPN	GGAGCCGCAGTCCTCCCGCC	20	-0.00310961
NAA38	GGCCGCCGCGGGCGTGAGCC	20	-0.00305145
DDX54	GAAGGTAGGCGCGTGGGGCT	20	-0.00303621
EIF3H	GAGACTTGTACTTCCGCTTC	20	-0.00295
UTP3	GTCCTCAATCGTACGCCACG	20	-0.00287125
CPSF2	GCGTTGGGGGAGGCCTGACG	20	-0.00271183
IMMT	GCTGCGGAAACGCCAACTCC	20	-0.00262711
DHX15	GATGTCCAAGCGGCACCGGT	20	-0.00261535
PSMD4	GCTCCTTACCTCCGGGGCCA	20	-0.00256831
MRPS9	GACGAGCTGTCGCGGATCGC	20	-0.00254556
CWC22	GTGGGTCTTCTCGCTACGCT	20	-0.00253257
CASP8AP2	GCAAGCCCTGAAGCTGCACC	20	-0.00250831
SKIV2L	GGGGGTAGCACTACGGGGAA	20	-0.00249178
RABGGTB	GGCGCATCTGCGCAGGCGCC	20	-0.0024776
ECT2	GAAATTGATTGTTTTAAAGC	20	-0.00244532
NUP160	GCATTGGTACGGAAATGGCC	20	-0.00232641
THG1L	GGCGCCCCACATTCTACACG	20	-0.0023177
RPL30	GAGAACAGGACAGGAATTTT	20	-0.00227906
RPS14	GAAGGCCCGTTTTGCTTTCA	20	-0.00223495
PSMA3	GGATGCCGCAAACTAGTAAC	20	-0.00220321
KANSL2	GAGGCCGATCTGAGAGCCGC	20	-0.00216024
POLD3	GGTCCTGGGCCCGGCTAGGG	20	-0.00213771
POLR2B	GTTTGGCAATATGTACGACG	20	-0.00209569
MED18	GTTTAATTGGATACGTGTTA	20	-0.00206997
NDUFAF5	GAACCCTGAATATTTTCGAC	20	-0.00204901
AARS	GTCCAATCAGAGCGCGCCGA	20	-0.00204549
MED30	GTTTTGAAATCGGGCCGCGG	20	-0.00199102
NOL8	GGAAGAGAGGATGCTCCGTT	20	-0.00198362
MRPS14	GCCGAATAGCGCAGGACACG	20	-0.00195875
SEC13	GGCCACGGTCGCGGCCTTCA	20	-0.00195074
SPCS3	GTGATGGCGGCGCTCACCTT	20	-0.00190627
CENPE	GCTCAATCAGATGCGGCGTT	20	-0.00190475
EEF1G	GTGGGGCCAGTCGGCGCCAG	20	-0.00181706
XRCC5	GACTGGGGATCCGGAGAGGG	20	-0.00176871
RBMX	GCCCCTATCGCCGAGCTCGT	20	-0.00172246
RBM22	GGCGTCTTATTTACGCGTCT	20	-0.00171076
MCM4	GCTCGGGGGACTCACGCGTC	20	-0.00146855
WDR5	GTTGAGCGAGATGCAGAACA	20	-0.00146298
MRPL34	GCTCCCAGAGCAGGAATTCG	20	-0.00140326
PSMD4	GCCAAGCCGAGGTCTGTGAT	20	-0.00137037
SMC1A	GGAAACGCCGCAGTGCAAGC	20	-0.00133651
RPL30	GACGGTGAGTGAGGCGGGCC	20	-0.00133157
CHMP2A	GATGACGCGGGCCGGTGCAC	20	-0.00133007
EXOSC2	GATACAATCACTACGGACAC	20	-0.00132992
MED18	GTGTGCTTCTAGTGTTTAAT	20	-0.00131967
CDC16	GCGGCCCCGACTCGGGGTGC	20	-0.00129781
TUBGCP5	GCCTGGTCCAACTTCAGGTG	20	-0.00120854
RPL10	GAAAACAGGTGCGCTCGAGC	20	-0.00120332
PDCD11	GTGCAATTCTTCCGGAAGTG	20	-0.0011819
RFC3	GGTAGTGACGTCACGAGATT	20	-0.00117489
EIF4G2	GCTAAATAGGATTTCACCAA	20	-0.00110479
MCM6	GCGCGCAAAGCTGCAGCGTC	20	-0.00108395
RPLP1	GACCAATCGGCGCCCGCACC	20	-0.00106535
WDR5	GCAGTGACATTTAACTGAGT	20	-0.00100988
CHMP2A	GGACACCCGTTTCCGCTTCC	20	-0.00098439
RPL36	GAAGCAGCCCGGCCGAAATG	20	-0.000932602
CSTF1	GCCGTTGGCTCCACCACTTC	20	-0.000890988
MRPS2	GACCCACCCGCAGAGGAACC	20	-0.000755328
TTK	GGGAGATGTTTTTACCCCTG	20	-0.000750841
TAF8	GCGTAGTGTGCGCGAGCGCG	20	-0.000669695
VPS13D	ggacccgcgggccgCCGCTA	20	-0.000613426
CCDC174	GACACTTCCGGTTGCGACGG	20	-0.000579177
NDUFAB1	GCTGCCCCGGGTCCGGATGC	20	-0.000553645
RFC3	GACTCACCAGGTTCCGCAGC	20	-0.000288645
ACTL6A	GACGAGAGAGCGCGCCTTTT	20	-0.000214805
MPHOSPH6	GAGCGCCACTCCGGGCGGTA	20	-0.000189137
NUDC	GGGCGGAAGGAGCGTGGCCA	20	-0.000188419
NAT10	GGTACCCAACGCGGGAGGGC	20	-0.000156893
EFTUD2	GTCTTGGGCTACTCGTCTTG	20	-0.000122448
COPB2	GCCCTGCGCGCAGTTTGCGC	20	4.36e-05
GTPBP4	GGGCCGCCTACCTTGGCGGA	20	5.88e-05
EIF4E	GTGTGCGCTACACGCCGCCT	20	7.74e-05
BIRC5	GATTCAAATCTGGCGGTTAA	20	0.000110024
CSE1L	GCTGTCGCGCCATTTTGCCG	20	0.000179347
SMU1	GCCACCTCCCTCGAGGTTTT	20	0.000181725
NUF2	GCCGTCTTCCTGTCGGCGGC	20	0.000276719
NSRP1	GTGGCCCGGATCCTGCTTGT	20	0.000370867
RFC5	GACCTCAGCACTCAAGCAGC	20	0.000446213
SRSF1	GCTTTTCGTCACCGCCATGT	20	0.000459307
PMPCB	GCTTCCGGGGTCGCGACCTG	20	0.00057048
TREX2	GGCAACAGGTCCTCTTTGCC	20	0.000582467
RPLP2	GTGAGTGTGGTGACCGGGCC	20	0.000606993
C1orf131	GGCTGACCCCACAATGTCGC	20	0.000657468
RPL5	GGCCCCTGCGACGCGCGAGA	20	0.000676355
RPL15	GCCGCTGTCTTTGAGGTCTG	20	0.000753
XRCC5	GACTTGGGCTTTACCCGGAC	20	0.000765502
PSMD6	GAGGAGTCGGCGAATACGCC	20	0.000827268
NIP7	GCGCCCCTTGTGGTCCGGAA	20	0.000846954
NPAT	GCCAGTCTCAACTCGTAAGC	20	0.000885199
SF3B2	GAGATCGGAGCTCCGATCCA	20	0.000931406
CCT6A	GAAAAGTCGGCCCGTCTGGC	20	0.000984824
DYNLRB1	GCCTTTCTGCGCCTGCGCAA	20	0.001059
PDCD11	GTTGAGCCCGCCCACACTTC	20	0.00106922
CTNNBL1	GACCGCGTTCTCACCTGGGC	20	0.00108122
MCM2	GTAGGCGGGACCGGACCCTC	20	0.00116294
ATF5	GGCAGGAAATTCTGCAAGCA	20	0.00133997
NCBP2	GTGTCGTCATCAAGCTGCGC	20	0.00134649
MED27	GGCTTTTTTGCTTGCGAAGC	20	0.00136226
UBA1	GACCCTTAAGGGGTGCCGTT	20	0.00136464
MED18	GTAGTGTCTTCTCGAGAAGC	20	0.00138375
COPS6	GGTAACGGGCCGTGCGGGGG	20	0.0014202
EIF4G1	GCGGCGCAGATCGCCCGGCG	20	0.00145379
RPS13	GGGAGATGTAGTCACACAGA	20	0.00148049
RPL38	GACACCCTCCACGCGGACCT	20	0.00150971
DDX21	GAGGTGAAACGGAGGGACCT	20	0.00150982
CLSPN	GAGCCGGCGCGGCGAACGCC	20	0.00155132
PSMD7	GCGCCCTATAGCTGGGCCGG	20	0.00163561
VPS13D	GCTAGGGCTCCGCCTGGACA	20	0.0017289
MVD	GCGCCGAGCTTGTCACGCGA	20	0.00183421
NIFK	GGTTCGCAAGCGCATAACCC	20	0.00191962
EXOSC5	GTGACAACTGCAGCCGCACG	20	0.00192209
TUBGCP5	GAGTCGGTTGGACGCGCAGC	20	0.00195906
UBA1	GCTTCCCTAATCCCAACTTC	20	0.00204702
KIF23	GCGCATGCGGGACGGCTGGC	20	0.00206958
TRMT10C	GCCGACCAGAGCGGTCGCTG	20	0.0020816
VARS	GCTCCCGTCAGGCGCCGCCA	20	0.00210615
SARS	GCGTCTCTCGGATGAGGGCT	20	0.00215105
HAUS7	GGAGGCGCCTGGGCAGAGCG	20	0.00217896
GART	GCAACCCGGTGTTTAACACA	20	0.00218089
DDX24	GCAGCTCGGTTGGACGGCTT	20	0.0025343
DARS	GCCGCGGGAGATCATGGACG	20	0.00263926
RPL27	GGAATGCACCCGGCGCCGCC	20	0.00264847
NBAS	GACGATTCTCTATGACTTGT	20	0.00266971
SNRNP48	GGAGAGCGGCTGCCGGACGT	20	0.00271753
GFER	GCCGCCATGTTGCCCGCGCA	20	0.00274883
PSMC4	GGGACTTCCGTTGTCGTCAG	20	0.00278954
DMAP1	GTTTCTGCCGCGGCTTTGCG	20	0.00279578
RPL5	GCTAGCAATCTAACGCCATC	20	0.00288175
NDUFA1	GCACAAGAGAGACGGGCGCT	20	0.00291144
HAUS1	GTTGGCACCCGCCCCTCGCC	20	0.00297054
CLSPN	GTTTATGCACACGCCCCCCA	20	0.00302288
RPL14	GGCCGGCTGTGCAGCGGAAT	20	0.00303929
BUB3	GCCCTGCCAGTTGCGGACCC	20	0.00309794
RPLP2	GACTCCCTCCCCGTCGTCAT	20	0.00309891
NIP7	GGTCCCGGAACAGCGACGCC	20	0.00313165
MRPS18A	GAGACCAGCTGGTCGCTGCC	20	0.00317504
PABPN1	GCTCTCCAATCGCCGGGCGG	20	0.00318141
EEF1G	GACTGGCCCCACTCGGGCAA	20	0.0032412
RCL1	GCTTCGGGCCACGCCGCTAT	20	0.00326388
ESPL1	GGTTACATTTTGGATCCTCG	20	0.0033973
MFAP1	GTCCTCTACGTCGCAGAATT	20	0.00351081
TPX2	GCCACGCTTCTCTTGGCGAC	20	0.00351151
RPL21	GGTTGCCTTTCTTTCGCAAG	20	0.00352295
NOC3L	GTCTGGCCGGCATTCATTTA	20	0.0037908
SF3B2	GAGGGGCCTTTACGGGCCTG	20	0.00385969
GINS1	GGCGGGGCGGCTCCCCGTCA	20	0.00386195
EXOSC3	GGCGGTCCCCACAGCGCCGA	20	0.00392479
EIF5B	GAGCGGAGACCAAAGTCAGC	20	0.00392886
WDR36	GGTTCAGCGCGCTCAAGCGC	20	0.00409204
EIF2B3	GGGAGCGGTTGCGGCGTGCC	20	0.00411424
ECT2	GGATCTACTTCATATGTAGA	20	0.00415636
EXOSC5	GTTCGCAGGCAAAGTGCCGG	20	0.00419639
SMU1	GTGTTGCGCGACTGGCCTTG	20	0.00420061
EIF6	GCGGACTCTATGGTCGCGAG	20	0.0042816
DKC1	GTCTGCGCAATGCGATTTGC	20	0.00429308
WDR3	GTCTTGTGGGCGGGTCCAAT	20	0.00430682
NOL11	GAGAAAGCGCGAGGCCTGCC	20	0.00430896
RPS19BP1	GGATGGTAGTGGCTGCGGGC	20	0.00431446
WDR33	GACCTCGGGGCGGCTGTTCG	20	0.00440837
C9orf114	GTCCTCTCCGGAACCCCCTG	20	0.00451082
GPN2	GCCGCTCCGACCACGGCCTT	20	0.00453082
EIF2B3	GCGATGGCCGAGAAACTCGA	20	0.00470911
RPL9	GATTCGCATCTGGCGCCGCC	20	0.00472523
LSM5	GTTAGCCGCCATGGCTACGC	20	0.00474398
NUDC	GGTAACGGCCCGCGCGGCGT	20	0.00476736
CHAF1A	GTCGGTTCGGGCCCGCGCCG	20	0.00480726
POLA1	GTGGCATGATTGCCGGTGGT	20	0.00490941
GTPBP4	GACCGCTCTCCCACGGCTAC	20	0.00504974
EIF4E	GCAAGGGGTACAGTGCGCGC	20	0.00511675
DHX8	GCGCGCGTCCCCTTTGTTTA	20	0.00512539
CENPA	GCACCCTCTGCGGCGTGTCA	20	0.00522456
RFC5	GCGCGCGAACTGTAAGTGCC	20	0.00532358
PSMC2	GGACTGGAGCGGAGCTGCCT	20	0.00535821
NMD3	GTCCCTTTTAATACGTCACT	20	0.00539448
CTNNBL1	GCATGAGAAGTTAGAGGGCC	20	0.00549415
SNRPG	GACGCCAGACGCAAGACGCC	20	0.00553595
RPLP2	GTAGGCGCCGCGTGGCATGC	20	0.00553756
SKIV2L	GCGACTACTTGCCGCACTTC	20	0.00555588
EIF3A	GTAGCTGATCGGGGCGCGCC	20	0.00555825
AARS	GCCACGCGGGGCCTGATCCT	20	0.00564282
PNISR	GGCGCCCGATTTGTCTCACC	20	0.00565111
DNA2	GCTGATGGAGAAGAGTTTTT	20	0.00577407
SPC24	GAGGGTCGGAGCGTGGTCGC	20	0.00577845
RPS13	GCCTCCTGCGTGAGAGGAAG	20	0.00582222
EEF1G	GAGGAGTTCTGAGGTTGAGT	20	0.00585416
CD3EAP	GCGACCCATCGGGACCCGAC	20	0.00587806
CCT3	GCGGGACTAAGGCTGTCAAT	20	0.00591064
TP53I11	GCGGTGAGCTCCGAGCCGTT	20	0.00594907
BCCIP	GGCTGTGTAAAAATAGTGTA	20	0.00598072
MED7	gcttagaaaaacagcggcgc	20	0.00599027
SNRNP200	GCGTCTTTCCTGCGTCGTTC	20	0.00601966
ARCN1	GTGCTTTTGCTCCGGGCTCG	20	0.00607335
AAMP	GCCTACGCCTACTTCCTGCC	20	0.00616713
RPL36	ggtgaccctgcctgtaggag	20	0.00619408
XRCC5	GAAACagacagggtgtcgct	20	0.00620279
POLR2B	GGAGCTTCCGGggtcgggcg	20	0.00624824
DCTN3	GAGCGCTGGGTGTAcgggcc	20	0.00634534
HAUS7	GTTTCATCATTGCAAGTCCC	20	0.00639279
PRPF4	GAGAGAGGCTCCAAGCAGTC	20	0.00644121
IMMT	GGTTACTAGGTGAACACTGC	20	0.00646692
GTPBP4	GTGGGACTTCCACTGTCGGG	20	0.00648001
DSN1	GAGATTAGTGCGGCGGCGGG	20	0.00653412
POLR2H	GCCTGAGCTCCGTAGGGGTT	20	0.00662614
WDR75	GCGCTTTGTCGGCTGAGGGG	20	0.00693132
EIF4G1	GTGGCTGTCACGTGACGGGG	20	0.00694985
ATP6V1B2	GATGGCGCTGCGGGCGATGC	20	0.00699759
FARSA	GGGCGCCGTGAAGAGCCTTC	20	0.00703232
UBA1	GCCAGAGTTTGCGCGGAGCT	20	0.00706385
SNRNP48	GGAGGAGGTGACCGCGTCCC	20	0.00711427
DNTTIP2	GCAGTTCTCTGACGCATTTC	20	0.00713492
MPHOSPH6	GCTGAGAGCGCCACTCCGGG	20	0.00719425
CHMP2A	GGGCCGGTGCACTGGTGTTT	20	0.00731999
MCM2	GTGTCCCTTCTGGTCGCCAG	20	0.0073477
ATP6V1A	GTGGTCGTTCCCGCTACTTG	20	0.0074459
NAT10	GGCCGGTCCCCTCTCGACCC	20	0.00745462
CWC22	GGGGTGGCGGGTCGCCGGAT	20	0.00761306
MRPL24	GTGAGGGCCGCCCGCCCTAG	20	0.00765427
FTSJ3	GCGTGATCTGAGTGGAGAGC	20	0.00766889
CDC5L	GCGCAGATCTTCAAAGCAGA	20	0.00769139
RPL28	GGGTTCCGAAAATACCCGAG	20	0.00769588
MCM6	GAACCTGGGGGTCGCGCGTC	20	0.00778619
SEC61A1	GGCCGGTCAGGGTTGGCCGG	20	0.00790385
RPS18	GGCTCCATACAGAAAGTCGC	20	0.00793176
SNRPG	GGCTCAAGACATTCGGCTAA	20	0.00795478
NPAT	GGTGATTCTTCGTCATTCGG	20	0.00804711
SMN1	GTTCCGGCGCGGCACAGGCC	20	0.00810774
SPCS3	GCGAGACGTGCAGCCGCACC	20	0.00819129
BDP1	GCTGATGGCGCAATCAGTTG	20	0.00819774
DMAP1	GCCGCGGCAGAAACTTCCGG	20	0.00822127
CSTF1	GCGTCAAGCTTGACGTCAAG	20	0.00823789
PHF5A	GACGTGGAGGCAGGAACAAT	20	0.0084615
MARS2	GTGAACGCGGCGCCGCACAT	20	0.00852565
NSRP1	GTAAACTCTCGCGCGGCTTT	20	0.00853681
UBA1	GGGGTGCCGTTTGGGGACTT	20	0.00855204
NAA25	GCTTGTCATCATGGCGACGC	20	0.00863632
CCT3	GCCGATCAATGAGATGGGTG	20	0.00867857
RPS13	GTCCCCGCTTCCTCTCACGC	20	0.00873423
SEC13	GCCGGAAGTGAGCTGTTCCG	20	0.00881782
RPL4	GTCTTTTTCTGGTGTGGAAC	20	0.00887908
TUBGCP3	GCAGAACGTTCGGCGACTTC	20	0.00892903
RPA2	GGAGCGCAGTACGCGTTTTC	20	0.00903197
MIS12	GCCGCATTTATTCTGCTCTC	20	0.00904914
IMMT	GCTGCAGGTCCTTATCCGGA	20	0.00906005
NOC3L	GATTTAAAAAATAAGTTTCT	20	0.00906874
SCFD1	GCCCGGAAGGGCGGGGCCAA	20	0.00913382
TTK	GATTGGTTCTTGTGCGACGG	20	0.00920387
RPS27A	GACGCTCCTTGGGCCTTCAA	20	0.00929036
MED17	GGCCACGCCTCTTATAGGCC	20	0.00933199
MRPS27	GCTGCCTCCATAGTGCGGCG	20	0.00933368
TSEN2	GTTTGGTGTTTTGCAGCGAA	20	0.0095608
RPL11	GCTTCCGGCCGAGGGCCTTA	20	0.00979046
PRPF4	GTTTCGTTGGGGGGGAGCCG	20	0.00989362
NPAT	GTCCCGCCTCTTTCGCTTCA	20	0.00997385
CSE1L	GCGTGCACGGCCTACCAGAG	20	0.00997961
MIS12	GCGTTTGCTTTCGCTCGCCG	20	0.0102748
ZNF574	GAAGAAGGAGCTGCATTGGA	20	0.0103374
NUP160	GTGAATTCCCGAAAGTGCCT	20	0.0103739
LLGL2	gctactcaggaggccgaggc	20	0.010423
C14orf166	GATTGGTGGGCATTTGCCGG	20	0.010446
SNRPD1	GCAGTCGCGCTCCTCGCGGC	20	0.0105224
CARF	GGCCTTTTCGGGGTCCCACA	20	0.0106065
TAF8	GAACAAGATGGCCGACGCGG	20	0.0107812
CDC16	GGTTCATGGCGGCGCGGGCC	20	0.0110119
MRPS5	GCCTCCCCGTGCTGTGTAGC	20	0.0112907
RPS27A	GGTTTCCGGAGCGTGGGAAC	20	0.0115355
POP5	GAGGAAGGTGGACACTAGCG	20	0.0116067
SMN1	GTGCTGTTCCGGCGCGGCAC	20	0.0116628
PSMC4	GTCCGTACCCGCAGGCGCGA	20	0.0117608
NDUFAB1	GTGCTCGCGCAGGTGACTCG	20	0.0117958
SNRPD1	GGAGGGCTTGGCCCGGAGTC	20	0.0118069
RPL6	GCGATTCTTACCTTGCAAGA	20	0.0119319
EXOSC6	GGCCAAGGGCTCGGCCTACC	20	0.0119651
CASC5	GTATTCAAATCTAACCGCCT	20	0.0124499
RPS14	ggacacgttgtttctatgtt	20	0.0125315
XRCC6	GGGCGTGATTGAGGAATTTG	20	0.0127737
TTI1	GAGTCTGAGAGATCATGATC	20	0.0130633
XRCC6	GCCCCCATAGCCTTGCTAGA	20	0.0130756
EXOSC3	GCTCCACCAAACACCGTTTC	20	0.0132357
TUBGCP4	GCGGGGGAGTCCCGGAAGTT	20	0.0134016
CDC27	GAAGGTTATCATTACCTGGA	20	0.0134335
EIF2B4	GCCGGGCCTTGAGCGCCTTT	20	0.0134912
PSMC2	GTCTGAGCCCAATTTACTTC	20	0.0136067
TUBGCP3	GGACCACCGTGCACGGCTCC	20	0.0137564
EIF4G1	GCTCGGCGGCGCAGATCGCC	20	0.0141159
CPSF2	GCGAGACCATCTCCGGGGGG	20	0.0144015
C3orf17	GGACCCAGTCATCTGTATAT	20	0.0146475
PES1	GTCTCCACGAGACGGAGCCC	20	0.0147438
PSMC2	GTGCCCCTAGTAATTTAGTC	20	0.0149976
EIF4E	GGACGTCCCCACTTGTCCGC	20	0.0152384
ATP6V1C1	GCTCATGCTTCGGCCTGACC	20	0.0153173
MRPL24	GAAGAGCCTATCCTTTTCCC	20	0.0157068
UBA1	GGACGTTTTTTTACCAATGC	20	0.0157175
ACTR10	GCGCCGAGACTTGTTGGCCG	20	0.0158697
RPL10	ggtccctttgagaaaagctt	20	0.015921
RPL21	gcgcgccTTACAAGGGCCTG	20	0.016
ZCCHC9	GCAGCCGAGTTGGCGAGCCG	20	0.016395
CCT4	GCCGGGGGAACCTTTACGCG	20	0.0166016
NUDC	GCCGCGCGCGTGCGTGTTTC	20	0.0173901
CARF	GATAGCCCCACAAGGCGACA	20	0.0174524
GBF1	GGGACTAGGCCCCGCCATTT	20	0.0174815
RPL19	GTCGGTCTTGGGACCGCAGC	20	0.017639
MRPL34	GATGCTGGAATGCCCTGAGA	20	0.0178936
EIF3H	GTGAAGCAAGTGCAGATAGA	20	0.0179628
SCFD1	GTGGCTCGTGGGAGCCAAGA	20	0.0181533
MIS18BP1	GGCTCTTCAAATTTGAATTG	20	0.0182584
C3orf17	GCTCCCTTCCGGCCCGGACT	20	0.0183014
SAMM50	GCGAAGGCATCGCGAGCCAG	20	0.0185166
MCM2	GTCATGACGTCGCGTTCCGT	20	0.0185878
ACTL6A	GAGCGCGCCTTTTCGGCGTG	20	0.0190102
MRPL34	GAGTAGGTCGGCAGCGTTGC	20	0.0190588
TUBGCP5	GGCTTGGAAGTCGCCCGGCG	20	0.0191308
EIF2B3	GCGCGTTCCATCGAGTTTCT	20	0.0192139
POLR1D	GCCAGGAGAACAGGTGGCGC	20	0.0192725
RNF113A	GCAGATTCCGTCGCTTCTTC	20	0.0195299
RPS27A	GCAATCTACCAGACGCTCCT	20	0.0200994
METAP2	GCGACCTGGATCCAGACGAC	20	0.020276
VPS13D	gccgCCGCTAGGGCTCCGCC	20	0.020366
ORAOV1	GACCAGACAGGGCGGGGTGC	20	0.0207604
DNAJA3	GCGTCTTCCCTGACCTCTTG	20	0.0211374
SMU1	GGGGATGTTCGCGCCTTGCC	20	0.0221568
POLR2B	GCTTAAATCGCGAGAACTGA	20	0.0231222
RPL10	GTCTCTTGCGGTGCCGTTGC	20	0.0234474
EXOC4	GGCTCGACCTCCGCTTTGGA	20	0.0247626
DARS	GTGGGAGGAGACCCTGCGCG	20	0.0262179
PLRG1	GACATGTTTGTAGCTGATAA	20	0.0265771
CCT2	GGCTGCGTTTCCGGCCCGTG	20	0.0266567
CWC15	GGATTTTGCTTCCGGGTCGT	20	0.0267021
EXOSC3	GCGAGCACGCTCTAGCATTC	20	0.0269503
DYNC1I2	GGGTTCTTTGTTTTATCTAC	20	0.028877
CD3EAP	GTGCGAGCAGCCCGGGCTAC	20	0.0323355
INTS3	GATCCGGCCCCTAGGGGGTG	20	0.032731
SLMO2	GTTTCCTTGCGCCGCGCGCA	20	0.033313
GNPAT	GCGAAAGAACCGCCCCCAGC	20	0.039106
EIF2B4	GACCACGGCGGGCGGAGCCT	20	0.0415233
EEF2	GCCTCGCTGGTGCCCCGGAG	20	0.0454651
POLG2	GAAGTCGCACGCGGAGCTCGA	21	-0.0298376
HAUS1	GAGCGGGGCGCATCTCCCGCT	21	-0.0296917
PMPCB	GTCTGGCGAGATCTCGAGGAC	21	-0.0294408
MCM3	GACTTCCTGGACGACGAGGTG	21	-0.0294385
PDCD11	GGAGGAAACCTCATGGCTGTC	21	-0.0293865
CHMP2A	GGGGTTCTGATAGAGGAGGAC	21	-0.0293318
RPS29	GAAGCGTTGCCGTGGAGCGCT	21	-0.0292374
CWC15	GGAGCCTGCTGCATCGGACCT	21	-0.0291535
C1orf131	GTGTCGGAGAACTGGGAGGCG	21	-0.0286691
MRPL17	GCGCATCAGAGCCTGCCTCGT	21	-0.0286679
CDC27	GAAGGTTATCATTACCTGGAC	21	-0.0286552
CHMP2A	GAGACCTCGATGTTGACGACA	21	-0.0285872
RPL21	gcgcgccTTACAAGGGCCTGT	21	-0.0285086
RPL5	GACGGGCCCTAGGCTGGCATA	21	-0.0283357
TWISTNB	GCGTTTCCTGTTAAGGTAGCG	21	-0.028301
NUPL1	GGGTGGGGGTGAATCCGGCCC	21	-0.0282978
HMGCS1	GAGAGTCGCTGGGAGGCGGGA	21	-0.0282948
CENPT	GTTTTCCTCCGTATTTTTCAC	21	-0.0282012
COX11	GGAGGTGCCGAGAGAGGACTG	21	-0.0281372
MED11	GTGCGTGCGCAGCGAAAGGGC	21	-0.0281213
PSMA1	GCTCTCATACCTCGTGGCACC	21	-0.0280234
TTI1	GTCTTCAGGGTAAATCGCAGA	21	-0.0280118
SRRT	GCTCGGACGGGCTAGATTTCA	21	-0.027969
SRRT	GGGGGCGGGCGCGGAGAAACT	21	-0.0279226
SUPT5H	GGGAGGTCTAGCATGTGGCGT	21	-0.0278815
DNAJA3	GGCCCCTCTACCCGATATAGC	21	-0.0278437
POLD3	GCAAAGACGTTTCCCGCCGGC	21	-0.0278384
SMC1A	GTACAAGGGTCGACAGATTAT	21	-0.0273218
COPB1	GCCGCTGCTGCGGTTCATAGC	21	-0.0272777
TP53I11	GTCGGCCGCAGGAGCCCCGCT	21	-0.027154
NUBP1	GAGCGGGGGCCACTCCGGACA	21	-0.0271012
C1orf131	GCAGTCGCGGAACCCGGAAGC	21	-0.0270433
RPL3	GTCAACTTCTGAACGAAAGCT	21	-0.0268897
RPL30	GATTCACGTGGAGAGATGTCT	21	-0.0268081
EIF5B	GGTCTGTGAGAGACCGAATAG	21	-0.0267771
SMC2	GTAGACAGGCCTGGAGAAGCG	21	-0.0267679
PARS2	GGGAGGCGTGGGCTGGGATTG	21	-0.0266313
MED22	GCGGGAAAGTGCGGGTCGCAG	21	-0.0264737
RIOK2	GACCCGGGACGTGGCAGAAGC	21	-0.0262799
SKIV2L	GGGCCGTGGAGCTCGGATGCA	21	-0.0262468
SMN2	GTGGTGGCGGCGTCCCGGAGC	21	-0.0261375
ATF5	GAAAGAGAAATGAACTGGTGC	21	-0.0259979
CHMP3	GAAATGGGGGCCGGGCGGTAT	21	-0.0258271
RPL31	GACACGCAGTTCCCAGTTCTC	21	-0.0258257
MRPL34	GTGCGCACGCGCTTGCTCAGA	21	-0.0257697
VARS	GCCGTGTCCGACACTgccccg	21	-0.0257685
TONSL	GCGGCGATCCGAGCATGAGCC	21	-0.0255268
RABGGTB	GTGGAGTAGGGTTAAGCACAC	21	-0.025523
BDP1	GTCCTGTGAGCGCGGGGATGC	21	-0.0254512
MRPS33	GTAACCACCTTAAGAAAAATA	21	-0.0254483
CHMP6	gggcccgggcccTCACCAGGA	21	-0.0254417
SHFM1	GAATGCTGGGATACTGGAGGT	21	-0.0254321
EIF2B5	GTCTTCCCCGGGAGCCCACAG	21	-0.0253949
DLST	GGAGTCTGTTGGCGGGCAGAG	21	-0.025378
CSTF1	GGCCGTTGGCTCCACCACTTC	21	-0.0253289
ACTL6A	GATAGGAGGAGCCAGCAAGTG	21	-0.0253166
UMPS	GCCTGTTTGCTTCAAATTCCC	21	-0.0252531
NUP54	GACCTAGCCTAAGAGGCCGGA	21	-0.0251957
TRMT10C	GACTCCGACGTACGGACGCCC	21	-0.0250707
RPL14	GAGCGGCATGGTCGACGGCCC	21	-0.0250265
PSMC2	GAAGGACGACAAGCCCATCCG	21	-0.0250185
INTS9	GTTGGGCAGGGAATCGTCGCA	21	-0.0249321
PHB2	GCGATTCCTGTGCGCGAAGTT	21	-0.0249098
COPS6	GAGGCCTCAACGAACCCCTGA	21	-0.0247958
MCM2	GGCGACCAGAAGGGACACGGA	21	-0.02479
RPL23	GCCCCGCCCACCCTCCTCACG	21	-0.0245895
DDX21	GAAGAGGTAGTTCCCCACCCT	21	-0.0245733
EXOSC6	GGCCGTAGCCGCGTTGGGTCG	21	-0.0245185
CLSPN	GCTGACCCGAGGCGCCCGGGC	21	-0.024491
CTNNBL1	GGAGGTGAGATGAAAGGGCTC	21	-0.0243952
CDC26	GAAATGGCGTCGTGGCATTGA	21	-0.0243301
ADSL	GGAAGAGCGGAAGCGGAAACC	21	-0.0242441
BCAS2	GAACGTGATTACATCAGTGTC	21	-0.0242429
FARSA	GGCGGTCCGGCATCACGGGCC	21	-0.0242014
RPL27	GGTCGAAGGTCCGGGCGGCGC	21	-0.023959
PHF5A	GTTTCCCGCCTCTCAGGCGCG	21	-0.0239494
ATP1A1	GGCCCCGGCGGAGCGCCCCAG	21	-0.02385
PSMC1	GTGGACATGAGCGCGGTCTCT	21	-0.0236591
RPS14	GCGGCTGGCCCACCTGGATCC	21	-0.02348
NRDE2	GGGGCTTAGTGAGGCTCCCGA	21	-0.0234461
FTSJ3	GCGGCGCTGACACAGCAGATC	21	-0.0232556
EIF4E	GGAGGTCAGGTCCAACATGAA	21	-0.0231541
DONSON	GAGGCGGCAGCTCCACGGCTC	21	-0.0230649
GEMIN5	GTAGTTATGGGGCAGGAGCCG	21	-0.0230249
PSMC1	GGTGGACATGAGCGCGGTCTC	21	-0.022904
UBA1	GAGAAGGAGGAGGGTGGCGGC	21	-0.022861
RPS27A	GCACCGGGTTGGATTGTCGCT	21	-0.022805
TREX2	GAGCTCTTCACAGGCACGGGG	21	-0.0225822
RPL27A	GCGCACCTCCACAGTTCTTAG	21	-0.0225117
SUPT6H	GCGAGAAACACGCTCTCCAGT	21	-0.0222954
FBL	GCCAGGCCAGAATCGGAGGGG	21	-0.0221546
EXOSC6	GATTCTTCAGGGCCGCGGATG	21	-0.022152
MINOS1	GTCAGGCCTCTCGGCCTTTTc	21	-0.0221463
UBA1	GGCTTCGGCTCCTTGAGGAGT	21	-0.0220155
ARCN1	GAGGCTCGGACCCCAGGAGTT	21	-0.0219361
IMPDH2	GTGCCGCCCCTCTCTTCGCCC	21	-0.0219248
RPS27A	GCTCCTTGGGCCTTCAAGGGA	21	-0.0219155
INTS9	GCGATGCTCTCGGCTGGCAGG	21	-0.0218735
CAD	GGTCCTGCGGGGCCAGCCCTT	21	-0.0218435
PHB	GTGGATCTTGGAAAGCGGGCG	21	-0.021758
GNL2	GTGAAGCCCAAGTACAAAGGA	21	-0.0217518
IMMT	GCCCGCAGCATCTCGGTCAAG	21	-0.0217509
TTI1	GCAGGATGTTTCCTCAATGAG	21	-0.0217466
RRS1	GGGCATCCCGGCATCTGCACG	21	-0.0216311
RBMX	GACAGCAAACTTTATACTGCC	21	-0.0215776
CENPT	GAGTTACATTAACTGTGGCGG	21	-0.0215145
DLST	GACAACAACCGGAAGTGGGGC	21	-0.0215049
GPN2	GAGGGCGGGACTTCCTCTCGT	21	-0.0214631
RRS1	GGTGCGCCGGACCCACGCCGG	21	-0.0214182
SSBP1	GAGAACTGGAAGGAAATCACG	21	-0.0213591
CDC27	GCCTATCTTTAGTCAGTTCGG	21	-0.0213384
SLMO2	GCACGTCTTTGAGTAAGTTTG	21	-0.0211883
MED30	GATGGCGCCCGGGCCCTTCGC	21	-0.0211266
EIF4G2	GACTCCTCTGAGCTGAGTTTG	21	-0.0210656
EIF2B4	GCAGCCATCGCCCTCAGTCCT	21	-0.0210198
EXOSC3	GGTCGCTCCACTGCACCCCCA	21	-0.0209194
RPS23	GGATGGGTGAGCTGTTGTGGC	21	-0.0208376
NVL	GGGTGCCACTCCCCTTTTGTC	21	-0.0208209
ZNF574	GTGTGGTAGAGGGGGTGGCTC	21	-0.0206806
REXO2	GCCATGGCTGCGCCACCTTCG	21	-0.0206655
GNPAT	GAACTGGAAGACTCCATGGTG	21	-0.0205634
MPHOSPH6	GGCGCTGGGCGGAAGCTACCA	21	-0.0205429
DHX15	GGTCCTGGCAGGGAGCGGGCC	21	-0.0204408
RBMX2	GAATCGACTGGCCACTGGCGC	21	-0.0204253
NUDT21	GCCGGTCTGCGAGCGATTGGG	21	-0.020297
MRPS9	GGCGCAGGCGCTAATGGCGCG	21	-0.0202873
TP53I11	GTCTGGCCCGACCTTCTGGGG	21	-0.0201633
RUVBL1	GCCACGTGAAAGGGCTGGGGC	21	-0.0201318
MRPS18A	GATAAGGCACCAGGGTGTGGA	21	-0.0201255
CSE1L	GCAAGGTCTTCGGCTTCCCTA	21	-0.0200341
EIF4G1	GGCAAGTGAGGGTcggcccgg	21	-0.0200274
RPS5	GGACACAAGGACAAACACGAA	21	-0.019984
PHB	GTGCGTGAGTCCGACTTGTGA	21	-0.0199466
WDR3	GGGTTCCACACACCGAACACA	21	-0.0198136
NSRP1	GTCGTCACGTAAACTCTCGCG	21	-0.0197963
NMD3	GTGCGGTCGCGCCCCGGGGTT	21	-0.0197696
NIP7	GTGACGTTGTTGCTGGGAAGA	21	-0.0196886
MCM3	GTGCTGGACGATGTGGAGCTG	21	-0.0196807
NOP2	GGGGAGAAGGGTGCGCTACCT	21	-0.0196755
CHMP2A	GGAGGGGCTCGGGCCAGCACT	21	-0.0196236
DHX16	GCTGCCCGACGCTTCAGGGCC	21	-0.0195964
MIS18A	GCGGCTGTGAGTGCGGCGACA	21	-0.0195828
RBMX2	GTCACCGAATCGACTGGCCAC	21	-0.0195014
PMPCB	GCCTCCTCGACCCGGACCCGC	21	-0.0194214
EBNA1BP2	GTAGGTGTCAGCCGAGCTCGT	21	-0.0193844
MIS12	GCTCAACTCGCCGAGATGACC	21	-0.0193609
RPL23	GGTTTTTGCTCCGGCCACGTG	21	-0.0193429
TIMELESS	GTTCCCGGGTCTCACCGGACG	21	-0.0192505
MVD	GTACAGCGCCGGTCAACATCG	21	-0.0192138
HAUS7	GCTACCACCCTAGAGCGTGGC	21	-0.0190843
NOL8	GGCTGCAGCGGCGCTGGCTTT	21	-0.0190578
INCENP	GTCCCTGTCGACTCCGGACCA	21	-0.0189832
RPL36	GGCTGAAGGAGCCGGGACGCG	21	-0.0189742
SRSF1	GAGCTGATAAAGGCGCCATTT	21	-0.0189342
PARS2	gtgtgactctcacgacgaccg	21	-0.0188307
MRPS35	GTTCAGTGTCAGGGGCGGGCC	21	-0.0188169
RPA1	GGCCAATAACTGCGCAGCGCG	21	-0.0188108
CWC15	GAAGCGCTTGGATTTTGCTTC	21	-0.0187434
RPS13	GGTCACTTCCTGCGTGTTGGG	21	-0.0186833
NUBP1	GGGCAGAGGGGCTTCATGTCA	21	-0.0186777
HAUS5	GAGGGGTGGAGTTCTCACTCC	21	-0.018579
PNPT1	GCGAGCACTATGGAGTAGCGC	21	-0.0185218
TUBGCP3	GTGCACGGCTCCGGGCGAGGA	21	-0.0185185
TXN	GGAGCCTGCGAGCCGGGATCG	21	-0.0184242
FIP1L1	GGTGGATGCGCATGGTGGGCG	21	-0.0180803
MED17	GCTTCCGGTGAATCACGGTGC	21	-0.0179818
RPL31	GCTTAGGGGAGCCGGAGCGGC	21	-0.0179656
PSMD7	GGGCTGACGAACCGGAAGAAG	21	-0.0179487
RPAP1	GCGGCGGAAACGCGATCTCTG	21	-0.017932
SUPT5H	GAAGTCTCTGACCTCTTGGGC	21	-0.0178522
RPL4	GTATCCGTGTTGGTTCTTAGG	21	-0.0177938
TSEN2	GCCGGCGTTTCCAAGAACCAA	21	-0.0177367
UTP3	GATCTCGACTAAGGGACCGAG	21	-0.0176698
ATP1A1	GAGGCTGCCCCCGCCGGAACC	21	-0.0175785
RPL36	GGGACGCGGGGCTCTGGGCCT	21	-0.017497
RPL19	GTCGGTCTTGGGACCGCAGCT	21	-0.0174967
RPL31	GCCAGCCCGGGGCTCCGGTTG	21	-0.0174814
POLD3	GCGGGCGTGCGACCGGGGTCC	21	-0.0173865
CCT3	GCGCACGACGAAGGCACTGGG	21	-0.0173502
PMPCB	GATCCGAACAGTGGGTCGGGC	21	-0.0173479
FCF1	GACTGTTATGCTTTACAGAGT	21	-0.0172708
PSMA5	GAACCCGAGACTGGCCGGACC	21	-0.0172595
CENPA	GGGCGTTCCAGAGTCAGCCAC	21	-0.0170632
EIF6	GTTACTGGTTACTTGGTAAGC	21	-0.0170181
PRPF4	GTGAGTCGACTCGCGCGGCTC	21	-0.0170138
DUT	GCGGGCCCGGCCTGCGGAGGT	21	-0.0169065
CENPT	GCAGGCCGGGCCAGGCTAGAC	21	-0.0168628
NOP58	GAACGCGCTACTCCTTCTCTG	21	-0.0168609
GNPAT	GGCGCCCGGGATCCTGTGTAG	21	-0.0168577
RRN3	GCCAATCAGCGGCCCCGCGTG	21	-0.0168216
NLE1	GGAGACGGCGCTCTGTCTGCC	21	-0.0167673
BDP1	GTAGTTCCTAATCCCCTTTCC	21	-0.0167428
COX11	GACGAGAGGTCAAATCTCGCG	21	-0.0165003
SRFBP1	GTGAACCGGTCTCTCAGACCG	21	-0.0164147
TSEN2	GAAACGCCGGCGCCTTGTTCA	21	-0.0163966
CENPT	GTGCTCGGGCTGGGTATGTGA	21	-0.0163151
CCT4	GCTGGCGAGATTGTACGCCCG	21	-0.0163052
VPS35	GGGATTAAGACCAGCCCGATT	21	-0.0161958
RPS14	GAGAGACGGGGGTCTTTCCGT	21	-0.0161567
BCCIP	GCTTCCCCTTGCCTGACCTTC	21	-0.0161102
PABPN1	GCTCTCCAATCGCCGGGCGGC	21	-0.0160604
FIP1L1	GGCGCGAGAGGCCAGGGACGC	21	-0.0160511
CDC20	GCCCTGATTTTGTGGCCGGCC	21	-0.0160158
VPS13D	GTGGCGGGCTTGGGGCCCGGG	21	-0.0160126
SARS	GCTGACCCGCCCTTCCTGCGC	21	-0.016002
BCCIP	GCTTGCCAAAAAGTTTTTCTC	21	-0.0159848
ZNHIT6	GGAGGGAGTAAGGGACTTAGC	21	-0.0159558
IARS2	GGGGGCTGCGCCCTcgcgggc	21	-0.0158638
RPS19BP1	GCCGAGACGACAGGGACTGCC	21	-0.0158467
SNRPB	GGGAGAGAGGCTAGGCCTCTG	21	-0.0158248
NPAT	GCTGCCGTGAAGCGAAAGAGG	21	-0.0158213
SDAD1	GGTATGACCGGAAATAGCGCA	21	-0.0158152
RPL28	GCCAATGACCCTTGAGGCGCA	21	-0.0158114
KIF23	GCCCGTTTGAAATGCGCCAGG	21	-0.0158061
UTP3	GTACGATTGAGGACTTCCGCT	21	-0.015794
RPL21	GCCGGGTCGGGTCTGGGCCGT	21	-0.0157733
EIF4G2	GTGTACAGGACTAGCACTTGC	21	-0.0156925
AQR	GGGTTCCCTACGGGACTCTGA	21	-0.0156153
PLRG1	GGCTAATTATTCAATAATGAG	21	-0.0155739
MED18	GGGGAAGTTATTTTAAGATGA	21	-0.0155718
TIMELESS	GCCTCGCTCTTCGCGCAGGCG	21	-0.0155497
C1orf131	GAACCTTTAGCCTCAAAGCAG	21	-0.0155086
RRM2	GGGTCCGTGATGGGCGCGAGC	21	-0.0154622
LTV1	GTGGTGACGTTGGCCCATTTC	21	-0.0154123
EIF3G	GTGCCGCCGTCGCCGCCTAGA	21	-0.0154014
ASCC3	GTGATGGGAAACGCGTGAGCC	21	-0.0153823
INTS8	GCCCCCGCCGCCGCTACCACC	21	-0.0153297
DHX15	GCGGGGACCGATGGGTAAGCC	21	-0.0153141
DUT	GGCGGGGCTGGCGGGAAATTT	21	-0.0152107
SLC25A27	GCTACTGCTGAATGTCCGTCC	21	-0.0151333
RPLP1	GCAGCCTCTTATGTGTCCACG	21	-0.0150586
BUB3	GTAGTGGAAACGTTGCTTCTG	21	-0.0150301
EXOSC5	GAACCTGCTGTCGCGGCCAGA	21	-0.0149463
LLGL2	GTCCGCGTCGCTGTGCTGGCC	21	-0.0148587
EIF4G2	GCGAGGCCCGGGTCGCTCGAC	21	-0.0147302
DHX8	GAGTTTGGCAAGTTCTTCCGC	21	-0.0147019
CENPT	GGCTGGGCGGTTAGGAGGGCC	21	-0.0146663
SNRPD1	GGGCCGCAGTCGCGCTCCTCG	21	-0.014614
PHF5A	GCGCCCTACCCCTGGCTGTCT	21	-0.0146094
RPS15A	GGCTGGTCCCCACCTTGGCCG	21	-0.0145915
EIF2B3	GCCATCGCGCGCCTGCGCCAT	21	-0.0145742
CCT4	GGGCTGGCGAGATTGTACGCC	21	-0.0145473
NUP160	GGAAGCCTCGCAACGAAGGGC	21	-0.0144176
SUPT5H	GCGCTTCCGGCAGGCTCGTTT	21	-0.0144076
WDR75	GCACCGCGCTTTGTCGGCTGA	21	-0.0143976
XRCC5	GGAAGCGAGTTGCGACACGGC	21	-0.0143736
RPL27A	GGGCGAGAACTGTTGAAGAAT	21	-0.0143574
UBA3	GTCAGCATCGCGCTACACACT	21	-0.0143425
MARS2	GCACATCACAAGCATCATCGC	21	-0.0142538
RPL4	GTATCTCGGGGCCAGTAAGGA	21	-0.0141503
KIF23	GGTCCTGCCTCTCCCTGCGGA	21	-0.0140646
SKIV2L	GGCCCGAAGGGGTAGGTCCAG	21	-0.0140617
MIS12	GTGCCCGAAGAGAGGTCCTAA	21	-0.0140138
WDR36	GAACTTTATGTGTTGCACTGA	21	-0.013938
EIF2B2	GCTTCGTGGAGACCCTGAAGC	21	-0.013898
MYBL2	GGAGGGTCGGGGGTATCTGGG	21	-0.0138658
SSBP1	GGAAGTGATCCCCTGCGTGGC	21	-0.0138295
PSMD1	GCCCCTGGGCGGGCGGGGTCC	21	-0.0138263
TONSL	GGCCGCGCTGTGCCACCAGCT	21	-0.0138005
KCTD10	GACTTTTCATGGTAGGGAGGG	21	-0.0137911
VARS	GCTGTTCCTCGTGAGAccggc	21	-0.0137649
CDC23	GTATTATCGCCGATGATTGGC	21	-0.0137567
DCTN3	GTTATTTCAAAGGCCGGGCTG	21	-0.0137279
RPL4	GGTTCTTAGGCGGGGCAAGGT	21	-0.0137246
PSMD4	GGCCAAGCCGAGGTCTGTGAT	21	-0.0136999
NUDC	GACGACTAGAGTCGTTGGGCC	21	-0.013673
FIP1L1	GAAGCGGCGGCGCGAGAGGCC	21	-0.0136637
EXOSC5	GCGACAGCAGGTTCTGTTCGC	21	-0.0136108
CDCA8	GGACCACCCGAAGAAGTCGCC	21	-0.0136045
EBNA1BP2	GAAGGCAGGCAGCAGCGGCCA	21	-0.013589
FIP1L1	GCCCCGAGCGCAACTTAAACG	21	-0.0135801
POLR2B	GCAATATGTACGACGCGGATG	21	-0.013568
CHAF1B	GCTCTTTTGGTCGCGTCGGTC	21	-0.0135337
EXOSC3	GCGGAAGGCGGGTACCGGAAA	21	-0.0135293
RPL15	GGGGTGGAGAGGCGGCCCCCG	21	-0.0134822
XRCC5	GCTTTACCCGGACTGGGGATC	21	-0.0134738
EFTUD2	GAAAGGCGACAGCGGCGTCTG	21	-0.0134582
RPL34	GAAGTTCCTTACTTTGATCTT	21	-0.0134256
TBCD	GCGACCTCCGACCCCACTCGC	21	-0.0134118
IMMT	GCTGCAGGTCCTTATCCGGAA	21	-0.0133755
MIS18A	GTTTTTTTTCCCATGGCGCTC	21	-0.0133392
ZNF574	GTAGAGGGGGTGGCTCGGGGG	21	-0.0133105
GNE	GGTGAGAGCCGCGCGGCGGCG	21	-0.0132996
GART	GTCTGACGCAGGCGCCATTAC	21	-0.013263
EIF4G1	gtgggggggccgggtcgggcc	21	-0.0132114
PSMC4	GATAGGACGAAGGGCTGGTCT	21	-0.0130501
PSMA3	GTTGGCAGTTCAGCCAATGAG	21	-0.0130146
CDC27	GCACCGTCATCCTCGAGGCTC	21	-0.0130085
INTS9	GAGGGGTAGCAATTATTGAGC	21	-0.0129284
VARS2	GGAGATCGCCGCGGCCCTGGC	21	-0.0129018
TREX2	GGCCTACGCCAAAGCACAGGA	21	-0.012859
CHMP2A	GTGTTCTCAGCTGCTCCCTTT	21	-0.0128189
CMAS	GCGCAACTCTCGCGGCGGCCA	21	-0.0128183
POP5	GCAGGTACCTGCTCTGCGAAC	21	-0.0128063
POLR2A	GGAGCTGAAAAATTTCCGGTA	21	-0.0127547
CCT6A	GGCGGCGCGCGGGCACGCTGG	21	-0.0127441
LLGL2	GCGGGCCCGGCTGGGCGAGTC	21	-0.0126888
SRBD1	GAGCGCTCAGAACTTTTTTAA	21	-0.0126231
MRPS2	GCGAAAGAAACCCCAGGGCCT	21	-0.0125937
ANAPC4	GCTCCTGCCGGCCTCTGACTG	21	-0.012584
DNAJA3	GGTCAGGGAAGACGCAAAGGC	21	-0.0125773
RPL7A	GAGAGCGGAATGCGTTGTTCC	21	-0.0125596
MED22	GGCGCTGGAGTTGCCTGGCCC	21	-0.0125323
CIRH1A	GTCTTACAAGGTGGCCGGCCC	21	-0.0124324
SRSF1	GGTGTGATTCGTGGCCCCGCA	21	-0.0124276
NUP160	GCGGCCCTGCCTTTGTTCCGT	21	-0.0123777
SMC2	GAACAGAACAACTCTCTAGCC	21	-0.012307
GNE	GCAACACAAACCCGCAGCTTT	21	-0.0122688
C9orf114	GCCCGCACTTACCGGGCCGCA	21	-0.0122415
GNPAT	GCGCTGTCGTGCTCCTCTACT	21	-0.0122043
XRCC5	GAAGCAGGAATCGTGGGATCG	21	-0.0121779
RPP30	GGAGGTAGAGACGGACTGCGC	21	-0.012173
ATP1A1	GGCGGGGGCAGCCTCCGGGTT	21	-0.0120924
IMMT	GTGCTTCCGGTGCGCCGGGCG	21	-0.0120592
DSN1	GTGTTTCAGGTACGGAGGTTC	21	-0.0120418
RCL1	GTCTTCCTGTTCCAAACCACG	21	-0.0120236
EIF4G2	GCTCGTGGAAAGACGCGCGAG	21	-0.0119823
RFC4	GAATACGCCGGTAGGAATACG	21	-0.0119796
SSBP1	GAAACACCTCCCGACCCACGC	21	-0.0119732
NUF2	GGCATCCGTCGCGGTTGGACG	21	-0.0119625
TTK	GCTACCTCCCAGGCAAAAATT	21	-0.0118778
WDR43	GAGGCCAAAGCGAAGTAGGCC	21	-0.0118267
NOP58	GGTGCTGTTTGAAACGTCTGT	21	-0.0118057
TAF8	GTCCCAAGGAGGGGGCGCCTA	21	-0.0118041
DCTN3	GCTGGGTGTAcgggccgggcg	21	-0.0118006
PSMC2	GACGACTAGTATATACATTTG	21	-0.0117993
MRPS18A	GCCGCTCTTCTTAATTTCAGG	21	-0.0117556
GNL2	GCGGGTGTCTTCGGCCGGGCT	21	-0.011743
NUP54	GATCCCCCTAGACCTTCACCC	21	-0.0117388
XRN2	GGAGTCCCGGCGTTCTTCCGC	21	-0.0116946
RPTOR	GCCTGAAGTCTCTTACGCTTT	21	-0.0116303
CLSPN	GGGAGCCGCAGTCCTCCCGCC	21	-0.0116262
RPLP2	GCCGCCCACCCCGCATCCCCA	21	-0.0115767
SRFBP1	GGACAGAAGAGGCTTCCGTTG	21	-0.0115766
RAD51	GTCGGGCGCGTGCCACGCCCG	21	-0.0115537
TRAPPC5	GCCCCTTCCCCGCGGGCGTGT	21	-0.0114908
NOP2	GTCTCGGCACCCTTCTGCTTC	21	-0.0114891
DDX23	GTCGCCATCTTTCCCGTTTCC	21	-0.0114864
VPS13D	GGGGGCCCCGTCGTCCGGCCT	21	-0.0114833
EIF2B3	GGGAGGCGGGCATGTCGAACT	21	-0.0114551
FBL	GGGGCCCGGGGGCGGGACTAC	21	-0.0114443
NUP54	GCTCCCCTTCTCAGTCCGGCC	21	-0.0114067
UBA1	GCGTCCGCCATCTTGTGTCGG	21	-0.0114027
HAUS1	GAATGGGGATCGTTGGCCTCC	21	-0.0113994
SNRPB	GGCTTCCTCCCCGATCAGTCG	21	-0.0113968
GTF2H4	GAAAGATGGTGAAAAAATGCG	21	-0.0113694
GTPBP4	GGTGCCGTCCGCCAAGGTAGG	21	-0.0113564
RTCB	GAGGGCGCAGTGGACGCCGGC	21	-0.011288
ATP5B	GGTGGCCGCTGCTCCGGCCTC	21	-0.0112876
CIT	GCCCACCTTCCTTGGGAGCCG	21	-0.0112698
GART	GGCGCCAAGTTCAGTTTCGAC	21	-0.0112506
EIF3F	GGGCGAGAAGGAGAACTTAGC	21	-0.011218
EBNA1BP2	GGATACCCCGTTTCTTCCTGT	21	-0.0110921
POLR1D	GCGGGGACAGCCCGGGGCGAG	21	-0.0110547
OGDH	GCCGGGTGTCGCGGCGCTTGG	21	-0.0110135
GNPAT	GCTGCCTTCCCGGGCGGGGTC	21	-0.0109704
MKI67IP	gcgaagcgctaaggcgaggcg	21	-0.0109571
NIFK	gcgaagcgctaaggcgaggcg	21	-0.0109571
RPS27A	GTGACTAGAGCAAATGTTAAG	21	-0.0109304
AQR	GTCACGAACTCCGCATTGATT	21	-0.0108991
MRPS33	ggttctctcatcgactacacg	21	-0.010822
SCFD1	GACCTCCACTCTCGGTAGAAC	21	-0.0107308
ATP5B	GAGGCCTACGCTGCAGTAGGC	21	-0.010715
EIF4G2	GCCATTTTAGAGCGCTCCACT	21	-0.0107076
EIF3G	GGAACGAAGATTAAGTCAGCC	21	-0.0107024
CIRH1A	GGGAAGCGGCTGCGAGAGCTG	21	-0.010699
CSTF1	GCTCGGAGCGGTAGATTGGGC	21	-0.0106293
RPL9	GCAAGCGCCATATGAGCCTGG	21	-0.010539
ARCN1	GGCCGGAGGAGCCCCGCCCTG	21	-0.0105132
CCDC157	GGCTGCGCGCTTCCCGCGCTA	21	-0.0104606
CLTC	GTGGAGGGGTACATAAGGCGG	21	-0.0104236
RPL15	GAGACCTATCTCCGAGGACGC	21	-0.0104229
EIF4G2	GCACTTGCAGGCGGAAGACCA	21	-0.0103962
NAT10	GGCGCAGGTACCCAACGCGGG	21	-0.0103482
TXN	GGCGGGGCTGGCGCAAGCGTG	21	-0.0103218
PSMC2	GTCGTCGATACTGGTTCATAC	21	-0.0103147
IARS2	GGTTGCCGGACCATGCGTTGG	21	-0.0103095
RPS27A	GGAATTTGCGTGGCCTGCTCC	21	-0.0102935
RRP12	GCTTAGTCAACATGGGTCGCT	21	-0.0102886
POLD3	GGGTCGTTTCCCCGGCAACGG	21	-0.0102543
MED22	GCGGGCGCTggggcgggtatg	21	-0.0102532
VPS13D	GGGAGAGCGATGCTAGGAGCC	21	-0.010243
CCT2	GTGACGCCACACGCCCTACTT	21	-0.0102165
TTC1	GTCTCCGTATTAAGATCTTGC	21	-0.010202
MIS12	GGATACTCTCGCGTTCCTGAT	21	-0.0101992
OXA1L	GGCGTCGGGTAAGGATGCCCC	21	-0.0101682
NUP54	GCGACATGGCCTTCAATTTTG	21	-0.0101016
RPL27A	GCGCAATCCCGCGAGACCAGG	21	-0.0100375
EIF3F	GCGCTGCTTTCTGGTTCCACC	21	-0.0100299
XRCC6	GGAGGCGGCACCTCGCGTTTG	21	-0.0100153
MRPS2	GTCCCGACCTTCCCGGCCCTT	21	-0.0100144
DERL2	GGAAACTGGGGTTTGGGCCTC	21	-0.00998815
EBNA1BP2	GACACAATCACGGTCACTCCC	21	-0.00996054
PNISR	GTGATGGAGAACAATTATACG	21	-0.00995486
TREX2	GCGGCACCTGATCTCCAGTGA	21	-0.00993623
CDC26	GGAGCGAGTCAAGGGCTTCCG	21	-0.00991323
PRPF4	GGAGCGAGTCAAGGGCTTCCG	21	-0.00991323
CPSF2	GAAAGGAGCGAGCCTCGGGCT	21	-0.00988045
RPS6	GCGAGTGTTAGACTGGGTTTG	21	-0.00986802
POLR2A	GGTAACGAATAAATAAGTAAC	21	-0.00983661
TANGO6	GGACGCATCTCCGCGCCGGGC	21	-0.00981505
RABGGTB	GCACACTGGTCACCTTAGGAT	21	-0.00976245
XRN2	GTGACGTCACGGCGCCGCCGC	21	-0.00972174
ACTR10	GAGAGGCCTTTACCAAGTGAG	21	-0.0097213
DERL2	GCTGGATATGACTGGGTCTTC	21	-0.0097213
EIF2B2	GGAAGCCGACCTCGCCCGCCC	21	-0.0097213
MRPL19	GTCCCACGGGGGACCAACGCT	21	-0.0097213
MRPL39	GCACCCGGTGGCGGGATCAAA	21	-0.0097213
MRPS33	GGCCTTCGGCACTGTAGCTTT	21	-0.0097213
NDUFAF5	GCAGGGCTCTGGCGCTTATGT	21	-0.0097213
NUP93	GCGGGGTTCCGAGCGTGGGGA	21	-0.0097213
RPL31	Gctctgggagcctttaaaagc	21	-0.0097213
RPLP2	GCGGCCCCGGGATGGGCCGGC	21	-0.0097213
RPS15A	GGTGGGGACCAGCCTCCTCGC	21	-0.0097213
SEH1L	GTCGGGCCCGCGCCTCCGAAG	21	-0.0097213
SEH1L	GCGGGGCCGACCCCGGAAGGA	21	-0.0097213
SLC25A27	GCCTCTCCTCCTCCTCCGGGA	21	-0.0097213
TRMT10C	GTGTTGGGGGTGGGAGGACGC	21	-0.0097213
TSR2	GTTGGTTGGGCTAGGTGCCTG	21	-0.0097213
NAA25	GGCCCTTTAATAGCCCTTTCC	21	-0.00968414
ACTL6A	GGACGAGAGAGCGCGCCTTTT	21	-0.00960533
RPL11	GGCTACTTCGCCCGCAGCCCG	21	-0.00959555
TANGO6	GAGAGGACGCATCTCCGCGCC	21	-0.0095906
NOP58	GCAGCGTGTTCTGATTCTTTG	21	-0.00956839
SCFD1	GCCACTGAATTAACCTGCACC	21	-0.00956068
NPAT	GGACGCGGGATGGAGGGTTAT	21	-0.00954468
SKIV2L	GATCTGGAGGGGGTAGCACTA	21	-0.00954355
RPLP2	GTCACTCTGAGGCGCCTCATG	21	-0.00950638
KCTD10	GCGGAAGTGGGGTGCGGACAG	21	-0.00949501
CIRH1A	GCGCGCTCTCAGGCTCTGCCC	21	-0.00948633
GPN3	GTTCCCAGTACACACACCCGC	21	-0.00947405
RPL27A	GCGGCTCAGGGCTGGCGCATT	21	-0.00944754
GART	GAAAGCCGTGTGTTAAACACC	21	-0.00942217
NEDD1	GCCGAAGTTTAACAGTCCAGG	21	-0.0094149
PRPF4	GAGCATGATGGAAGTCGTAGT	21	-0.00937999
XRN2	GCCGCGGCCTAGACGTGCCGG	21	-0.00934656
RPL10	gtggtgcaaggtccttcccag	21	-0.00932117
AARS	GCGCTCTGATTGGACGGAGCG	21	-0.00928328
GPN3	GACAGCAGAAATGAGTTGCGT	21	-0.0092778
HAUS7	GGGAGGGCCCCGCCCGAGGCC	21	-0.00923927
EIF3G	GGGGTGCTCTGGGAAGTATTA	21	-0.00920125
NRDE2	GGGGCTTGACCCCGAAGCGGG	21	-0.00917325
MRPL34	GCCGCTCCAGCCCTGGAACAA	21	-0.00914335
CENPT	GGGCCGTACCGTGCTGGTGGC	21	-0.00911653
TUBGCP5	GGAGCTCGTCCGGGGTGTCGC	21	-0.00910119
ARCN1	GAGTGCTTTTGCTCCGGGCTC	21	-0.00900446
TTI1	GCGTCACTTCCGGCGAGGCAG	21	-0.00899803
EIF4E	GTCAACATTATTTAAAAGCAT	21	-0.00897023
PSMD1	GAGCGAGCCGACGGGCGAGTG	21	-0.00888041
MFAP1	GTTTGGAATTAGTCAAGTTTC	21	-0.00888038
BCCIP	GTGAGCGGCAACATGGCGTCC	21	-0.00886424
NCBP2	GCGCGGAGGCGAGCATCTCAT	21	-0.00885048
WDR36	GGGACATTTCAAAACTGACAG	21	-0.00884073
POLR2G	GCGACCAGGCCAGGCGCTGGC	21	-0.00881422
ZNF574	GCGGTGGCATGGTGTGGTAGA	21	-0.00872726
IMMT	GACTCCGCGGCTCTTAGAGGG	21	-0.00872438
CD3EAP	GGCGGTGAGGGTGCGGGTTGA	21	-0.00868371
SGOL1	GTTCCAGGCGACGGCGGACGG	21	-0.00866736
RPL6	GACGCTTCATTTTTGTTGTTT	21	-0.00864744
SRFBP1	GGTTGCCAAACTCCAAGTTGC	21	-0.00863491
DLST	GAACACCCCTCGTCGGGCGGC	21	-0.00863359
CHMP6	GGACCCGAGCTACGGTGGCCG	21	-0.00861902
NCBP2	GAGTCGCTGCGCAGCGCCTTC	21	-0.00860853
WDR43	GGACGAACACGTGGCTGCAGC	21	-0.00855947
POLR1D	GGGCGGAGCGGGCCGCGCCCA	21	-0.00854189
MRPL34	GAGGAGGCCCGAGCCTGCGCC	21	-0.00853404
RPL11	GCTTCCGGCCGAGGGCCTTAT	21	-0.00852559
TUBGCP4	GGTGACATAACCAGGGACTCG	21	-0.00851212
GPN2	GGGCCGCGGGCCGCCAATGGC	21	-0.00847018
INTS4	GTGGTTCAGGTAAGCTCTGGC	21	-0.00842843
WDR36	GGAGTAGAACTAATTACTTGT	21	-0.00841073
MED22	GGGCCCCCTAGGTTCGGAGTC	21	-0.00839849
HAUS5	GCCCCGGAATCGACGCTGCGC	21	-0.00838518
MRPL34	GACAATGGGGGTGCACTGCTC	21	-0.00834836
MRPL34	GGCTCGGGCCTCCTCCTGCTG	21	-0.00831364
PRPF8	GTCTGGCCGCCATTGCGCTGC	21	-0.00828181
RNF113A	gccccgcggccgcccgcgagc	21	-0.00826624
WDR3	GCAACCGCGCCGAGTAGCTGA	21	-0.00821422
CDC5L	GTGTCTCGGCAAGCAGCCGAG	21	-0.00812781
TUBGCP5	GGAGTCGGTTGGACGCGCAGC	21	-0.00810817
CENPC	GGTTATTGCTTGGCCGCGGCC	21	-0.00807616
MCM6	GGCGGGCGGGGAGGCGCTTCC	21	-0.00803289
PSMD6	GTTCCCGGAGGTGTCCAGCAG	21	-0.00802986
EEF2	GAGCCCTTTCTCCGTTTCCGA	21	-0.00798062
LSM5	GGGAGCTGACATTCAGGATTG	21	-0.00794533
RPLP2	GTGAGTGTGGTGACCGGGCCC	21	-0.0079406
RPL15	GGCTCCGTGGGCGCAGTGGTG	21	-0.00787586
CIRH1A	GGAAGGGGAGCGTGGGGCCGC	21	-0.00785294
UTP15	GTGAGTCTCATGAGCGTGCTC	21	-0.00784629
MTPAP	GAAACACGTGGCCTGTGGAAA	21	-0.00784027
TCP1	GGGAGAGAAACAGGACTGTGA	21	-0.00781638
COPS6	GGGCCGTGCGGGGGTGGCTTC	21	-0.00781438
CSE1L	GGCCTACCAGAGTGGCTCTTG	21	-0.00780592
SMU1	GAAGTGACGTTAGGTGTCCGC	21	-0.00780492
EIF2B5	GCAGTGCGCATGCGTCTTCCC	21	-0.00774602
EFR3A	GTGCCTACGATTACTGGATTT	21	-0.00773263
BCCIP	GTTTCTCCTCACAGACCCTCA	21	-0.0077032
HJURP	GCCTTCCTCTCGGTTTTCTAT	21	-0.00768579
DUT	GGGAGGCGGGATTCACATTTT	21	-0.00768257
EFTUD2	ggaaggggccttatatgctat	21	-0.00768006
DYNC1H1	GCGCGACACCATGTCGGAGCC	21	-0.00766327
TTC1	GTCGCTATTGGCAAAGCATCC	21	-0.00755743
RPL15	GGGAGGCTGGGGAAGCGTCGG	21	-0.0075566
RPL21	GGGGAGCAGCGTGCGCCGGGT	21	-0.00755567
PDCD11	GCCGGCTTCGAAGCGGGGCTA	21	-0.00752221
RACGAP1	GCCTCTCCACTCGGGCTTTTC	21	-0.00750618
C9orf114	GCGAGTCTCATTGGCAGAGGC	21	-0.00747875
NIFK	GTGGTTAGCGTCGGCGGCTTT	21	-0.0074652
MKI67IP	GTCCTGCCTCTACTTCCGCCT	21	-0.00745759
NIFK	GTCCTGCCTCTACTTCCGCCT	21	-0.00745759
MED10	GGTTGAGCCCGGCCTGGCTGC	21	-0.0074557
CCT3	GTCTGGCCGTTCTTGCGTAGG	21	-0.0074368
GART	GTTTCGACAGGGATATGCATC	21	-0.00743521
TSEN2	GAAAGGGCCTAGGTACTGTGC	21	-0.00742979
EIF2B4	GTACGCGGAGCCGACGAGCTC	21	-0.00740732
CWC15	GAAGCAACGACCAATCCGCAG	21	-0.00740244
MRPS2	GACCCCGCCAGCCGGGTGACG	21	-0.00740011
C1orf131	GCTCCAGAACCTTTACGACTT	21	-0.0073838
SNRPB	GGTCGGGTAGAAACCTACTTC	21	-0.00738304
CASC5	GATGGCCGCTCCCACGATTGT	21	-0.0073745
WDR43	GCGAAGTAGGCCTGGCTGTGC	21	-0.00731341
ZMAT2	GAACTCCCCAGTAATAGGCCT	21	-0.00731033
CDCA8	GCAAGAAACTGGGTAGGGACG	21	-0.00728812
PSMC4	GACAACGGAAGTCCCTGGCTG	21	-0.00727848
DDX56	GACTTCGTCTCCGAAGCCGAT	21	-0.00724369
RPL7A	GGAGGAGCAGGAGGCCCTCCG	21	-0.00719468
SEH1L	GCAGCATCGCGGCGGACCACA	21	-0.00718717
ZNF574	GAGCGGCACCAACGGCCGACC	21	-0.00715844
SRRT	GGGCTAGATTTCAGGGCGACC	21	-0.0071475
CCDC174	GATCCGGTTCAGTTTTCTTAC	21	-0.00714649
ZNF574	GATGAGAAGAAGGAGCTGCAT	21	-0.00711234
PWP2	GGTGGTGCGCGACCCCGTCCC	21	-0.00709397
MED10	GTGTGGGTCGGGGACGGGCCG	21	-0.0070476
DSN1	GTTCCGGACTGGACGGGCGTC	21	-0.0070209
IMMT	GGCTCCCCCGTTTTTCGCTGA	21	-0.00698735
UBA1	GGCCCTGAGCCACGCTGCTGT	21	-0.00697834
BIRC5	GGAGTAGAGGCGGGGCGGCGC	21	-0.00691814
DSN1	GTACGGAGGTTCCGGACTGGA	21	-0.00687837
DKC1	GTGCTAACTCCGGGCGACTCG	21	-0.00685734
LDB1	GGCCCCTCTGCTGGGGGCACC	21	-0.00685335
RPL32	GTATTGTTATTGTCAGCTTAC	21	-0.00681677
ZNF574	GCCAGGTCGCCTGCGCACTGA	21	-0.0067975
XRCC6	GAGGAATTTGGGGAGGTTTTT	21	-0.00675946
POLR1E	GCGCTGTGGGCGGTGCCCGGC	21	-0.00675458
OGDH	GGTAGGAGGGACGGGACCTGA	21	-0.00667663
RPL10	gaaagggaggctaggttcccc	21	-0.00665494
RPS14	GATAGAGagtgtctcagccta	21	-0.00665365
RPLP2	GGTGGGCGGCGGGGTATTTTT	21	-0.00664117
CHAF1A	GGTCGGTTCGGGCCCGCGCCG	21	-0.00660573
PRPF18	GGGAAACTGGAGCTTAAATTC	21	-0.00660556
DDX21	GGTTGAGAAGACCGGTCGGCC	21	-0.00660042
RPS15A	GATCCTGGCCTTGCCGGTTCC	21	-0.00656794
PES1	GCATGGGGTCGACTCTTTTCC	21	-0.00653945
TUBG1	GAACCTGGCTAGCTGAGGGGC	21	-0.00652619
CDC26	GAGAGAGGCTCCAAGCAGTCT	21	-0.00650615
POLR2G	GCAGCAGGATTTCGTGCTCTA	21	-0.00643386
WDR36	GCTGTCAAAAGCAGACAGTAG	21	-0.0064304
TTI1	GCAGCAGCCTTCCCCTCATTG	21	-0.00639446
TREX2	GGAGACTGAGGCCTGGCAAAG	21	-0.00639104
PRPF4	GGATCCCAGCTCACTCTGGCA	21	-0.00638501
TRAPPC5	GCCCCCATCGCAGCCCGGTGG	21	-0.00637383
ATP1A1	GCCGCGGCGGGAACGGAGGCC	21	-0.0063292
DONSON	GGCTCCGTCAGCTCACGGGGC	21	-0.00631123
POLR1D	GCCACCCGCTCCCCTTGGGCG	21	-0.00627424
POLR2A	GTAACGAATAAATAAGTAACC	21	-0.00627154
CLSPN	GTTTATGCACACGCCCCCCAC	21	-0.0062476
SF3B2	GGTGAGGAACACAGGAAGTCG	21	-0.00622614
EXOSC2	GGATACAATCACTACGGACAC	21	-0.00622423
CASC5	GTCTTAGAAATAGGGTTGGTC	21	-0.00620073
MCM2	GGGCTCTGGGCGGAGCGCCTC	21	-0.00619805
DKC1	GCAGACGACCAGCGGGCGCCT	21	-0.00617879
MTOR	GGCGGACGTACCGCGGGCCGA	21	-0.00608569
MED22	GAGGGATGTTAAGCGAGGGAG	21	-0.00604454
MED30	GGCCGCGTCGGGGATGGCGCC	21	-0.00600463
PRPF19	GCAATTTCCGTTAGGTGCTGA	21	-0.00596525
RPL21	GGTTTAACCCGCCCATGCCAA	21	-0.00594704
XRCC5	GGACTTGGGCTTTACCCGGAC	21	-0.00594381
DKC1	GATTTGCTGGCTCGGCCAGTA	21	-0.00592428
PMF1	GCGGTGACGTGGGTCCGCGTT	21	-0.00592234
TREX2	GTCTTGCCGGCCAGTGAAGCC	21	-0.00590695
POP5	GCAGCGGACAGAATTCACATC	21	-0.00587969
MRPL22	GTTGATGTTGCAGGTGCGTTA	21	-0.00583662
MED27	GACGTATCTCCGAAGACCTCT	21	-0.00582858
EBNA1BP2	GGTAGGTGTCAGCCGAGCTCG	21	-0.00582769
CSE1L	GCGAGAGCGGAATGTGGGCCC	21	-0.0058268
MRPL34	GTCGAGCCCACTGGGGCTCCG	21	-0.00577405
RPS6	GGGACGCCACCATGGCGCTCC	21	-0.00570874
PSMD4	GGCTCCTTACCTCCGGGGCCA	21	-0.00570798
CHMP2A	GCCATAACTTCTTTTGGGGCA	21	-0.0056762
TTI1	GGTCTTCAGGGTAAATCGCAG	21	-0.00563613
RPS19BP1	GGCGGCGGACATGGCGGCGCT	21	-0.00561875
THOC7	GCTGTTTACCCGGCTGCATTG	21	-0.00561147
EFR3A	GTGCCGTCGGCGCTCCCTGCG	21	-0.00557858
POLR2B	GCTCCTGGCGCTGCTGGCTTC	21	-0.00557501
RPS27A	GAGACTCGGCGGTTGAAAGCA	21	-0.00553672
NUPL1	GAGATGCTGCCCGGCCCGCCT	21	-0.0055166
RPL28	GTCCCGCCTGACAAGAGTTCT	21	-0.00550671
EIF4G2	GCAGGAGGCCGCCTTCCTGCT	21	-0.00550438
EIF5B	GAGAGACCGAATAGAGGGGCT	21	-0.00548815
NUDC	GTTGGGCCCGGCGCGACCCGC	21	-0.00544935
SRBD1	GGAAGTTTTTCAAACGCCAGA	21	-0.00544519
NOP2	GCACGGGTAGCGCTAGCCTCG	21	-0.00539747
TRAPPC5	GAGCTGAACTGCCGTAGGGTC	21	-0.00536267
EIF2B5	GATCCAGCACTTGAAATGCGA	21	-0.00535382
MCM10	GGCGGGATCCGGTTGGAATTT	21	-0.00534265
THOC7	GTCGGGAAGGCCGAAGCGCTC	21	-0.00532437
MED7	GCGGAGCTAGAATTTCGTTAA	21	-0.00529002
DDX27	GCACTCTTAAGAGGTCGAACG	21	-0.00524948
PARS2	GCAGGAGGCGGGGCTTAGGAG	21	-0.00522049
MRPS9	GGGACACGCCCCCTGATCCAA	21	-0.00519913
SKIV2L	GAGCTCGGATGCACGGGGCAC	21	-0.00518622
RPL10	GGCAGTACAAGTCAGGAATTG	21	-0.00517369
RABGGTB	GCCTGAGAGGCGCATCTGCGC	21	-0.00516997
RPL4	GAATCTGTAGGAGATAGAGCG	21	-0.00507389
PET112	GTGAGGTGGAACTGCAGGACT	21	-0.00504365
RRM2	GTCCTGGCCAGCAAGACCGCG	21	-0.00503105
WDR5	GAGGGGGCGGTGTCCGGGGGG	21	-0.00498499
MRPS14	GCGGAAGGAGAACCCCTGGAC	21	-0.00496903
PMPCB	GTGGTGTTGTCATCCGCGGCG	21	-0.00496193
MED19	GTGGCCCTTTTTACCTCATGA	21	-0.00495416
ZNF574	GTCAAGACTGTCCAGAGAAGT	21	-0.00493952
LDB1	GCCCCCAGCAGAGGGGCCCGG	21	-0.00493035
RPL6	GAGAATTAAGGTCCCGGCTTC	21	-0.00492485
CDC16	GGCGGAGTGTGGCGTGAGGCC	21	-0.00488045
NOP10	GGTTCTTCCCCACCTCGGTTC	21	-0.00486406
CDC73	GTTGGTTCGTCGCggcggcga	21	-0.00486091
ORC5	GTCCATCTTGCAGTCCTTGTT	21	-0.00482888
VPS54	GCACACCTACCTGCGGGTCCC	21	-0.00474747
RPS27A	GTGAGAAATAAGCCCAGGCTA	21	-0.0047361
NRDE2	GTGGTTTTCGCGGCGCTCTCT	21	-0.00470787
RPL6	GATTGCTTATAGACCGGAAGC	21	-0.00468738
CPSF2	GGCTTTTCTACGTCTTGAACC	21	-0.00468618
TARS2	GCAGGCTACACACGGTGCGTG	21	-0.00467165
RBM28	GGGGCGGGGCGGTCGAGGATA	21	-0.00460111
PWP2	GTGGTCTGCTTTTGCGGCGTC	21	-0.00459078
RPL23	GGCAGTGCTCTCGCGGTGGCC	21	-0.00458663
EFTUD2	gaaattaaaaagcgtcagatc	21	-0.00458443
TAF2	GAACCAGGAAGTCTTGTCAAT	21	-0.00456633
AQR	GGAAGCGGAATGGCGTGTAGC	21	-0.00453835
CENPT	GTAACGCACAGAGAGCCAGCC	21	-0.00453324
NAT10	GCGCAGGTACCCAACGCGGGA	21	-0.00451462
COPZ1	GTTTCTTTTGCGGCTCCACGT	21	-0.00447146
MYBBP1A	GCCCCAGGGGGGCATTTCTAA	21	-0.00446023
EMG1	GCTTGAATCCATCACTGGGCG	21	-0.00445446
TICRR	gcggcgccgcccgccacagcc	21	-0.00445348
SKIV2L	GGGTCAAAGTTCATTCCATAT	21	-0.00444004
RPS14	GAGTGCGGGTCCAGCCTTTTA	21	-0.00441633
SEC13	GCTTAGAGATTTGGGGGGCTC	21	-0.00441099
RPS23	GTGGCTTGTGGCTCCTTCCTG	21	-0.0043623
EIF2B4	GGCCCAAAGGCGCTCAAGGCC	21	-0.0043538
MED22	GAGCCCCTTGTCCCGGCGCAC	21	-0.00434787
NLE1	ggggcgtcgccgcggggcgcT	21	-0.00434374
PSMC4	GCTGACGACAACGGAAGTCCC	21	-0.00433408
SHFM1	GCTTGGGTGCTCGGGCCCAGC	21	-0.00430759
OXA1L	GACATTCAGGTCCCGGTGAGC	21	-0.00430114
ZC3H8	GAGTCCGTGGCCGTTTTGCCG	21	-0.00412332
CPSF2	GGTGGGCACGGTGCTGTCGGA	21	-0.0041108
TRAPPC5	GGTCGCGGGGCCCTGACCCTA	21	-0.00409908
DBR1	GGGAAGGTCAAACCTAATTCT	21	-0.00408971
THOC7	GGCCGAAGCGCTCTGGCGAAG	21	-0.00407669
SEC61A1	GCAGGAAGCGGAAGCGATCCG	21	-0.00400996
NUP160	GGAGAATGAGGGTGGGCAGCG	21	-0.00399559
PNPT1	GTTTCGTTTCCGCGGTGCCCG	21	-0.00391129
CENPT	GAGGAAAACACTAACAGAATA	21	-0.00390271
RPL19	GCCTACCCCAAACCCCGGGAC	21	-0.00389815
RBMX	GGGTTCAAGCTCCAACGAGCT	21	-0.00385506
EFTUD2	GTGTGCGCGCTTCGGAAGCCT	21	-0.00384174
UBA1	GACGCCCCCTAAATATCACCC	21	-0.00383749
MRPL17	GCCTGCCTCGTTGGCAATCTC	21	-0.00375957
RPL10	ggTTCGAGGCTGTAACACCAC	21	-0.00368633
TTK	GTGCGAGGCTCTGCCGCTAAG	21	-0.00368521
CENPT	GCAACTAGAGGGACCGGGGAG	21	-0.00364416
PSMA3	GCAAATGGCCCACCCAGCCGA	21	-0.00363781
RPL7A	GCATTCCGCTCTCGGCCGCCC	21	-0.0035946
RPL23	GCAGTGGCTGGCGGATTCGTC	21	-0.00353177
SPCS3	gcggtgcaggacgccgggacc	21	-0.00352945
CIRH1A	GAAGTGCGCAGGCAGTGCTCG	21	-0.00350435
LLGL2	gcccgaggcctcggcgtccct	21	-0.00350264
COPZ1	GCCTCCATCTTGCCCCGCAGC	21	-0.00349015
RPL28	GCGACTGGGAACTTGGGTGAA	21	-0.00348745
RPL11	GGCTCCATATTCCTCGGGCTG	21	-0.00347731
LLGL2	GCCCCCTCGGGGCTTCCACCT	21	-0.00346563
RPS27A	GCAATCTACCAGACGCTCCTT	21	-0.00346357
PSMC2	GAGCCCAATTTACTTCCGGTG	21	-0.00346319
GFER	GCCGCCTCCGGGAGGCGTCCT	21	-0.00343745
CIRH1A	GTGGGAAGCGGCTGCGAGAGC	21	-0.00343178
GART	GTTGTTTGTAAATGCGGTGGG	21	-0.00342497
SRSF1	GGCGCCATTTTGGAGGGGCCG	21	-0.00341983
RPL12	GGAAAGCTTTGCACGCGCGGC	21	-0.00340244
MIS12	GTATTTGCCGATTCAACGCAG	21	-0.00338696
PRPF18	GACCCTGCGGTCGTGGGGGTC	21	-0.00337878
RACGAP1	GATACTATGATGCTGAATGTG	21	-0.00332934
ATP6V1A	GAAGTCCTCAGCTGCACAGGT	21	-0.00328317
NAE1	GCCGTGCGGGGCGCGGGAAGC	21	-0.00328199
CDC23	GGGGCTTGGATCCTTGGCCTT	21	-0.00326933
EXOSC5	GACCCTGTTCCATTTTCAGCA	21	-0.00325105
ARCN1	GGAGCCCCGCCCTGAGGGTCT	21	-0.00324814
LLGL2	GCCCAGGACCCCTGGGCTGTC	21	-0.00322397
GART	GCTGGGGACTGACAACTTATG	21	-0.00319385
NUP62	GTACGGTGGGCCGAAGGCGCG	21	-0.00318366
RPA1	GGGGGCTGGGCCGGCGGTCCG	21	-0.00316521
KANSL2	GGAGCCAGGATCTCCGGTGAC	21	-0.00312486
EEF1G	GCTGCCGCAAAGTAAGCCGCC	21	-0.00312455
THOC7	GTCAAACTCCCACAATGCAGC	21	-0.00312028
EFTUD2	GCCGCTGTCGCCTTTCTGCCC	21	-0.00308155
CIRH1A	GCCTGAGAGCGCGCGCGCACG	21	-0.00307563
MRPL34	GTTTGGGCTCGTAGGAAGCCA	21	-0.00304108
FIP1L1	GCGGGAGACCGCCGCGGGGAC	21	-0.00300804
CLTC	GTACATAAGGCGGAGGGGGTG	21	-0.00296914
EIF2B4	GGCGGGCGGAGCCTAGGACTG	21	-0.00296238
NAA25	GCCCTTTAATAGCCCTTTCCC	21	-0.00293431
RRN3	GGCCGCTTCCTTCTGCGTATC	21	-0.00291822
PRPF18	GGCCCAGTGAGGCTGGGTTCG	21	-0.0029059
HAUS4	GGCGGTGCCGAGAACCTCGGC	21	-0.00288966
GTPBP4	GGGGCCGCCTACCTTGGCGGA	21	-0.00287835
RPP40	GAGTGCTAGGCTTcgcggggc	21	-0.00286825
EIF3E	GTGAGGGGGTCTTTGGGCGCA	21	-0.00285462
MED12	GGCCCCTGAAGCGGCCGCGGC	21	-0.00283189
PSMA5	GAATTATGGGTGGGCAGGCCC	21	-0.00281338
CLTC	GGAGGGGGTGAGGCGACTGGG	21	-0.00278902
HSPA9	GGGGTCACGGCCTCGGGCCTT	21	-0.0027761
RPL38	GGGACCCCAGGTCCGCGTGGA	21	-0.00276382
RPS18	GATCGCACCGCCTCTTCCTCC	21	-0.00275432
POLR2B	GCCTTTGCCATAGCTTTAAGT	21	-0.00270514
CCDC157	GAGGTACCTGTTTGGGCTCCG	21	-0.00267808
TUBGCP3	GTCTGCGGGCTTCGCGTCGCC	21	-0.00267734
EIF4G2	GGCCCGGGTCGCTCGACGGGG	21	-0.00267593
EIF2B2	GACCACACAGTTTGCACTTCC	21	-0.00267546
NAE1	GCAGCGCGCAGGAGACGGTAG	21	-0.00267398
DHX15	GCGAGGATGTCCAAGCGGCAC	21	-0.00267369
EIF4E	GACCGTGTTTTTTGCACAGTT	21	-0.00267271
NOP58	GCATTTGTGCTTTGCCCGCCG	21	-0.0026649
RPS6	GTAGGAGAAGGCTCGCCTTTC	21	-0.0025973
GNL2	GTGACGTACGTCGTGCACACG	21	-0.00259619
RPS19BP1	GCCTGGATTGTTTTCCATCCA	21	-0.0025882
SMC2	GCTCCTCCGGGTCACAAAGGC	21	-0.00255259
RPL4	GGTTCGGAGCATAGAATCTGT	21	-0.00254424
MYBBP1A	GAAGCGACGCAGAGTGGCGCC	21	-0.00254415
DDX21	GGCAACCTGCGCTGAAGATGC	21	-0.00252469
UTP3	GGCCACCACTGACTTCGGCGC	21	-0.00248496
TWISTNB	GTCGGCAACTCTAGGCAAGGC	21	-0.00247714
TP53I11	GCCTGCGCAGCGCAACCCAGC	21	-0.00245574
TAF8	GTGCGCGAGCGCGGGGCGCGA	21	-0.00242855
ATP6V1A	GAACGGCGACTTTTCTGCCTG	21	-0.00242474
BDP1	GTTGCGGCGTCCTGTGAGCGC	21	-0.00237866
MED17	GGAGGCTTCCCTGCGGAGAGC	21	-0.00237137
ATP1A1	GAGCTAGGGCTGCCGCGGGGC	21	-0.00235565
EIF4G2	GCGAGAGGGGGCCGGGTGTAC	21	-0.00233527
TICRR	GTCACAAAGTAATGCTGCTGC	21	-0.00232427
RPL19	GGACAGGAATACGGACGAAAT	21	-0.0023117
PARS2	GGGCGCGGAGACCTAGGACCC	21	-0.00231118
DDX54	GAGGCCGCGCCTCGGCGCTTC	21	-0.00229808
POLR1D	GACAAGAAGGGCCGATTCGAG	21	-0.0022922
CTDP1	GAGGGCGCGTGACGTCACGCA	21	-0.00227375
PLRG1	GTTTTTTTTGGCAGTGCGCGT	21	-0.00224364
PFDN2	GTAAAGGCCTGCACAAGCCAC	21	-0.00222393
MRPL17	GGGAACGCATGCGCCTTAGCT	21	-0.00222351
CDC23	GCAGATATTTTTGGTGCAGAT	21	-0.0022087
RPL36	gctgaactgtgcctcagaaca	21	-0.00220705
NUF2	GAGGCGGAAGAAACCAGAGCC	21	-0.00220369
RPLP2	GTGGCGGCCGCGCTCCATGTT	21	-0.0021909
METTL16	GAGGTGCCGACTTCGGGGTCT	21	-0.002172
EEF1G	GGGGTCTACAGACTGTACTGC	21	-0.00216839
PSMC1	GTCCCTAACGACTTCCGCCTC	21	-0.00215565
CCT6A	GTGCCCGCGCGCCGCCGCCAT	21	-0.00214907
TONSL	GGGGGAGCTCCTGGCCGGCCA	21	-0.00214571
ESF1	GCCCCCCTGCGGTACAGGAGG	21	-0.00210778
MRPS9	GCTCCAGGACCGGAGGGGTGA	21	-0.00207851
ADSL	GCTAAACACGAAGCACATCTC	21	-0.00206617
ATP6V1A	GAACGACCACACTTGGGGGAG	21	-0.00206084
RPS14	GAGTTCGTTCCTGGTCTCAGA	21	-0.00204385
INTS8	GTTGGAGCCGGGAAGCGGCCC	21	-0.00202336
MVD	GTGAGGAGGCAGAGGCCTCTG	21	-0.00201977
ATP1A1	gtggcaacagcggtagcagcc	21	-0.00200688
MED11	GCGCGTAGTCTCTCGTTCGCC	21	-0.00199671
PMPCB	GACTCTCAGGTGCGCTGCGCC	21	-0.00196661
EIF4G1	ggcccggatggcggcggatgc	21	-0.00195542
RPS23	GCGCCGCGCCTGACCCGAGGC	21	-0.00194467
RPS5	GCTTCTAGCTTTTCCCCATAG	21	-0.00189018
MVD	GGGAGCGAGGCCGGGTACGCG	21	-0.00187931
CCDC174	GAACTGGATTTTCTTCTCCGG	21	-0.001862
RPLP2	GTCCAACGCCCCCACGAGTTT	21	-0.00183372
TCP1	GTATCGCTGCCGTCAAGATGG	21	-0.00181003
RPLP2	GAAGGCTCTGGGACCCGTGCG	21	-0.00179461
RPAP2	GAAAAGCCGCAGGTAGGAGCA	21	-0.00177578
THOC7	gcgcggcTCAGGCGTCGGAGC	21	-0.00176963
EEF1G	GTACGACAGTTCGGTATCCAG	21	-0.0016806
IMPDH2	GGGGCTTCCGAGAGCCGCCTT	21	-0.00166885
RPL15	GGGGCTGACGAATGGGGCGCC	21	-0.00165889
EIF4G1	GAATTTCCGGTCTGGTTGGTC	21	-0.00165777
PHF5A	GACGGAAGTTCCCGAAGCTTC	21	-0.00165558
NUP205	GCGGCTCCAGCCCTCGAGTTG	21	-0.00164255
PSMD6	GGCGGAGACGGGACCGGAAGC	21	-0.00163252
ECT2	GCTCCGGAATTCGCGGTCACT	21	-0.00159748
DBR1	GGTTTCCAGATCTCGCGAGAG	21	-0.00159517
MRPS9	GGGTAGCCTCGCCCGGAAGCA	21	-0.00158236
MINOS1	gctcgccctggccggaggggc	21	-0.00155892
MINOS1	gctcgccctggccggaggggc	21	-0.00155892
TTC1	GACGCTATTAGTCGTCATCGA	21	-0.00150344
GTF2B	GAAGCGGCGGGACTGGCCGAC	21	-0.00148492
CENPC	GTGTTGTTAGCGCGCGCCTTC	21	-0.00147063
RPL5	GCTACATACTGCGCCTGCGCA	21	-0.00146494
PRPF8	GGGCTGGATGCACTGTGTGGC	21	-0.0014611
MRPL22	GGATACATAACCTGAGGAGCC	21	-0.00144138
POLR1D	GCCAGCGGCGAGGGGACAAGA	21	-0.00143183
RPL36	gcagactcctctcctacaggc	21	-0.00143111
ACTL6A	GCGGCGCAGCCGCATTCTGAT	21	-0.00141359
DDX54	GGCCGACAAGGGCCCGGCGGC	21	-0.00138577
EFR3A	GCCCGCTTGGTTGCGTGACCG	21	-0.00136134
RPL14	GCGTTCTTCTACACATGCGCA	21	-0.00135063
MRPL24	GCACTTCGGATTTTCAGCACA	21	-0.00134496
SEH1L	GCCCGACGGAAACCATGTTTG	21	-0.00132619
PSMD1	GCGGGGTGGCGGGCAGCCCCT	21	-0.00132453
TBCD	GGCTTTCGCGCTCTAGCGGAG	21	-0.00130616
RPLP2	GTCAGGCACTTTTCGCGGCAA	21	-0.0013011
DDX23	GCGTTCTTTCCCGCCTCATCC	21	-0.00122559
CENPT	GCTACCCACCTACGAAGGATC	21	-0.00119819
PMPCB	GCAGCCGCCATTTCTGCTAGA	21	-0.00119593
EFTUD2	GCGATACGATTTTACGGACTG	21	-0.00119244
TCP1	GAAGGGCGCGAAAGCGGAGAA	21	-0.00119058
CDC73	GTGATCTTCGGGGAGTTCTCC	21	-0.0011726
EXOSC2	GAGGCTTCAGAGAGCGGCTTC	21	-0.00116643
SPDL1	GTTTTTCCTTTCCGCGCGGCT	21	-0.00115985
RPL36	gtttgtgtgacttagctcaac	21	-0.00115271
GART	GACTGACAACTTATGCGGACA	21	-0.00114755
NSRP1	GGTGGCCCGGATCCTGCTTGT	21	-0.00113495
SPDL1	GGAGGGGGTGGGCGCTCCATT	21	-0.0011233
COPB2	GCGATAGTCAGAGGCCAGGGC	21	-0.00111958
NKAP	GCCCCCTTGTCCCACGGCTGC	21	-0.00110137
METTL16	GTGTCCAATCACGAGGCTAGA	21	-0.00109846
UMPS	GACGTGCAGGCTTTCAAGTTT	21	-0.00109157
TREX2	GAGCAGCTCAGGACAAGGGGA	21	-0.00108641
LLGL2	GAGTCCGGCACGCATCTCACC	21	-0.00108096
RPLP2	GCTGGGGACGCGGAGTCCGTG	21	-0.00101608
MRPL39	GCGGGGCCGGGGAGGTCCCGC	21	-0.000979515
TBCD	GATCTGCGAACACGTGAGGCG	21	-0.00096449
RPS13	GAGAGGAAGCGGGGACGTGTG	21	-0.000938074
NUDC	GTCCGCCTTCCGCAGCGGAGC	21	-0.000932268
HAUS7	GCCAAGAAGACGGACCCCgag	21	-0.000892524
SMN2	GAGTGACGACTTCCGCCGCCC	21	-0.000889607
SCFD1	GAGAGTGTGGCTTGATTCGGT	21	-0.000839278
NBAS	GGCTGCTGCTGTAGATGGGCC	21	-0.000830347
MCM10	GGGACCCCGCGCCTCTAGCCT	21	-0.000810377
PSMC1	GCTCATGTCCACCGCGGGCCG	21	-0.000784594
BCCIP	GACTGGGGGATCCGGCGGCTG	21	-0.000778869
MRPS33	GAGGGCGGGCCTTCCGGGACG	21	-0.000777894
PLRG1	GAAGAAGAGACCACTCGGCCT	21	-0.000772817
UBA1	GTCCCCAAACGGCACCCCTTA	21	-0.000759729
NAT10	GGATGCAGAGCCTTCATCCTG	21	-0.000728241
MRPS33	gaagctaatatgcaaaattca	21	-0.000706187
NOL11	GAGGTCGCAGGCTGCGAGAGC	21	-0.000683249
TTK	GACAGAGCGTGGAGTCATTTA	21	-0.000618814
POLR2G	GTCCAATAACCTGCCAGCGCC	21	-0.00061857
CHMP6	GGCGGCGGTGGCGATTGGACT	21	-0.00061143
NSRP1	GCCGAGGAGTTTTAAATGCGC	21	-0.000581396
EEF1G	GAAGACATACGTACGACAGTT	21	-0.000581091
TPX2	GTGCATTCGACTAGGCTGCCT	21	-0.000564923
TIMELESS	GGCCGCAGCCTTTCCGCCACC	21	-0.000558693
RPL36	gggcatggtgaccctgcctgt	21	-0.000527688
RPA2	GCTTCAGCCAATCGGTGCTCA	21	-0.000514259
SRRT	GGCTAGATTTCAGGGCGACCT	21	-0.000500583
SF3B2	GCCGCCACCTCCAGGCCACTA	21	-0.000498602
PRPF18	GAGCCGCTTCCGGCGGAAGCT	21	-0.000494983
POLR2H	GGAGGGGCCGGCCCGGGTTCG	21	-0.000477439
RPL21	gcggccccgccTCTTTCCTTT	21	-0.000475506
CSE1L	GCGGAATGTGGGCCCGGGGTT	21	-0.000434664
NIFK	GGGGCGATGGACCGGGTCTAG	21	-0.000394929
SMC2	GGGTGTTGAGAGCGGTGTGGC	21	-0.000386706
VARS	GAACACGTGGGCGCCGGCTGC	21	-0.0003831
SRBD1	GGCCCCAAAGATCCCGGAGCC	21	-0.000366244
POLR2H	GCGGATGCCCGGGTCGGAGAG	21	-0.000361357
POLR2H	GCGGGTCTACTGGCACGTGGA	21	-0.00036039
XRCC6	GTGTTGTTCGCCAGCTAGGCC	21	-0.000354767
WDR43	GTGCGCAGGCGCACCGGCGCG	21	-0.000343959
RPL3	GTAGAGGCCGGTCGGCCTTAC	21	-0.000318234
DLST	GAGCCGGGGCCCCGACGGGTG	21	-0.000311355
RPL3	GGGGCGCGCTCGCACGCCGGA	21	-0.000250382
PRPF19	GGAGCCCGGCGTGTGGCGCCT	21	-0.000239824
RPL17	GAGGGCCTGACTTTGGGAGCC	21	-0.000233708
DHX15	GCTCGGGCTTTGTTGGGGTCC	21	-0.000192463
TAF1	GGGCGTGGGGGTAGGGCTCGG	21	-0.000191959
KANSL2	GCCGGGACAAAGGCGGCGTGC	21	-0.000177685
CENPT	GGCGCCCGCCTGCCGCAGCCG	21	-0.000169595
RBM28	GCTCGCGTCCTCACGCGCTTT	21	-0.000102138
DONSON	GCCGCCGGCTCCGTCAGCTCA	21	-4.84e-05
VPS13D	GCTAGGGCTCCGCCTGGACAT	21	-4.45e-05
POLR2H	GAGTACGTGCACCCCCTAGCG	21	-1.19e-05
CENPT	GCACCGGCCTGCGCCATGGCC	21	1.82e-05
TREX2	GCGAGCTCTGGAGTGTGACCA	21	2.24e-05
NIFK	GGGTTGCACGGTTTCCGGCCC	21	9.97e-05
RFC4	GGGCACGTAACGCGTCACTTC	21	0.00010142
EBNA1BP2	GTGATTGTGTCCTGCAGTTGC	21	0.000102516
MRPS2	GTCCACTCGGCAGGCAACGAT	21	0.000107842
SCFD1	GCTTTGCTTCCGGGGCGGTAA	21	0.000159901
PRPF4	GCAGGGAGCGCTAAGGGGGAA	21	0.000170454
MTOR	GACCCACGGCCAGCCTGCCCG	21	0.000205144
LLGL2	gcgggggggtttccaccatgt	21	0.000248433
DDX21	GATTCCAAACCAGCGTCACTA	21	0.000261418
MRPL24	GCACCGGAAGTTTGGAGCGGG	21	0.000262757
UMPS	GGCGGAAGAGGCGGGACTTCG	21	0.000266857
NUP93	GCTTCTGGGAGCGGCCAGCCT	21	0.000272501
RBMX	GATTATATCTCCCTGGAGATG	21	0.000350283
BUD13	GGGGTGAGTTGGTACCGGCCG	21	0.000420979
UBA1	GTGCTTCCCTAATCCCAACTT	21	0.000443512
BMS1	GGCATATTTCTCATCTGGCGG	21	0.00044727
RPL30	GCGGGTTGCCATTTGTAACTC	21	0.000449524
EBNA1BP2	GTTGCTGGCGCTGGAGCGATT	21	0.000489816
EBNA1BP2	GGCCGCCCTCTGCTAGCCGCT	21	0.000535194
POLR1D	GCCCGCCTCCCCCACTCGCCC	21	0.000536623
RPL31	GCCTGCGTCGGGCGCGGTGCC	21	0.000621021
DCTN3	GACCTTTGTTATTTCAAAGGC	21	0.000640525
VPS54	gcggccgTGGAGCAGCAGCCT	21	0.000704585
RPS20	GGTGAGGCGGCAGTCGGCGGC	21	0.000724655
CPSF1	GCTCACGCGGCGGCGCTGCGC	21	0.000746602
RPL6	GGAAGGCCTCTCAGTTAGCCT	21	0.000760843
TBCD	GGAGGACGAGACACTGGCCTT	21	0.000769459
MRPL34	GTGTTCGTCATCCCTGCAGCG	21	0.000791213
TTC27	GCCACTAGATTTCAGCGCCTT	21	0.000807838
RBM8A	GATTCCGCCCCCTTCAGGAGA	21	0.000821239
MRPS27	GGTTGGCCGGACAGCTTCATT	21	0.000829737
IARS2	GGCCACTGCCCGAAGTTTGTG	21	0.000829951
DDX56	GAGGGCTGGGGAGCCGGCTTA	21	0.000869164
CCT3	GTCCCGCCCCCTACGCAAGAA	21	0.000874819
SNRPG	GAGGTCGCCGGGATCCCGGCC	21	0.000884732
NIP7	GGGCTCCTGGCGTCGCTGTTC	21	0.000887225
RPL19	GGCTCCTCCCATTATCTGCGA	21	0.000906547
WDR5	GGCGCAGTGCGCGTGCGCGAG	21	0.000917036
TP53I11	GCGGCCGGGGCTTACCGAGTC	21	0.000919894
XRCC6	GTCTGCGTTTGAGATCTCATT	21	0.000935668
TCP1	GGAAGTGAGGCTCCGGGGAAG	21	0.000937783
ORAOV1	GCGTGCGCATTGGGGAGCGCC	21	0.000942664
GFER	GTTGCCCGCGCAAGGCCTGCC	21	0.000959769
RPS29	GATTTTGGGGAAGCGTTGCCG	21	0.00101251
RPL19	GAATACGGACGAAATTGGAGC	21	0.00105358
NAT10	GATGAAGGCTCTGCATCCGGA	21	0.00106587
CTDP1	GCCTAGCCCGCGCCGACTTCC	21	0.00108294
ZNF574	GGGGGTGCGCGCCGGGCAGTT	21	0.00110345
CTNNBL1	GGCATGAGAAGTTAGAGGGCC	21	0.00110964
TTI1	GAGAGATCATGATCTGGATAT	21	0.00112035
CCT4	GGAGGCTGTCCGCTGCGCGCC	21	0.00114285
EIF3E	GCGCATGTGCTGTGGTAAAAC	21	0.00114306
EBNA1BP2	GGAGAGGGGGCCTTACACCCC	21	0.00119095
SMU1	GTTCGCGCCTTGCCGGGGGCC	21	0.0011984
CIRH1A	GGCGCATAGTCGGAAGTGCGC	21	0.00124244
NCBP2	GTTTGCGGATTTCAGCTGAAT	21	0.00126904
CEP192	GCATGCGTCTGCCTCCCGCCT	21	0.0012787
UMPS	GTCATCGGGGCGCCGGAGGCC	21	0.00128735
CHMP6	GGGCGGAGAGACCGAGGGGCC	21	0.00130563
EIF6	GACAGTAGGTGTTGGTGAGCT	21	0.00131126
FTSJ3	GCGGAGCGAGCGTGATCTGAG	21	0.00131624
RPP30	GTCTCTACCTCCAGTTGACTA	21	0.0013494
VPS54	GCGATGCACTAGGCCTCGCTC	21	0.00137524
ATP1A1	GGCTCCTTCTCCTGGGGACGC	21	0.00138017
TP53I11	GAGAGTCCCCCGTCCCCAGGC	21	0.00139023
INTS4	GATCCAGAACCGATCCGGACC	21	0.00145989
POLD3	GGGTCCTGGGCCCGGCTAGGG	21	0.00147724
EEF1G	GAGGAGTTCTGAGGTTGAGTG	21	0.00148828
TSEN2	GACCGGGCGCACTCGGAAGCC	21	0.00152606
GNE	gcttgggttttgtagccatat	21	0.00155154
CCT6A	GAGCGGGCGCCGGACGACCTG	21	0.00156621
RPL11	GTTTTGGGCCAGCAGGCATTG	21	0.00158131
UBA3	GTGCCCACgcgcggcagggcg	21	0.00158993
CHMP2A	GAAACGCTAAGTACCAAGAAC	21	0.00162007
MRPS2	GTGGCCCGGTCCCCCCGCGGG	21	0.00166435
CEP192	GTTCCGGGCTCCAGCCGGTGC	21	0.00166905
RBM8A	GGGAATCGAGGAACCGGGTCT	21	0.00169422
SUPV3L1	GTCTTTCTGGACAGCAGGCGC	21	0.00169908
LLGL2	gtcgcccaggcagcagtgcag	21	0.00170278
NUP54	GCCAAGGGCGTAGGAGGTGGG	21	0.00170578
SEC61A1	GCAGTGGAACGCGCTGGGCCG	21	0.00173045
DKC1	GGCGGAATCCGAGGCGCCCGC	21	0.00176083
CCT6A	GCACGCTGGGGGCCGGCCAGA	21	0.0017752
RPL36	ggagaggagtctgccaggatg	21	0.00178122
SNRPD1	GAGGAGCGCGACTGCGGCCCC	21	0.00178685
RPS14	GGGTAGTTATTTGTGGTGTAg	21	0.0018043
RPL38	GTTCTTTTTCGTCCTTTTCCC	21	0.00181052
CARF	GGCTATCGGCGGCGGCAGGAC	21	0.00182408
GART	GGTTCCCGCTTGCCCGCTCGC	21	0.00182906
RPAP1	GCCTCCTCTGTGCATAGATCT	21	0.00183665
CDC16	GGTGCGGGGCCCAGGCCTCGC	21	0.00185024
EIF4E	GAGCGCGGGGACCCGTGGGGG	21	0.00187923
CCDC174	GTTCGGGGGTTCCTGTTTGAG	21	0.00189704
EXOSC2	GATATCCGACTCCACAACTCC	21	0.00190626
DNAJA3	GTCTCAATGTCAGCAGCGCTC	21	0.00197329
EIF4E	GAACATTAAAGCCTCTATTGA	21	0.00198607
MRPL34	GCATACACACCAACAGGTAGC	21	0.00199146
DDX21	GCTACGGGAAGTGACGAGAGC	21	0.00200577
MED10	GCGCGGGCGAGCTCTTGGGGG	21	0.00204128
RPL11	GAAAGCGGAGCTTCCGGCCGA	21	0.00207653
POLR2H	GGGCCTCCCGAGAGGCGGCAA	21	0.00210817
PSMC1	GACCGCGCTCATGTCCACCGC	21	0.00211152
MED12	GCTGGGCAAGATGGCGGCCTT	21	0.00211843
BUB3	GAGGCGACGGTGTGCGGGAGC	21	0.0021455
PRPF4	GCGCTCCCTGCCAGAGTGAGC	21	0.00218448
SRBD1	GGTTCTCAAGAGCCCGGCGTC	21	0.00218779
CWC15	GATTATCTTTCTTATCGCGAT	21	0.00220509
NUP160	GCGCGGTCGCCGTCACTTCCG	21	0.0022201
LLGL2	GTTTCCCGCAGAACTTTCTAC	21	0.00224877
NPAT	GGTTATTGGACCCGGCTATGC	21	0.00225158
RPL3	GCGCTCGCACGCCGGAAGGGG	21	0.00231239
POLD3	GTAGTGCGTCGCCTCCGTTGC	21	0.00235665
EIF3F	GTGCGCTCTGCTTTTGGCCCG	21	0.00240362
XRCC6	GCTAACGCTAACCCTCTAGCA	21	0.00240924
CEP192	GCACGCGCACTTGCAGTGCCC	21	0.00242494
NAE1	GACCGCGCCGCCCGCGCCCTT	21	0.00242806
OGDH	GGGGCCGAGAGTTTGGAGCCC	21	0.00246423
CCT4	GCGCTGTGGGTGAAGAGCGCC	21	0.00246693
DHX8	GAGGTCCCTGGGACCTCAGTT	21	0.0024735
PES1	GTCTTTCCAGTCTCCACGAGA	21	0.00248804
REXO2	GCGCCACCTTCGCGGACACCT	21	0.00250051
SNW1	GGGAGGGCGTAGCCGTAGTCT	21	0.00250716
SUPT5H	GATCTGAAGTCTCTGACCTCT	21	0.00259084
PDCD11	GTGCAATTCTTCCGGAAGTGT	21	0.0026162
WDR5	GGCCCCTTGGACACCTTCCGG	21	0.00268193
DKC1	GGAGGAGGCGGGGCCATCCCG	21	0.00276139
UBA1	GTTTCCCCGAAGTTGGGATTA	21	0.00276479
PSMD7	GAGCGGGGTGTGTCGCGATGC	21	0.00283975
PET112	GGTCCACATCCAACCAGATTA	21	0.00286635
GART	GTCGGCCCACCGGGACCGGCG	21	0.00288108
RPL3	GAAATTACACACTCTACGGCG	21	0.00290278
NAE1	GAAAGCCCGCCGGCCCGCCCT	21	0.00291605
IMMT	GAAATATCCAGCTCATAGAGC	21	0.00292464
PSMD1	GAATTCGCGCCGGGCGGCAGG	21	0.00292713
CDC20	GGGTGGCCCTGATTTTGTGGC	21	0.00297733
NUDT21	GCCTCTGGCGGCAGGAAGTAG	21	0.00301598
DDX54	GCGCTGCCCGGAGCCGGGTCT	21	0.0031022
ZCCHC9	GTAAGAAGCTGCGCGGTAGCG	21	0.00312459
PSMC1	GCTGACCAAGTTGTGCTCCAA	21	0.0031429
CASC5	GATTGTGGGGGAGGTCTCCAC	21	0.00317626
SHFM1	GGCCTCCGTGTGGAGGTAGCT	21	0.0031958
CPSF2	GGTGCTGTCGGAAGGCGACGG	21	0.0032473
PHB	GGAAGCGTGGATCTTGGAAAG	21	0.00324757
MRPL34	GGGAGCCCGAGCCCTCGCCCA	21	0.00325442
RPL15	GTCGTCTTATTGTACTTAAAG	21	0.00328522
CMAS	GTAGTCCGCGGCCGCCTCGTC	21	0.00332676
MED14	GCTTCCTGTTCTGAGGCGGCC	21	0.00336921
NEDD1	GCCTCGCCCCGTGACGTCACT	21	0.00338273
DNAJA3	GTAGAGGGGCCCGGCCGCCCA	21	0.00339072
RBM22	GCGGGCGACGTCATGACGCAA	21	0.00339959
SF3B2	GAGCTCCGATCTCTGCCAACT	21	0.00342564
EIF4G2	GAGGTTCCTGCTGCCATGTTG	21	0.00344273
RPS24	GAGCTATAGGCACGCGAAGCC	21	0.00345348
MIS18BP1	GCGTGCCAATCCCGGGCTGGC	21	0.00345781
ZNF574	GTGCAAGGGGAGCCGTGGCCC	21	0.00349507
NIFK	GGGGTTGCACGGTTTCCGGCC	21	0.00352746
DDX21	GTGCGGGAGAAGTGCCCGGGC	21	0.00359277
FCF1	GGACGTTATCAGGCCACTTTT	21	0.00361597
C14orf166	GACGGCGGCCTTCGCCAATCG	21	0.00365521
WDR36	GCCCGCTGCGAATCGCGTTTC	21	0.00367099
SEH1L	GGCCGACCCCGGAAGGAAGGA	21	0.00367469
EIF3A	GAGTAGCTGATCGGGGCGCGC	21	0.0036775
CDC73	GTCCTCGCCTACGACAGCAGC	21	0.00367973
MTOR	GGACCCCACGTCCCAGACGGG	21	0.00368204
SEC61A1	GGGCCGGTCAGGGTTGGCCGG	21	0.00368805
GPN2	GTTATCTCCTTTTGCGCGACA	21	0.00369016
RPL10	GTCGCTTTTAtaaatggctgc	21	0.00371345
PSMA5	GGGGACGTCGGGTGGGAATTA	21	0.00375795
EIF4G2	GCTCCTCCCCGTCGAGCGACC	21	0.00377437
NOL6	GGAATTGGGGTGGGCTGGACT	21	0.00379275
PET112	GGGCGCCGCCATTGTAACTCC	21	0.00384798
CD3EAP	GGCTTTCGGGAATACATTTTT	21	0.00386454
TTI1	GAGGGGAAGGCTGCTGCACAA	21	0.00388917
XRN2	GTTCTCCAGCGCGCACGTGGG	21	0.00391563
PSMC4	GTAGTTTAAGTTACGGCTGAG	21	0.00397236
NCBP2	GGGCCTTCCCGTCTCGCGGCC	21	0.00397649
EBNA1BP2	GTCAGCCGAGCTCGTGGGGCT	21	0.0039807
PSMC2	GAGGAGCTGGATTCCCGCTCC	21	0.00398247
SPCS3	GGATCATGCTGTGAGTGAggc	21	0.00403908
EFTUD2	ggcccctttcgctttacggat	21	0.00406891
RPL38	GGCCGATATTTCGGGGGAGAG	21	0.00409739
RPL15	GGGGGTTGGGCTAGCTGTCCC	21	0.00411493
[truncated: 801 more rows]

## Sheet: CRISPRi_pos_select_efficient
efficient sgRNAs targeting positively selected genes upon CTx-DTA treatment in CRISPRi
gene	spacer	spacer length	phenotype score
B4GALNT1	GCGTCCCACTGGCAGCGCG	19	1.11973
DNAJC24	GTCGGCCAGAACTCCGGAC	19	1.08046
B3GALT4	GACCACGCCCGGGATGCGG	19	1.0435
B3GALT4	GATCCGTAAGAGCGAAGGG	19	1.03272
DNAJC24	GTCGTATAAAGCGCGGAGA	19	1.0078
CYP2A13	GGCGGCAGAGGAAGAGCAG	19	0.944328
SEL1L	GGGGGCGGATACTGACCCG	19	0.862429
DPH2	GCTACACGTGGGACTACCG	19	0.828025
B4GALNT1	GGGCGCGGAGGAAACTGCG	19	0.810183
DPH2	GGACTGCTTACTCCTCTTC	19	0.699528
ATP6V1G1	GAGCAAGGCAAGCGGCCTA	19	0.647281
SYVN1	GTTGCGGGCGTCGCAGGCA	19	0.616168
TRAPPC11	GGGATGTCACAGAACGCCG	19	0.590942
DPY30	GTGCGACAGCCGTCACTTA	19	0.530771
DPY30	GAACGAACGGCTTGGGCGC	19	0.519235
ATP6V1C1	GCCGGAGCTTAGGTCGGGA	19	0.513072
CDK12	GTGAGAAGCCGACGGCCCG	19	0.511322
WDR7	GGATAGGGCGGAACTACGG	19	0.485651
ATP6V1E1	GGAACCCGAGATCTGCGCA	19	0.47382
ATP6V1B2	GCTACCCGTGCCCACCGGT	19	0.472238
COG1	GGCGTAGGTAGATCGCCGG	19	0.464091
COG7	GGCGAACCCCAGAAACGCC	19	0.461573
ATP6V1A	GTGAGCGGCGACCGGTAAC	19	0.443901
UNC50	GAAGTCGGTTCCCGTGACG	19	0.43374
ATP6V1B2	GATATACCAAGGCGGCCCG	19	0.427466
COG3	GCGGCGGCAGAGAACTTGC	19	0.42153
UNC50	GTGACGCGGCGCGCCCCAA	19	0.420052
SLC35A2	GTCGGGATCGCTGGGAGTC	19	0.416679
COG8	GCGGCTCTCGGCGAGGTGG	19	0.406989
NIP7	GCGGCTCTCGGCGAGGTGG	19	0.406989
CSTF1	GATAGCGCAGCGGTCGGCT	19	0.391509
LSM6	GCGGTGCGGCTCACCTCGC	19	0.391091
COG7	GCGTGGCCATCCGCCTTCC	19	0.375366
CDK12	GTCACCAACCCCATGTCTT	19	0.360532
VPS29	GCTGCAGTTGCGGCGACCA	19	0.356256
ATP5F1	GGATCTCGGCTCACCGGAC	19	0.326469
COG3	GACGGCGCCGCTGACCGAC	19	0.315095
FUT4	GCGGAACGGAGGATAGCGT	19	0.314629
CDK12	GGCACAGTTATCAAACCTT	19	0.295044
ATP6V1C1	GCGATGGCTCTCCCCGGAT	19	0.289588
COG1	GGTGTCGGCCGCCTCGATC	19	0.28317
ATP6V1E1	GGGTCTTACGAAGCCGCGG	19	0.270774
CCNK	GTGTACCGGAGGTTAGCGG	19	0.267149
CSTF1	GACGTCAAGCTTGACGCAT	19	0.178163
RBBP5	GGATGAACCTCGAGTTGCT	19	0.158494
B4GALNT1	GCGCCCCGGCGCCTTCTAG	19	0.156572
NUDT21	GGCACGCCGGAAGTGAACC	19	0.134535
CANX	GCACCACAGCAACCGACGC	19	0.13417
CANX	GCGCGTCCTCGGGCCTGTG	19	0.13259
ATP6V1B2	GTGCCCACCGGTGGGCCGG	19	0.132454
CSTF3	GTGCGCACTGACCGTCGAT	19	0.119564
MAD2L2	GATTCCCGCCGGGAGGGATC	20	1.09312
DNAJC24	GTTCTGGCCGACAGCAGGCG	20	1.08757
DNAJC24	GGCGGAAGAAGAAGCCGGTC	20	1.07188
DPH1	GTATCCGGGGCAGCGGAGCA	20	1.01527
B3GALT4	GCAGCTGCGGACCGCGGTCG	20	0.993672
ST3GAL5	gcTCTCGCGCCCATTCAGCT	20	0.975164
DPH2	GATGTTTAGCAGCCCTGCCG	20	0.968907
B3GALT4	GCGGTCGAGGCATGCTGCGG	20	0.954995
DPH2	GTAGCGGAGAAACAGTAGTT	20	0.954582
DNAJC24	GTCTGATGTCGTATAAAGCG	20	0.876976
TM9SF2	GGCCCCCAGAAGGCTAGTTC	20	0.784978
TM9SF2	GGGGTGTCTCCTAGCGCAAC	20	0.712297
SYVN1	GCACCGGCGTCTGAGGTCTC	20	0.707653
SLC35A2	GTCTGCCCGAGCAGTCGCAT	20	0.642078
RBBP5	GCGTTGGGTACTGGAAAGGA	20	0.604746
DPY30	GCTCTTAAGAACGAACGGCT	20	0.580463
CYB5B	GCGGAAGCTAGCGGCAGCGA	20	0.573422
WDR7	GTCTCCCCAGTGATACTGCA	20	0.572029
DPH6	GGCGCTAGCGGCGGCTGGAA	20	0.564811
CSTF3	GGCGATTGGTGTTGGCGGTC	20	0.563603
CSTF3	GCGGTGGCGATTGGTGTTGG	20	0.552993
COG8	GACCGCGGCGACTATCCCAT	20	0.552178
NIP7	GACCGCGGCGACTATCCCAT	20	0.552178
COG6	GACGCGCAGCGCTATGGCAG	20	0.551136
DPY30	GGAGCTGGTGGCGCGGTGCA	20	0.539279
RBBP5	GGAGTCAGGCTGCAATCTTA	20	0.533534
ATP6V1A	GCTGTCACCCTGCACCGGCA	20	0.531211
ST3GAL5	GCCCCTCCTCCGCATCTGAG	20	0.517717
COG7	GGCCTGAGGCAGTTCCGCCA	20	0.513185
COG3	GGTATTGGAGCTGAAGGCGG	20	0.499988
DPH6	GCGGCTCTGATCAGGTAATG	20	0.490497
DPY30	GCAGGGCTCTTAAGAACGAA	20	0.489361
WDR7	GGCGGAACTACGGAGGATGC	20	0.484231
CSTF3	GAATTGGGTCTAGTGAACCC	20	0.480708
CCNK	GGCAAGGAGAGACGTCGCTG	20	0.480448
DPH6	GCCGCTAGCGCCGAAAGAGT	20	0.475115
ATP6V1B2	GGGAGCAAAGGGCTAGGCTA	20	0.460211
SLC35A2	GACTGTCTCACCCGCACTGG	20	0.460063
CANX	GCTCGCTCGCGCGGCAGCGG	20	0.459485
CDK12	GGGCCTGAGGACTGGCTCGG	20	0.455782
ATP6V1C1	GACAGCCTAGCGGACGCTAT	20	0.45559
COG3	GCCGCTGACCGACAGGCAGA	20	0.43984
CCNK	GTGAGTGACCCACCGACTGA	20	0.436342
VPS53	gacagagcggctgacggagc	20	0.430664
CSTF1	GGGACCGATCGATAGCGCAG	20	0.429665
SYVN1	GCGAAGTCTGGCCCGAGTTG	20	0.428778
ATP6V1A	GGCGACCGGTAACTGGCGAG	20	0.420197
COG3	GCTGCTGAAggccgcgaggg	20	0.418602
VPS53	GGGGAAACGGGAGTGCGGGA	20	0.415813
CSTF1	GGCTGGGACTGCCACAGGTC	20	0.411981
DPY30	GAGTGGGACAGTCCACGACT	20	0.411843
COG6	GACGCGGCTGGACAACGACA	20	0.408746
CTDSPL2	GGGGAGGAGATCCCGGCAGA	20	0.407872
VPS13B	GAGGGGACGCGGCGGTACTC	20	0.407706
RPRD1B	GAGGTCGGGTGGCCATCTTG	20	0.391069
ATP5F1	GATCTGAGCTCAGGAACGCG	20	0.390875
DPH6	GACGGAGACACCCACTCTTT	20	0.390741
CSTF1	GCTGTTGCTTCACCGATAAA	20	0.387117
RNF20	GGCGCCAGTTCAAAGAACTT	20	0.375479
VPS13B	GTACTCTGGCGTGTGAGCCG	20	0.37486
COG3	GTTGGAAGCTCCGGTTCTCC	20	0.366803
NUDT21	GTTATCTGCAATCCCCTCAG	20	0.364686
CCNK	GGCCAACCGCCGCTATCCAC	20	0.362483
RNF20	GCGTGGATAATTGCAGGCCC	20	0.350813
LSM6	GGTTCTGGTTCCCGCCGGCG	20	0.348733
SLC35A2	GAGGCGGAGGTCGGGATCGC	20	0.347932
VPS54	GGAGGCGGCGGCGATGCACT	20	0.343999
CCNK	GCGGCGCTGCCCTCAGTCGG	20	0.339743
NMNAT1	GTGCTACCGGAGATCACCAG	20	0.327336
VPS13B	GAAGCGAGGGCCTCGCGGGG	20	0.325573
CTDSPL2	GAGATCCCGGCAGACGGCCC	20	0.299079
UNC50	GCCGAGAGGTGGCGCGTCCG	20	0.295986
ATP6V1G1	GAGCAAGCGCAGATTGTGGG	20	0.29213
ATP6V1A	GACCGGTAACTGGCGAGTGG	20	0.287446
NUDT21	GGCTACTGCCCGCCATTAAC	20	0.279459
DPH5	GAGAATCGTAGGTAGTTCTC	20	0.274491
B3GALT4	GTGCCGCAGTCGGCCAGCCA	20	0.271928
FUT4	GTTCATCCCTGGGAAGGTAC	20	0.271404
VPS29	GGGGCCGGGATACGAGACCT	20	0.266523
DNAJC24	GTCGGAACAGTGACTTCCGG	20	0.264255
CDK12	GCTTGGTATCGAAGCACAAG	20	0.263102
SLC35A2	GGATGGTGGGTAGGCCGATC	20	0.257401
CYB5B	GTCCGGTTCAATGGCGACTG	20	0.248547
NUDT21	GGCGGGCAGTAGCCGCTGAG	20	0.246523
RPRD1B	GGCCGCCGCCTCCAAAGGGA	20	0.24613
FUT4	GATGAACCGGGCCTTCCCTC	20	0.243479
CSTF1	GTTCACTGCGCACGCTGAAA	20	0.241827
CTDSPL2	GGAACTTGAGATCGGAGTGG	20	0.236059
TRAPPC11	GAGCTAGCTCTTAACAATGC	20	0.220937
B3GALT4	GACCAGCGCACCCTGGGGGG	20	0.218652
CCNK	GTAGAGAGGGTCTGAGGCGC	20	0.213439
DPY30	GCCTGCGCAGAACCTCCCGG	20	0.209574
VPS54	GAGTTTCGGTCACAGCTGAC	20	0.208258
COG3	GGGACGGAATGCCCTGACCC	20	0.203158
COG8	GACTATCCCATCGGTAGCCA	20	0.202933
VPS53	GCCTGCCGGAAGTGCcggag	20	0.196146
RNF20	GATCACGCTTAGGGCCCAAC	20	0.192251
COG6	GTTGAGGCCGTTGGCAGCCC	20	0.190923
DPH6	GGTCTTCTAGCCcttaaact	20	0.184967
CTDSPL2	GGGGACTAGGAACTTGAGAT	20	0.183145
SLC35A2	GGCGGTTTCCGCGGGTGCAT	20	0.182687
CDK12	GCCCCCATGTCTCTCTGAAT	20	0.175332
ATP6V1C1	GACTTGTTCTGTGTTCGCTT	20	0.16476
RPRD1B	GATCCACTGCGCCGGTGTGC	20	0.161733
RBBP5	GCAAGTTGCTGAAGCCGGCC	20	0.156359
ATP5F1	GGCGCCCTGGGCCGGGGTAA	20	0.149209
ATP6V1A	GTAGCGGGAACGACCACACT	20	0.142681
COG7	GGCAGACGACTTCGACGTGA	20	0.136939
CYB5B	GGCCTTATGGGCCCTGGTTA	20	0.132806
RPRD1B	GGGTGGCCATCTTGTGGCGG	20	0.12053
CYB5B	GCTCTCAAGGAAAGTAGTCG	20	0.118738
RNF20	GTGTCTTCTCTCTCCAGGCG	20	0.116789
RPRD1B	GACCGCTCGAGCCTGCACAC	20	0.116688
RBBP5	GGAAGCCGCGGGGCCTTCTA	20	0.116122
SLC35A2	GAGCGAGAGCCGGGATCGTC	20	0.115864
CTDSPL2	GCGGCCTGCGTTGTGATTTC	20	0.114577
COG7	GTTACCCGTCCTGGCGTTTC	20	0.1122
UNC50	GCTGGTTCGGACGTGGGTCG	20	0.108047
RBBP5	GGAAGAAAGCGGAAGCCGCG	20	0.101352
CTDSPL2	GAACACAAGGCCTTAGTACT	20	0.100825
B4GALNT1	GCCGAAGCAGCCGCAACGAGC	21	1.11645
DNAJC24	GAAGAAGCCGGTCCGGAGTTC	21	1.06491
B3GALT4	GCATGGTGCGGCGTACTCCGA	21	1.05852
DPH2	GAGTAAGCAGTCCTGGCACCC	21	1.02411
SEL1L	GCAGGAAGAGCAGCGGCGAGG	21	0.99971
B4GALNT1	GGGATCCCCGGCTTTGCCCCG	21	0.957565
TM9SF2	GGTTCCTGGCCCGCGCCGGAG	21	0.862644
DPH2	GAATCACAGTCGGCCTTCAGC	21	0.850755
DPH5	GCAGTTGCTTCTGCGGAAAGG	21	0.839373
DPH2	GGGGGTAGGGGGAATCACAGT	21	0.767406
SEL1L	GATACTGACCCGAGGACGCCG	21	0.758599
ST3GAL5	GGGCCCCCGCGACGCCGAGGA	21	0.757156
B4GALNT1	GCGCGGGGAATGCGAGCGCCC	21	0.736193
B3GALT4	GCGGAGGTCTGAGCGCGCGAC	21	0.730751
FIP1L1	GGAGGAAGAGTGGCTCTATGG	21	0.727325
SYVN1	GGCGCTGGGTTCCTGGTGAGT	21	0.723393
TM9SF2	GCCGCCAGAGATAAAGGAAGC	21	0.713233
ST3GAL5	GGCTGCGCCACGTACCTCGGC	21	0.683159
SEL1L	GGCCCCGCCGGCTGTAGAGGC	21	0.677548
FIP1L1	GAGTCCTGTCCGGCCTGACTT	21	0.676719
B3GALT4	GGGAGCGCGCAACGCGGAAGC	21	0.611524
CSTF1	GTGCGCTCGGAGCGGTAGATT	21	0.608805
SEL1L	GGGAAGCCTGGGAAGGGGCGG	21	0.576466
ST3GAL5	GCGACTTGTCTCTTCCCGGGC	21	0.56796
FIP1L1	GCGTGCCCCCAGTCCCCGCGG	21	0.565874
CSTF3	GCCGAACATGTCTGGAGCAGT	21	0.555547
COG6	GCGCTATGGCAGAGGGCAGCG	21	0.547732
DPH1	GACAGGACCAACCCCCTTTAA	21	0.547613
CSTF3	GGCGGTGGCGATTGGTGTTGG	21	0.543517
CANX	GCGCCGCAGTAAAGAGAGAGG	21	0.539375
COG7	GACGACTTCGACGTGAAGGAG	21	0.533179
DPH6	GGGACGAGAGCCTGGCCTAGG	21	0.523397
CSTF1	GCAGTGAACGTGCGCTCGGAG	21	0.515408
VPS54	GCAGCCTCGGTGCGACGTGGA	21	0.50782
CDK12	GCACCCTTCTACATGAGGTGG	21	0.497395
WDR7	GATCCTGCTGGGATAATCCGT	21	0.486711
DPY30	GGAGCTGTTTGTGCTGGGAGC	21	0.473765
ATP6V1B2	GTGGGCCGGCGGTGGGAGCTC	21	0.472037
VPS54	GCTGTAGGTCGGGGTGAGAGT	21	0.466493
B4GALNT1	GTTTCCTCCGCGCCCACTAGA	21	0.464143
RPRD2	GCAGTAAGGCCTCCTCCTCGT	21	0.459929
ATP6V1G1	GCGGCAGCGATTCTGAGAGCA	21	0.459351
NIP7	GCTGTGGCCGTGGCTACCGAT	21	0.454075
UNC50	GGCGGGCTTCCCTTCCCTCAA	21	0.45033
COG1	GCAACCTCACCCGCGCTGAAG	21	0.444627
WDR7	GTGCAGGAACATCCCGCCCTG	21	0.443454
CDK12	GGCAGTGGAGTTGCGAGACAA	21	0.442572
CSTF1	GGCCGACCGCGGAGAGCACCC	21	0.440011
VPS54	GCCGCGGGGCACACCTACCTG	21	0.433704
CTDSPL2	GAGGACTGAGATTGGAAGCAG	21	0.433084
RPRD2	GCGCTGCTGCTCCTCTggcgg	21	0.42725
ATP6V1B2	GCACGCGCAGATATACCAAGG	21	0.423984
ATP6V1C1	GTACCGAGGCAGACAGCCTAG	21	0.422824
CSTF1	GGCTGTTGCTTCACCGATAAA	21	0.420296
RPRD1B	GAGGCAAGGAGAGTAGTTCCC	21	0.418046
CSTF1	GCCGACCGCGGAGAGCACCCT	21	0.417069
WDR7	GATGAAGCTGTGACAGGTAAG	21	0.414801
DPH1	GTCGCTGTCAGCCGGAGCCCA	21	0.414171
COG6	GGGGCGGGACGCGCAGCGCTA	21	0.412943
ATP6V1C1	GCTTGGGTAGAGGAAGCCGTG	21	0.411312
CDK12	GAGACATGGGGGCAAGAAGGA	21	0.408726
ATP6V1B2	GAGGAGACAAGATGGCGCTGC	21	0.405053
RPRD1B	GACTGCCAGGGGTGCGAGAAG	21	0.401056
CDK12	GTCCAGGAAGTGAGAAGCCGA	21	0.401022
RNF20	GCTGCGAGTTCTGTTCCCGCG	21	0.400231
ATP6V1G1	GGCTGTGTCAGCTGACCCAAG	21	0.399533
NMNAT1	GTCCGCCGGCCCGAGTGCTAC	21	0.399369
MAD2L2	GCTCTTACGCACCGGGAGGAG	21	0.399128
CSTF1	GCCGACCGCTGCGCTATCGAT	21	0.396304
RNF20	GCCTTGTCTCCGCCGCGGGTC	21	0.39437
VPS13B	GAAGGGCTACTGCGGCCGAAG	21	0.390806
RBBP5	GCTGCGTTTTAGAGAAGCGTT	21	0.390067
ATP6V1A	GACAGCCTCTGGGTCCTCGGT	21	0.388041
VPS29	GACTGAGCGGAGCCCGGTGAC	21	0.387392
RNF20	GAGGCCTGGCACAGTCCTGTT	21	0.384879
RPRD2	GCAGCAGCGCTTGTGCAAACC	21	0.381251
B3GALT4	GGGGACTTAACCGACCACGCC	21	0.379027
WDR7	GCGGTCTGATAGGCTACATCG	21	0.378985
ATP6V1A	GTAGCGGGAACGACCACACTT	21	0.378955
VPS29	GGAAAGGCCCAGAAGAGGTCT	21	0.375395
RPRD2	GCACAAGCGCTGCTGCTCCTC	21	0.374796
VPS53	GAGGGGAAACGGGAGTGCGGG	21	0.374262
NUDT21	GGTTATCTGCAATCCCCTCAG	21	0.370205
FUT4	GTAGCGGATGAGGCGCTTGTG	21	0.368658
RPRD1B	GCGGCAGGGTGAGAGGTCGGG	21	0.36828
VPS29	GTCTCGTATCCCGGCCCCAAG	21	0.365498
DPY30	GGTGCTCCCGCGCCCAGGTGG	21	0.361265
VPS13B	GACGTAGTGACCAGAAGAGAG	21	0.358226
ATP5F1	GGCTGGGAGGGTCAGTCTCCG	21	0.357793
NMNAT1	GTCCGGGCCGCTGGTGATCTC	21	0.357782
CTDSPL2	GACAGGAGCGGCTCCGCACAG	21	0.356755
LSM6	GTGCCCCTGCCTCGGCGCTTT	21	0.356053
COG6	GCGTCTGTCAGGGACCCACCG	21	0.355081
FIP1L1	GCTCGACCTCGCCGGCCGACA	21	0.353955
DPH6	GAAGACCAGAGAGCGACAGAC	21	0.350286
B4GALNT1	GGGCGCGGAGCAAACGCGGGA	21	0.341751
VPS53	gctgacggagcCGGGCTCACC	21	0.339596
VPS53	GGCCGGGTGGCGGAATGATGG	21	0.336925
ATP5F1	GACAGCTCGGTGACGCGACCC	21	0.334931
ATP6V1C1	GAGCTCCGGTCGCTGCCTGGG	21	0.333419
VPS53	GTGCcggagcggctgacagag	21	0.332503
CANX	GGCCGAGGCCTCTTGGTTCTG	21	0.327429
FUT4	GAGAATCAAGAGTAGCGGATG	21	0.326943
SLC35A2	GATGCCAACATGGCAGCGGTT	21	0.324059
CANX	GGTTGGGTTGGAACGCCCCGA	21	0.323411
FUT4	GGACCCGGCGCCGCGGAACGG	21	0.321786
FUT4	GCCCGAACCCTCGCCTTCCAG	21	0.320948
CANX	GGCAAGGTGTGCGGGCGGGAA	21	0.319836
ATP6V1G1	GCGAGTCGAAGAAAGACCGCT	21	0.316233
CSTF3	GGGACAGGGTATATAGAAGAG	21	0.315902
ATP6V1A	GTGCAGAGACTGTACCGACCG	21	0.304091
ATP6V1G1	GCCTAATCTACCCACCACCTG	21	0.303197
VPS54	gcccgcTGGCCAGTCGGCCCG	21	0.301851
B4GALNT1	GGTTGAGATGCCAGTGTTTGG	21	0.301717
VPS29	GGATGGTGAGGGCTGCAGTTG	21	0.299746
DPH6	GCCCGCATGTGCCTCGGCCCC	21	0.299383
RNF20	GTTCTGCCTTGTCTCCGCCGC	21	0.298961
DPH5	GCAAGTCACAAGGAGGGGTTT	21	0.297029
VPS29	GCTGGCCTAGGTCTCGTATCC	21	0.290672
TRAPPC11	GCCGCCAGCCGGGAGAAGACG	21	0.289863
CSTF1	GCTCGGAGCGGTAGATTGGGC	21	0.28889
ATP6V1E1	GAACCCGCGGTTATAAAGTAA	21	0.288235
CSTF3	GAATTGGGTCTAGTGAACCCG	21	0.285865
COG7	GACTTCCGGAAGAAGAACGGC	21	0.28232
ATP6V1C1	GCCTGACCAGGACTCCCCATC	21	0.281042
CCNK	GGCGACGCGGGGTTGTGGGGC	21	0.273515
ATP6V1G1	GGGCGTGCGTATAGTCGCGGA	21	0.2733
ATP5F1	GTCAGGATAACATGCAGGGCG	21	0.272972
TM9SF2	GTGAGAACGGTCGCAGGCACC	21	0.271643
B4GALNT1	GCCTGCTCGTTCTGAGCTTGT	21	0.264355
FUT4	GTCCGCCTTCCGTCTGTTCTA	21	0.256632
NUDT21	GCCCCGGGGGGTCACTCAGTT	21	0.256607
DPH5	GAAAAACCGTCAGTAACACCG	21	0.252821
ATP5F1	GGAGGCTGCGCGGTACCGGTC	21	0.247945
ATP6V1E1	GAAGCCGCGGCGGCAGTCCCG	21	0.245641
VPS13B	GCGGGGTGGCTGGGTTGGTGA	21	0.243991
DNAJC24	GGGAAGAGGTTGCCTGATTTC	21	0.238022
DPH1	GCCGCCGCCGTTAAAGGGGGT	21	0.226709
UNC50	GCGGTAGGGCCGAGGACTACG	21	0.223842
TRAPPC11	GCCTCAGCTGCAGCGGGCCCG	21	0.212986
TRAPPC11	GTACAGGGAAGTCTCGCCTGT	21	0.204912
CYB5B	GAATCTCAGTTAGCGGTGGAG	21	0.202287
VPS29	GGCCCTGACGCCGAGGCCTCC	21	0.192072
VPS53	GTAAGCGTTCCGCCCCTCAGG	21	0.190028
CSTF3	GTAATCAGCTGAGGCCATGTC	21	0.185648
FUT4	GTTCTAGGGCCTGCTCCTGCG	21	0.18538
CANX	GCGGCGCCGGCTCACACAGCG	21	0.179472
CTDSPL2	GATCTCCTCCCCTTCTAAACC	21	0.177357
CYB5B	GCTAGCGGCAGCGATGGGAAA	21	0.175213
ATP5F1	GAGCTCCCTTACCCCGGCCCA	21	0.171088
SLC35A2	GGATAAGGCGGGTCTAGTGAC	21	0.17011
COG6	GGCCAGGGGCGGCGTCTGTCA	21	0.168537
CYB5B	GGCTCTCAAGGAAAGTAGTCG	21	0.16137
COG7	GAGTGGATCAATGCGGCCTTC	21	0.158677
CYB5B	GAGGCAGTATGTCCGGTTCAA	21	0.157713
CDK12	GTGCCCAGGGATGCTGCTTCG	21	0.157561
CYB5B	GCGGTGGAGAGGCAGTATGTC	21	0.153701
CTDSPL2	GCGCCTCGTACGTCCACTGTG	21	0.149481
VPS53	GCTCGCGGCGGGGGTCGGCAG	21	0.14897
SYVN1	GGAGACCTCAAGGGGAAGGTT	21	0.148505
CYB5B	GGAACTGTGGCTTGTGATCCA	21	0.145718
VPS13B	GGGACACACCCGGAAGTGGCG	21	0.143619
VPS54	GCACACCTACCTGCGGGTCCC	21	0.141849
DPH6	GCGCGTGCGTGCGGCGAGCGC	21	0.141488
COG3	GGAATGCCCTGACCCCGGAAA	21	0.141308
UNC50	GAAGCCCGCCCGGTGGCGGCT	21	0.140266
LSM6	GGCTGCGCCCGGCCCCGTCGT	21	0.138933
RBBP5	GGCGCAAGCTCCGAAGACTTT	21	0.133862
CYB5B	GCGGAAGCTAGCGGCAGCGAT	21	0.131126
COG8	GTTCGGAGTCAGCGCCCCTTG	21	0.129993
NUDT21	GCTGGCGAGCTCCGGCGCTGA	21	0.129374
NUDT21	GCAGATAACCGCTTCCCGCAC	21	0.126565
SLC35A2	GGTGGTTCCACCGCGGCGCCC	21	0.124808
ATP6V1E1	GAGGTGAGAGAAATCGGCAAA	21	0.12004
VPS29	GCGTTGTTGGGAGCCGTGGGG	21	0.114581
FUT4	GCCGGGGGAACGTGCGAGCAG	21	0.109579
CANX	GCAGCGAACGCGGGCCCCTAC	21	0.103267
ATP6V1A	GAACGACCACACTTGGGGGAG	21	0.103151
NMNAT1	GTTTCTCAGGGGCTCCTTGCG	21	0.101926
CCNK	GCCGCCCACCTCCCGCGTATC	21	0.101086

## Sheet: CRISPRi_pos_select_inefficient
inefficient sgRNAs targeting positively selected genes upon CTx-DTA treatment in CRISPRi
gene	spacer	spacer length	phenotype score
CYP2A13	GATGTCAGTCTGGCGGCAG	19	0.0931421
CYB5B	GTCGCGGAATCTCAGTTAG	19	0.0922081
CANX	GGGCCGGGCTTCGTGCGGT	19	0.08546
CTDSPL2	GCTGTGTAGTGGTCGCAGG	19	0.071458
CTDSPL2	GGCCCTTGCTCATCCTGAT	19	0.0469454
CYP2A13	GCCTTAGGACACCTTCATG	19	0.0453119
CTDSPL2	GAGAGTTTCTTCCGGCGTA	19	0.0350536
COG7	GCACCGAGGCTAGCCTCCG	19	0.0309322
CYP2A13	GGTCTTGATGTCAGTCTGG	19	0.0277706
VPS53	gccgctctgtcagccgctc	19	0.0223608
COG8	GGCGCGAGCGGCCCGATGT	19	0.0133824
NIP7	GGCGCGAGCGGCCCGATGT	19	0.0133824
VPS53	GGAACGCTTACCTGCTCGA	19	0.013378
RBBP5	GGTTCATCCCTGCGGACTG	19	0.0119028
SLC35A2	GAAAGCGCGATCAGTGAAG	19	0.00264868
CCNK	GAACTTTGCGGGCGACGCG	19	-0.00148192
NUDT21	GGCCCACTGGAGCTCGGTC	19	-0.00973053
DPH1	GATCGCCGATCGGCCAGCG	19	-0.0128216
TRAPPC11	GTTTTGCAATCCCATCGAC	19	-0.0136202
ATP6V1A	GAGCTCGACGTCATGTGAC	19	-0.0496986
SLC35A2	GTGGTTTTTCTGTTGCCGA	19	-0.196816
LSM6	GCCTCGGCGCTTTCGGTTT	19	-0.235842
DPH5	GCGGGTAATTGGCTGCTCCT	20	0.0949948
CSTF3	GGGTAACTTTACTGATTTGG	20	0.0929657
ATP6V1A	GTGGTCGTTCCCGCTACTTG	20	0.0864471
LSM6	GCTGCGCCCGGCCCCGTCGT	20	0.0860418
COG6	GGTCGCAGTGTCTGCGACCG	20	0.0843402
SYVN1	GCTGAGGGGCGTGCCGACTC	20	0.0804554
LSM6	GTGAGGGTTCTGGTTCCCGC	20	0.0800055
CTDSPL2	GCAGTTCCGTTAGGAGCGGG	20	0.0790208
SEL1L	GGGCCTTCAGCCCGAGGGGG	20	0.0714892
TRAPPC11	GTCCGGGCCCGGAGACCCGC	20	0.0712668
ATP6V1G1	GCCCGCACCCCGCAGTTTTT	20	0.0484993
COG3	GAAACGGTTCCGCAGTGTGG	20	0.0456607
DPH1	gcttgagcgggggcaccggc	20	0.0438509
LSM6	GAACACTGGGGCACCGAACC	20	0.0434179
CANX	GCCCGACCCCTCAGCCGCAG	20	0.0431634
RPRD2	GTTGGATCGAAAATTCCAGT	20	0.0407857
RPRD1B	GCCCTTTGACCTCGCTCTCG	20	0.0339326
CYB5B	GAACCGTCTCAAGGCCTTAT	20	0.032536
TRAPPC11	GCTCTTAACAATGCTGGTTT	20	0.0319587
CTDSPL2	GGAGTAGGGAGTAAAGCGTT	20	0.0297629
LSM6	GCAGCCCCGGAAAGGGCCTG	20	0.0289762
ATP6V1C1	GCTCATGCTTCGGCCTGACC	20	0.023677
ST3GAL5	ggcgcggggtaccgggctgg	20	0.0225536
CYP2A13	GCCACAAAGCCCCAGCCAAC	20	0.0218506
ATP6V1G1	GGCAGCCGAGAAGGTGTCCG	20	0.0206832
MAD2L2	GCGCCGTGAACGTCACCGAG	20	0.0191413
MAD2L2	GGCGGCGGCGCCTAGGCCTC	20	0.0176799
DPH1	GATCTCAGGGGGGATCTGAT	20	0.0172739
DPH1	GGTTCTTCAGGATCTCAGGG	20	0.0167835
NUDT21	GCTCGCAGACCGGCTGGCCC	20	0.0144172
VPS53	GCTCACGCCCGAGGTGCAGC	20	0.0139115
MAD2L2	GACATGCGGAAAGCGAAGCG	20	0.0118256
CSTF3	GCGCACGTTGTAATCAGCTG	20	0.00852686
ATP6V1B2	GATGGCGCTGCGGGCGATGC	20	0.00604915
COG1	GCAGCGGCGCATCTGGCCGA	20	0.00198263
VPS53	gccgctccgGCACTTCCGGC	20	0.000808496
CTDSPL2	GGGGGATATTTGTACATTAG	20	-0.00287513
CSTF1	GCGTCAAGCTTGACGTCAAG	20	-0.0028987
CANX	GCCGTTTGCCCCGTCAGCGA	20	-0.00341382
TRAPPC11	GAAAGTGCTTCCTGTGCCGG	20	-0.00546412
NIP7	GCGCCCCTTGTGGTCCGGAA	20	-0.00586852
UNC50	GTGGTGGGCTGGTTCGGACG	20	-0.0058734
TM9SF2	GCGCTCATGATAGTTGTTTC	20	-0.00717123
CYP2A13	GTGGGGGCTGCCCAGTTGGC	20	-0.00741223
MAD2L2	GACTCCGCCCCCTGCTACGC	20	-0.00891653
CSTF1	GCCGTTGGCTCCACCACTTC	20	-0.0101676
NMNAT1	GACCGAGATGTTCCACTCGC	20	-0.0102458
DPH1	ggcaccggcaggccctgaaa	20	-0.0137799
COG8	GGTCCCGGAACAGCGACGCC	20	-0.0140386
NIP7	GGTCCCGGAACAGCGACGCC	20	-0.0140386
COG1	GTAACAAACATGGCCCCCGG	20	-0.0156127
MAD2L2	GGTTTGGGCCGTGCGGGAAT	20	-0.0158261
MAD2L2	ggccgggcccgATCTCGGGC	20	-0.0163933
MAD2L2	GGAGGCGCGATCGGTCCGGT	20	-0.0191059
WDR7	GTTCCTGCACCGTGGAGGTC	20	-0.0193737
DPH5	GATGTCCTCGGTGTTACTGA	20	-0.0204822
RNF20	GGCAGAACTTCCGGGAGGCG	20	-0.0273896
COG6	GGCCTCAACAATGGGGCAGG	20	-0.0284875
LSM6	GGCTCCGGGAAGGGACCGCT	20	-0.0339252
SLC35A2	GGCAGCGGAAGTGACGAACG	20	-0.0347191
ST3GAL5	GGTCTGACGTCACGAGGACG	20	-0.0351188
NUDT21	GCCGAACTGAGTGACCCCCC	20	-0.0415807
COG1	GGCCATGTTTGTTACCCGAg	20	-0.0502356
NIP7	GCGCTAGCGAGACGAACTAT	20	-0.0513119
DNAJC24	GGCCAGAAACGCGAACACGT	20	-0.0518463
ATP6V1E1	GGGCGTCGCTCTCTTCCCAT	20	-0.0759763
ST3GAL5	GCCTTCGTCCGCATACTAATG	21	0.0961503
CANX	GGTTCTGCGGCACGTGACGGT	21	0.0953628
NUDT21	GCAGGGTAGACTTTCCCCGTG	21	0.0931906
TM9SF2	GTAGAAAGCGCCGCTCCGGCG	21	0.0917718
CANX	GGGTTCTGCTCACGCCCGTAG	21	0.090094
VPS13B	GAGCACCAAGTGGGACACACC	21	0.0890827
NUDT21	GCCGGTCTGCGAGCGATTGGG	21	0.0886412
CTDSPL2	GAAACTCTCTAGTCTGAATCC	21	0.0874377
CANX	GCGGAGCAGTGCACGCCAATC	21	0.0842349
FIP1L1	GGTGGATGCGCATGGTGGGCG	21	0.0827707
SLC35A2	GAGTCTAGGAGACAAGATCGG	21	0.0807247
NUDT21	GCCTCTGGCGGCAGGAAGTAG	21	0.0714308
CDK12	gcccaccAAAGCGCCCCGGGA	21	0.0687502
TM9SF2	GGTCCGCTTCGGTTTCTGTTG	21	0.0652636
ATP6V1E1	GGTTCCTTTACTTTATAACCG	21	0.0652159
RBBP5	GACCGGGCGGCCACAGTCCGC	21	0.0621633
MAD2L2	ggCTCGACTGCCCCCAGCCGA	21	0.0606226
NMNAT1	GCTTCTGACCTTCGGAACAGA	21	0.053855
SEL1L	GGGCGGGGATTGGCTGCGCGC	21	0.0527226
DPH2	GGGACCTCCCTGGGACAGCTT	21	0.0517238
SLC35A2	GCTCAATGTATGAATAGCCCC	21	0.0509783
TM9SF2	GCTCCTGCTGGGGGCGGTTCC	21	0.05083
MAD2L2	GCGAGGCAGGCCCACTCCTCC	21	0.0494555
CANX	GTCGGGCGTGGCCGGCGACTG	21	0.048231
COG1	GCATGGAGCGGAGGAGATCCG	21	0.0476894
COG6	GACAAGGTAACCGGGGCTGGC	21	0.0465429
COG7	GAGTTGGCTCCGGGCGGCAAC	21	0.0447365
FIP1L1	GCGGGAGACCGCCGCGGGGAC	21	0.0443868
TM9SF2	GGGGCGGTTCCTGGCCCGCGC	21	0.0438489
DPH1	GCGGGTATCCCCCGCCCCCGC	21	0.0423852
CANX	GGAGTCCGACGATCGGCCATC	21	0.0410402
VPS29	GGTTAAGTGGGCGGGTCGCCG	21	0.040446
FIP1L1	GGCGCGAGAGGCCAGGGACGC	21	0.039272
CANX	GGCGCCGGCTGTGGCTACTCA	21	0.0378166
ATP6V1C1	GGTCGCTGCCTGGGAGGGACG	21	0.0376893
NMNAT1	GATGTTCCACTCGCTGGCGTC	21	0.0364719
SEL1L	GGATTGGCTGCGCGCTGGGTC	21	0.0360807
CCNK	GCCATCTTGTATATGGAATGT	21	0.0348241
CANX	GGGGCCCGCGTTCGCTGCAAC	21	0.0342319
DPH2	GACTACCGGGGAGGTTACTTC	21	0.0334011
CTDSPL2	GCAGCGGCGGCGTCTGGACGA	21	0.0323302
CYP2A13	GGCTGCTTCTGGTGACCTTGC	21	0.0317514
VPS53	GCTCGATGGCCAGCTGCACCT	21	0.0314958
SYVN1	GCGGCCGCTTTGCTCAAGCCT	21	0.0314124
DPH1	GGGGCCCCGCCCCGAGATGCG	21	0.0282003
CYB5B	GAACTGAGCCACTCCCTTCAT	21	0.0275378
SLC35A2	GCGATCAGTGAAGCGGACGAA	21	0.0268611
LSM6	GAGCCCCAGCCTGTTCACCGC	21	0.0261016
CDK12	GGGAACTTTTTTCCCTTCTTC	21	0.0252607
SEL1L	GGGAGAACGGGGTCCCGAGCC	21	0.0242548
DPH1	GCCCTCCAGACCTCGCATCTC	21	0.0229882
DPH1	GGGGGGATCTGATTGGCCACG	21	0.0221923
UNC50	GACGTGGGTCGAGGCTGTAGC	21	0.0201603
ATP5F1	GTCTCCGGGGAGGGGCGCCCT	21	0.0197198
FIP1L1	GCCCCGAGCGCAACTTAAACG	21	0.0196653
SYVN1	GCCCGAGTTGTGGTTGGGGTC	21	0.0187618
RPRD1B	GAACCCTTTTTCCCGCTCCCT	21	0.0183635
SYVN1	GACAGGCCGAAAGCGTGCGGC	21	0.0177782
CDK12	gggtTGCTTTTTGGAGTGCTG	21	0.0176725
COG8	GGGCTCCTGGCGTCGCTGTTC	21	0.0176129
NIP7	GGGCTCCTGGCGTCGCTGTTC	21	0.0176129
ST3GAL5	GCAGCCCCCTCCTCGGCGTCG	21	0.0173983
ATP6V1G1	GCTGTGCGGTCACGTGACAAC	21	0.0166215
ATP6V1A	GAAGTCCTCAGCTGCACAGGT	21	0.0165482
SLC35A2	GTCCCCGGCCTCCCGATCCGA	21	0.0164743
UNC50	GCTTGCGGCCTGACGTCGCTG	21	0.0159231
NIP7	GTGACGTTGTTGCTGGGAAGA	21	0.0156631
ATP6V1E1	GGCGGGCTCCAGCCCACTCCC	21	0.0145803
DPH1	GTCGGGCCCCTCGGGGCCGCG	21	0.0126328
MAD2L2	GCCCAGCAGCCGTGCGGGCAC	21	0.0120654
CTDSPL2	GAGCGTTGAAGTTCCTTACGC	21	0.0111884
ATP6V1A	GCTCGACGTCATGTGACTGGT	21	0.00977996
SLC35A2	GTTTTTCTGTTGCCGAGGGGA	21	0.0071741
DPH5	GCGCTTTTGCAGTTGCTTCTG	21	0.0069396
ST3GAL5	gcgggtgggggcgcggggtac	21	0.00647768
SEL1L	GCTCTGGGCCTTCAGCCCGAG	21	0.00531605
VPS13B	GGACGGGAGGTCTTCTAGCTT	21	0.00416715
CYB5B	GGAACCGTCTCAAGGCCTTAT	21	0.00267762
NUDT21	GAACCCGGAGCCTCTGGCGGC	21	0.000959873
ATP6V1A	GAACGGCGACTTTTCTGCCTG	21	-0.00014928
DPH1	GAATGGATATAAGGCCTGAGT	21	-0.00119573
COG1	GGGCCGAGATCGAGCACAAGA	21	-0.00139442
VPS13B	GTGGCAGATCCGGCTGGGTTC	21	-0.00150051
DPH5	GTAACAAGAGGCAAAACTGGT	21	-0.00354416
TRAPPC11	GGGCCTGGGTGAGTCCGGGCC	21	-0.00622406
RNF20	GTTTTGGGGCCGTCAGTCTCC	21	-0.00623764
SLC35A2	gtgCACATTGTCAGTGTGTTG	21	-0.00710243
DNAJC24	GCCTCCTCAAGCTCGGGACTT	21	-0.00927804
DPH1	GGGTTGGTCCTGTCCCTAACT	21	-0.00930617
MAD2L2	GGGTTGAGCGGGAGGCGCGAT	21	-0.00992447
FIP1L1	GAAGCGGCGGCGCGAGAGGCC	21	-0.0101789
VPS53	GCGGAACGCTTACCTGCTCGA	21	-0.0156437
DPH1	GATTGGCCACGCGGCCCCGAG	21	-0.0158142
COG8	GACCGCTTCCCCGAGGCCCAG	21	-0.0164023
ATP5F1	GTGAGCCGAGATCCCGGGCCT	21	-0.0164475
COG1	GCCCCCTCCGCCATCTTCGTT	21	-0.0166562
NMNAT1	GGTAAAATAGCTTCTGACCTT	21	-0.0169356
CTDSPL2	GTAGTGGTCGCAGGGGGAGTA	21	-0.0171732
ATP6V1B2	GGCGTCGCTGCTGGGCCAGTC	21	-0.0200488
CYP2A13	GATAGATGGTGATGGCTGGGG	21	-0.0217378
MAD2L2	GAACTCAGAGCGCAGCTGGCG	21	-0.0221517
DPH1	GTGAGCCTGTGATCATTGAGC	21	-0.0236018
NMNAT1	GCAAGCTCATATTCAGGTTTG	21	-0.025985
CSTF1	GGCCGTTGGCTCCACCACTTC	21	-0.02723
CANX	GCATCGCGCGCCCTTCGCTGA	21	-0.0273477
MAD2L2	GCCCAGAACTCAGAGCGCAGC	21	-0.027877
VPS54	GCGATGCACTAGGCCTCGCTC	21	-0.0294638
VPS54	gcggccgTGGAGCAGCAGCCT	21	-0.0306712
CYP2A13	GGGATGATAGATGGTGATGGC	21	-0.0308755
DPH1	gatccctattccatctcaATC	21	-0.0332693
MAD2L2	GAGGCCCGGTTTGGGCCGTGC	21	-0.0337421
SYVN1	GTGCCGACTCCGGAGACCTCA	21	-0.0352645
CYP2A13	GAGTCTTAGGAAAGGGAGTCT	21	-0.0358318
FIP1L1	GGGCCAGGCGGGAGACCGCCG	21	-0.0387222
NMNAT1	GTCCTAGATATAGGGGAGTCC	21	-0.039317
WDR7	GTCACAAACCCGCTCTAGCCG	21	-0.0433365
MAD2L2	GCCCAGGGCGCGTGGGACGGG	21	-0.043905
MAD2L2	GCCGAGGCGGCTCTTACGCAC	21	-0.0449337
ATP6V1B2	GATACTCACTGAGGCGAGGCT	21	-0.0495345
DPH5	GCCTCTTCTCTTGTGCTACTT	21	-0.0497238
LSM6	GGTTTTGGCTGGGATCATCCG	21	-0.0498526
VPS53	GCTCACCAGGTCGCTGCCGCG	21	-0.0514001
LSM6	GAACACTGGGGCACCGAACCT	21	-0.0526472
MAD2L2	GGCGGTTCCGCATGCGGGGGC	21	-0.0530076
DPH2	GAGGTTACTTCCGGGTTTTAG	21	-0.0582378
VPS53	gacagagcggctgacggagcC	21	-0.0598204
ATP6V1E1	GAGCCCGCCTAGGGAAGGCCG	21	-0.0626926
VPS54	GTGACCGAAACTCGGTCCGTT	21	-0.0647272
NIP7	GCGAGACGAACTATTGGTACG	21	-0.0982831
COG1	GGAAGCGCTTCCGCCCCGCCG	21	-0.103636
LSM6	GGCAGCCCCGGAAAGGGCCTG	21	-0.160618
LSM6	GCTGTGGAGCGGCGGCTGCAG	21	-0.228663

## Sheet: CRISPRa_efficient
efficient sgRNAs targeting negatively selected genes in CRISPRa
gene	spacer	spacer length	phenotype score
IGDCC3	GTCTGGGGAACAAAAGAGC	19	-0.299021
GKAP1	GGAGGGTGGAGGGAAGCCC	19	-0.29353
C3orf72	GAAGCACGACCCGCGTCTC	19	-0.27557
HOXC13	GCCGACGCAAAGGGGTGTA	19	-0.260653
AHR	GGAATGGAATCCAGATggg	19	-0.255247
CDKN1C	GggagTTAAAGGGCGCTGC	19	-0.183318
FOXO4	GCCACTCTTACTAGGGTCC	19	-0.177152
CDKN1C	GGGTGTGCGCGCGGCCAAT	19	-0.168566
DUSP9	GgcgggccggTGAGCCAAC	19	-0.157817
KIAA1804	Gtgcggaatggagccggag	19	-0.145247
CEBPE	GGGTCTAGGGAGTAGTGAT	19	-0.142072
IKZF3	GGGTTTGACATTCGAAAGG	19	-0.121826
FOXO4	GTGGCACGACTGCAGAACT	19	-0.120295
C3orf72	GGAGTCCGCCCAACAGAGA	19	-0.0886605
PRDM1	GAAATACACATGCGAAGAG	19	-0.0743671
CDKN1C	GGCCGCGCGCACACCCACcg	20	-0.41928
TP73	GTCGGGCACAGAGTCGGCAC	20	-0.408705
C3orf72	GCGAGGCTCCTGGCGCACTA	20	-0.407624
NIT1	GCGAAGATGGCGGAGAACAG	20	-0.393724
CDKN1C	Gctacagcgcgctcgccccg	20	-0.387062
PLK4	GTTCTAGACTTCGGGGCCAA	20	-0.366957
RHOXF2	GCATGCGTTGTCCTGTAGAC	20	-0.350433
RHOXF2B	GCATGCGTTGTCCTGTAGAC	20	-0.350433
IKZF3	GCCGGTGCGCGGGGTTACAG	20	-0.340889
RNF182	GGCAAccgccggggcccccc	20	-0.302008
KIF18B	GTTTCCCAGGCGGTGTCTCC	20	-0.2921
HES7	GATTCTGCCCCTCTAGGACC	20	-0.281834
NIN	GGCCCGCGCGGCTCAGGCAG	20	-0.276577
FOXO4	GagggCAGCAATCCGGGTGG	20	-0.267948
HNF4A	GTTAATCGGTCCCCCGCCGG	20	-0.267455
SNAI1	GCGGGGACTCCTCCGAGGCG	20	-0.258205
HNF4A	GAGCCTCCACCCCTTCACAG	20	-0.256778
PRDM1	GCGGCTGTGCTAGCAATCTG	20	-0.252316
HNF4A	GCCCCGCCCAGCCTATCCAC	20	-0.243034
ATL1	GACACGTTCCCAGCCAGCAT	20	-0.240126
RHOXF2B	Ggaggggtaagtggtgtagt	20	-0.229526
RHOXF2B	Gtaagtggtgtagtagggtg	20	-0.228009
HOXA13	GCGCGGGTCTGGGCCCCACT	20	-0.220994
TGFBR2	GGCAGATGTTCTGATCTACT	20	-0.218623
FOXO4	GTTGATAGGGGAATCGGTGC	20	-0.215005
OTOP2	GACAGGGTGATTTACAGCTG	20	-0.214821
IKZF3	GCGTCGGCGCAGACTGAAAA	20	-0.204548
COL2A1	GCCGCAGCCCCGGGTTTGGG	20	-0.197617
IER5L	GCTGCAGACTGCGGCCCCGG	20	-0.194735
TGFBR2	GTCGGCCAAAGCTCTCGGAG	20	-0.185598
HNF4A	GGGTGCTAATTACAACTGCT	20	-0.180139
TP73	GCTCTGCCGAAGATCGCGGT	20	-0.174329
HOXA13	GGGCCCAGACCCGCGCAACC	20	-0.173672
IKZF3	GCGGCGGCTTTAAAGGACGC	20	-0.167222
FOXA1	GCTCGCACCTACAAAGCCCG	20	-0.166202
ZBTB10	GGGCGCGGGTAGGTGCGTGT	20	-0.163535
CDKN1A	GAGCCTGGCCGAGTTCCAGC	20	-0.16323
COL2A1	GCCACTCGGCGCACTAGGGG	20	-0.161707
OTOP2	GAATTTAGGGAAGAGCCCGC	20	-0.143305
IER5L	GGCAGCCGCGGGCTTCAACG	20	-0.125601
CDKN1A	GGGTCAGCGGTGAGCCAGAA	20	-0.120026
PLK4	GAGAGTTTAGTTCGGGCGGG	20	-0.119992
COL1A1	GGAACCCTGCCCCTCGGAGA	20	-0.113085
NIT1	GTCGCGCCGGCAAGAGCAGC	20	-0.1121
HOXC13	GTAACTGGGCGCCTCCGCCT	20	-0.101096
PTPN1	GGAGGTGCATGACTACTTTA	20	-0.100829
CDKN1A	GTGCCCTCCTGCAGCACGCG	20	-0.099887
C3orf72	GGCCGGAGCCCCTCTCTGTT	20	-0.0991049
COL1A1	GAATGGCGTGGGCTAACCAG	20	-0.0875591
TGFBR2	Gtgctcgcgactcaatagat	20	-0.0830882
IGDCC3	GGACCCACTCCCCAGTCCGC	20	-0.0797145
IKZF3	GGGGTTACAGCGGCGCTGGC	20	-0.0771434
PLXNA3	GcgccACACCCCCTCGGGCC	20	-0.0746909
FOXA1	GTGAGCGGGCTGCCTCTGCG	20	-0.0702852
COL1A1	GTGGGCTAACCAGTGGGTAG	20	-0.0651159
HOXA13	GcACCATTCACCCGGGGGAG	20	-0.0617371
NIN	GTTAGAAACGCCGGGGCTCC	20	-0.0582869
CDKN1A	GGAACCTCGCGTGCTGCAGG	20	-0.0581938
FOXA1	GTGCGAGCGTCTTTGTGCGG	20	-0.0579364
C3orf72	GGCCTCCAGCAAGCAAGCGC	20	-0.0553924
C3orf72	GCGAAGGCGCCTGACGCAAG	20	-0.0502427
HSPD1	GCCGGACTGCGAGTCTCTTTG	21	-0.699748
CEBPA	GTGCAGCCTCGGGATACTCCT	21	-0.679453
TGFBR2	GGAACTCCTGAGTGGTGTGGG	21	-0.608252
RIPK2	GCGGAGGCCGAGGGCTGGGAC	21	-0.602257
POU4F3	GCAGTTCGAGCTGGGACAGGA	21	-0.568112
RHOXF2	Gcgtgggagggggagtaggat	21	-0.521286
RHOXF2B	Gcgtgggagggggagtaggat	21	-0.521286
PRTG	GACCTCCCTGGCCCAGACCAA	21	-0.519126
TP73	GGACCTGCTTCGGCCCTGCGT	21	-0.483501
DOC2A	GCCTGAACGGCCAAAGGGAGG	21	-0.478715
CEBPA	GCTGGGCGCGCTGGAGGCGGT	21	-0.471078
PLK4	GCGCTGCGGAGAGTTTAGTTC	21	-0.454312
C3orf72	GTCTCTGGCGGAGCTGCCTCC	21	-0.447776
BAK1	GGCAGGCAGGGCGGCTGTCAG	21	-0.43898
HNF4A	GCCCAGCCTATCCACCGGCGG	21	-0.42799
CEBPA	GCTCCCGGCCGTGGCTGGATA	21	-0.42046
CTSD	GGTCACCCCGCGGGGCCCTCC	21	-0.413481
SPI1	GAGGTGACTGTTGGCTACATA	21	-0.412255
COL1A1	GGCCGGCTCCCCCTCTCCGAG	21	-0.400608
TGFBR2	GTGGTGTGGGAGGGCGGTGAG	21	-0.390002
SPI1	GACTGAGAGGGATGACTTTGG	21	-0.383076
PLXNA3	GCAGGCGGGGCCGCTGCTCCC	21	-0.37084
SPI1	GTTAGAGCAAAAGCCTCCCAG	21	-0.360116
SLC4A1	GGAGGGCCCCGAGAGGCCTTG	21	-0.351463
CEBPA	GCGCCCGTATCCAGCCACGGC	21	-0.347749
SPI1	GCTGGGGCAGGTGGTGCTCAA	21	-0.346704
SLC4A1	GTCAGGAGAACCATGGGGACC	21	-0.342609
TP73	GCCCGGCGAGGCCGCCCACGC	21	-0.33999
SPI1	GATCAGAGCCCTCACCCAGGA	21	-0.338056
CEBPA	GTCCTAGCgcgcggccggcat	21	-0.33782
PRTG	GCGGCGAGGCTGGTGCTCGGA	21	-0.328958
IGDCC3	GGCTGCAGCCCGGGACGGCGC	21	-0.323997
TP73	GCCGCGTCCAAGTCGGGGTCC	21	-0.317696
TP73	GCGCGGGCCACCGAGTCGCGG	21	-0.312431
CDKN1C	GgggcgggggcgggagTTAAA	21	-0.301088
PRDM1	GCGAAGAGAGGAAGCTCTCGG	21	-0.292005
TP73	GCCAGACCCGACCGCGATCTT	21	-0.286892
NR5A1	GGCTGCCTACCCGCCTCTGTG	21	-0.285393
HOXA13	GACGGGTGCACCGTGCAGAGC	21	-0.28192
TP73	GCCCTGGCGCCGGACCTGCTT	21	-0.277617
HOXC13	GCACATCCTATGCCTAGGCGG	21	-0.264374
RHOXF2B	GTAGACAGGCATGCGTGAGTG	21	-0.262757
RHOXF2	GTAGACAGGCATGCGTGAGTG	21	-0.262757
ARID1A	GGCCGCCTGGCAAACCCGGAG	21	-0.262074
COL2A1	GAAGCGTGACTCCCAGAGAGG	21	-0.250319
CEBPE	GACCCCTCAAAAAACAAACCC	21	-0.246625
FOXA1	GCCCGAGGTGCACCTGCAAgg	21	-0.24452
ZBTB10	Gggcgccaggggaccgggaaa	21	-0.243821
DUSP9	GAGCTGGGGCTTCCACCGAGG	21	-0.238689
KIAA1804	Gcgggcccggcccaaggtggt	21	-0.231648
IKZF3	GGGCAGGAGCCGGCGACCTGC	21	-0.231205
AHR	GAAGACGGAATGGAATCCAGA	21	-0.223675
RHOXF2	Ggtaagtggtgtagtagggtg	21	-0.223265
SLC4A1	GGCACCCAGTGGGAGCGGGGT	21	-0.223112
BCL2L11	GCAGGCTCGGACAGGTAAAGG	21	-0.222851
PTPN1	GCTGGAACTCAATGCCCTCCC	21	-0.214072
ATL1	GGAGTGCTCGGGCGGGCCGCT	21	-0.212015
OTOP2	GCCGCACCGGGGTGACGGAGT	21	-0.194474
SPI1	GTAGCCAACAGTCACCTCATT	21	-0.191614
SNAI1	GCTGGCCGGGCTCGCGCCGCG	21	-0.190212
HOXA13	GGGAGAGGCGGAGGAACGTGC	21	-0.189799
KIAA1804	GGCGCCcgggacgggtcaagg	21	-0.189657
FOXL2	GGAGATGAACTCGCCCGTGCG	21	-0.185341
NR5A1	GAAGAGAAACACCAACAAAGA	21	-0.181501
KIF18B	GGCAGAAGCCAACGCAGGGTT	21	-0.180592
HES7	GCCCCTCTAGGACCCGGCACG	21	-0.174532
COL2A1	GCGCTGCCCCCCTCTGACCAC	21	-0.174494
RNF182	GGCGTCCCGCCGACCCCTCCC	21	-0.172379
SLC4A1	GGCCAGTGGGGCGGGCAGATT	21	-0.169956
RHOXF2	Gggaggggtaagtggtgtagt	21	-0.165139
PRTG	GGGGCCTGAGAGTCCGGCTGG	21	-0.16411
COL1A1	GGGCCAGAGGTGCTGTGGTAG	21	-0.156989
RHOXF2B	GAGAGCACGCGTTGGTGGTGT	21	-0.154903
FOXL2	GCGAGTACCGGCAGATTTCAA	21	-0.150951
IER5L	GTTGGAGGCCCGGGGTCCGTT	21	-0.149407
CDKN1C	GGGGAGTGTTGCAGGGGGGAT	21	-0.147368
FOXL2	GCCCCTGAGGCTCGCTGGGCG	21	-0.144194
PRDM1	GGGAAAGCCCTGGGCTCGGCC	21	-0.143652
BCL2L11	GTCCGAGCCTGCAcgcgccgg	21	-0.137201
ATL1	GGGCGCCGACCCATGCTGGCT	21	-0.13702
BCL2L11	GCGCGCGGGAGGCAACCCAGC	21	-0.136984
PRTG	GAAGCAAGGGGCCTGAGAGTC	21	-0.135728
HOXC13	GCGGTAGGGGGTCTGTCTCTC	21	-0.132626
RHOXF2	GCATGCGTGAGTGTGGAACTT	21	-0.13237
RHOXF2B	GCATGCGTGAGTGTGGAACTT	21	-0.13237
HOXA13	GGTGAATGGTgcgcggccgcg	21	-0.128161
NIN	GAGCCGCGCGGGCCGCAGAGG	21	-0.121186
DUSP9	GGCTTCCACCGAGGCGGGACG	21	-0.12105
COL2A1	GTAACCTGAACCGCCCGCCCC	21	-0.116766
PTPN1	GTGACTCAACGGGCCGGGTCG	21	-0.11429
FOXO4	GAAATTTGGGAGGAGTGTCCG	21	-0.113689
PRTG	GTCCCGCCGGACAATGCACCT	21	-0.113484
ARID1A	GAGCCTCGTGTCGGAGTGAGG	21	-0.113482
ATL1	GCCTTATTTCTGAGAGTGGGA	21	-0.113337
FOXA1	GCGCCTCCGCGGGAAGTGAGC	21	-0.107506
DUSP9	GTGCTAGCCGAAGCAGTCGGG	21	-0.107447
PRDM1	GCCAACGTGGCCAACACCACC	21	-0.106149
FOXL2	GGGCGTTTACAAAAAGTGACT	21	-0.102821
KIF18B	GGGTTGGGCACACGAGAGTAG	21	-0.102779
CEBPE	GCCTACACTCAGAGAATGCTC	21	-0.0999211
RHOXF2	GAGCACGCGTTGGTGGTGTgg	21	-0.0988385
KIAA1804	Ggccctggcgcggctagggtg	21	-0.096113
CTSD	GGGTCGTGGGGCGGCCCACCC	21	-0.0953767
C3orf72	GCGGGTCGTGCTTCGGGAAAC	21	-0.0900483
COL2A1	GGCAGGGGGCGGCCCGCGGTT	21	-0.0893901
OTOP2	GGAGTGGGGTCGCCTCTCAAA	21	-0.0882785
HNF4A	GAATTAGGGGATCTCGGAGGT	21	-0.0844712
ARID1A	GAGCGGGCGCAGGCCGTGGAA	21	-0.0840672
ARID1A	GCAGAAAGCGGAGAGTCACAG	21	-0.0822948
FOXO4	GTGGTAAACAGAGACGTCAGG	21	-0.0806456
FOXL2	GCGTGAGCCTGGCTGTCGGCT	21	-0.0797213
ARID1A	GCTTGGGTCGAGGCTGCTGCG	21	-0.0792157
RNF182	GATCGCGCCCGCGGCCGGGGA	21	-0.0788414
SNAI1	GTGGCGGTGAGAGCCCGGGCG	21	-0.0786081
HOXC13	GCGGGAGCTGGGAGATTTAAA	21	-0.0773757
KIF18B	GTAGCGGGCAGAAGCCAACGC	21	-0.0738287
HOXA13	GGGCCCCACTGGGATAAAGGA	21	-0.0720359
NR5A1	GGTAGCCATTCACAAGGAGAG	21	-0.0705502
FOXO4	GCTGCTTGGAGCAAAACAAAA	21	-0.0689332
PRTG	GTAGTCCCAGGCCCGCGGCCG	21	-0.0672848
ARID1A	Ggagcgagcgcagcgcagcag	21	-0.0669801
ZBTB10	GCGGGGAGGAGTCTGCTTCTA	21	-0.0669692
SPI1	GATCTAGCAGGCTATCAGGCC	21	-0.0664266
ARID1A	GGGCGCTCTAGCCGCTCAGTC	21	-0.064208
DUSP9	GCAGGGCGCGTCGGGCAGGAC	21	-0.0634937
HES7	GGATGTCGAAGGGGGCGGGGT	21	-0.0614611
FOXA1	Gcaggcggctgccgcggagcg	21	-0.0581567
DUSP9	GCccaactcacagggtgatac	21	-0.0565889
ARID1A	GAAGGGAGCGAGTCCGTTCCA	21	-0.0558416
FOXL2	GGAGATGACGAGGACCCCGGT	21	-0.0548964
KIAA1804	Gcggaatgaacctggagaggg	21	-0.053391
DUSP9	GCCTAGAGAACAGAGGCTTGC	21	-0.0530765
ARID1A	GCGGGCGAGCAAGCGGTCGGC	21	-0.0527
SPI1	GCTCTGATCTAGCAGGCTATC	21	-0.052452
GKAP1	GGTCCAAACGCCTCACGTAGG	21	-0.0520384
HSPD1	GCCCAACAAAAGAGGGGCGTC	21	-0.0504483
NIT1	GAACCCCTTCGGAGAGGTAGA	21	-0.0500973

## Sheet: CRISPRa_inefficient
Inefficient sgRNAs targeting negatively selected genes in CRISPRa
gene	spacer	spacer length	phenotype score
CTSD	GCGTCTCGGAGGGGGACGA	19	-0.0469773
HNF4A	GGTTTCTGGCTGACACCCG	19	-0.0458829
SNAI1	GCGGAGACGAGCCTCCGAT	19	-0.0444634
ATL1	GGCACTCTGGTTCTGCGGC	19	-0.0434063
CEBPA	GcgcccACGTGGTCGGTAG	19	-0.0409752
HOXA13	GCATACGCCGTGGGCGGAG	19	-0.0404407
HSPD1	GCCCGATGGCACCTTGGAG	19	-0.0352619
IGDCC3	GGCGAGCGCTTTAAGCGGC	19	-0.0352285
IFI6	GGACTTTTGGAGCCGCTAA	19	-0.0330035
HES7	GGCTGGTTTACAGACCGTA	19	-0.0326384
SNAI1	GACGAGCCTCCGATTGGCG	19	-0.029176
CDKN1A	GAATGAGTTGGCACTCTCC	19	-0.0289767
HES7	GCCTCCTTATACAGCCTTA	19	-0.0234958
FOXL2	GCCGTTTGCTGCCGTCTTG	19	-0.0204506
AHR	GACCCACCGTCTCTCAAAC	19	-0.0170404
BRF2	GCACTCTGTAGTTAGTTTT	19	-0.0156518
DOC2A	GAGGGGCGTGAAGACGCGC	19	-0.0132736
IKZF3	GACATCACACGGAGGGTCG	19	-0.0109646
RNF182	GCGGGCGGCTTTGTCTCTA	19	-0.0108905
FOXL2	GGTACTCGCTCTGCGGGCT	19	-0.0106506
BRF2	GTTTTTGGGACCTAGACTG	19	-0.00543131
RHOXF2B	GCCCATTTTATGGCGATAA	19	-0.00335863
RHOXF2	GCCCATTTTATGGCGATAA	19	-0.00335863
DUSP9	GggCTCAGAGCTAGCAGCT	19	-0.00315623
AHR	GTCCTACGTCATCACGTGC	19	-0.00201693
RNF182	GGTAAGGCGATCGCGCCCG	19	-0.00147447
DOC2A	Gagatgccgacttcgtgcc	19	-0.000283672
ATL1	GTATAACCGTGCTTGAAAC	19	0.00227957
PLXNA3	GCCGGGCGGGTCCCCCTTC	19	0.00238921
ZBTB10	Gtcgaacacgtgcgttcac	19	0.0046413
RNF182	GCAGTACGTGACCAGTCCT	19	0.00556307
AHR	GTCATCACGTGCCGGGATG	19	0.00564439
KIF18B	GATACGGACGCTGACCAAT	19	0.00775843
IER5L	GTCTGCAGCATAGGTCGCC	19	0.00974078
ZBTB10	Gtagaagtataaacacgac	19	0.0143963
RIPK2	GCGACCCGGGCGGAGGATCC	20	-0.0479935
HOXC13	GCTGAATTTGGCCGACGCAA	20	-0.0477854
ATL1	GCACACGCCTGGGCATTCGT	20	-0.0457571
DOC2A	GAAGCAGCCGCCAGAATCGC	20	-0.0442271
SPI1	GTGTAGCTCTGCCACACCAC	20	-0.0421175
ZBTB10	Gccttttgtccccaacccct	20	-0.0421055
DOC2A	GTGTGTGTGCGAAGTTCTCC	20	-0.0417797
C3orf72	Ggagaggggagagcagcgac	20	-0.038103
HES7	GGCGGGACCCAGCTGAAAGG	20	-0.0375469
SNAI1	GCTCGGGGAGTGGCCTTCGG	20	-0.0343979
ZBTB10	GGTGAACTCGTGGCGAGAGA	20	-0.0327483
SLC4A1	GCAGGCGCCCTTGCACCTTG	20	-0.0305589
ZBTB10	Gggtgggggcgccaggggac	20	-0.0300973
AHR	GTAAGGACGCCCCCCCCCGC	20	-0.0296649
IKZF3	GCTTTAAAGGACGCTGGCCG	20	-0.027719
SNAI1	GCAGGACGCCGCGCGCCCAC	20	-0.020819
RNF182	GTGGTGGTGGCGGCCCATCG	20	-0.0194074
CEBPE	GCTCTACACGCGAGCCTGCG	20	-0.019205
IER5L	GCTCCCGGGACCTAAGGCGA	20	-0.0190495
DUSP9	GCACTGTAGCTGGCGGCTCG	20	-0.0167285
ARID1A	GACTCTCCGCTTTCTGCTGC	20	-0.0147833
IER5L	GCTGCCCTCGCCTTAGGTCC	20	-0.0131779
SLC4A1	GATCAAACCTTCATCCACAA	20	-0.0124232
KIAA1804	Gactggcctaggggcgggcc	20	-0.0117331
IFI6	GataggtgttgttTACTAAT	20	-0.0112171
KIF18B	GTTGCGAGAGCCGTTCACAG	20	-0.0106589
NIN	GGGCTGGTCCTACAGAGACT	20	-0.00988327
OTOP2	GACCTTGGAGGGGTCCAACC	20	-0.0096443
PTPN1	GAGCCCACGCGCCGTGGGCG	20	-0.00936659
POU4F3	GCTCGAACTGCCTGGATAAA	20	-0.00906497
IKZF3	GTCTGCGCCGACGCGGCTGC	20	-0.00904241
OTOP2	GCCCGAGCCTGGCCGCACCG	20	-0.0088723
RNF182	GAGAAACAGGCGGTTTGTGA	20	-0.00820332
DOC2A	GGAACACCCGGCGATTCTGG	20	-0.00802488
HSPD1	GGGCCTGTCTGAGGCGTACG	20	-0.00800853
ARID1A	GGCTCTGTAGGCTCGGGACC	20	-0.00666809
BAK1	Gagcctctgttcatctgaat	20	-0.00664554
PTPN1	GCGGCGCGCGCCTGTTGCCT	20	-0.00575385
RNF182	GTCTTGTTGAGGGCTCCCGT	20	-0.00551403
PLXNA3	GACGCGCGCCCCAGGCCCGA	20	-0.00539466
PLK4	GTTTAAGACTTGACGGAACA	20	-0.00432969
ATL1	GCACATTATTTTAGCTACTT	20	-0.00401025
TP73	GACGCGCGCCAAAAGGCGGC	20	-0.0040045
DUSP9	GCTAGCAGCTTGGGCAAACT	20	-0.00371285
AHR	GCACGAAGATGGCTACCGGC	20	-0.0030829
BRF2	GTTTCTACCCGAGCCCGCGG	20	-0.00247064
IGDCC3	GAAGTGGACACCAGCGGACT	20	-0.00211934
PLXNA3	GgccATCGAGCGAAGGGGGT	20	-0.00189705
RIPK2	GGGCGGAGGATCCCGGCCGC	20	-0.00174975
CEBPE	GAAGTGTACCAGGCTGCTAG	20	-0.000656876
BRF2	GTCCTAAGGGAATCGCAGGT	20	0.000938604
CDKN1A	GATTTGTGGCTCACTTCGTG	20	0.00311723
CEBPA	GAGTCTTGGTCTTGAGCTGC	20	0.00384882
BCL2L11	GCTTGCCAGCCCGCGCGCCG	20	0.0041217
ATL1	GCAAGGTCATGTTAGTAAAG	20	0.0041217
PLK4	GTCAAGCGTTTAAGACTTGA	20	0.00472021
DOC2A	Gggtaagattaggtggtgtt	20	0.00498131
HSPD1	GAAAAAATCACCCAGCGCGC	20	0.00525993
OTOP2	GATTCAGGGTGCGCCGCGGC	20	0.00550395
GKAP1	GGCCTAGAGTCTCACTCCCT	20	0.00616951
HSPD1	GCGAATCGCGGTGCGCGTCG	20	0.00632128
OTOP2	GAGTTCCTGACCCGCAGGGT	20	0.00640733
HOXA13	GCCCGCTTTGCATACGCCGT	20	0.00704269
OTOP2	GGGCAGTCGGACTTGGGGAG	20	0.00745801
COL2A1	GGTTCAGGTTACAGCCCAGC	20	0.00782337
POU4F3	GCGCAGGCGTGCTCACGCGC	20	0.00789206
PTPN1	GCGTTCCCTCCTCCGCTTTG	20	0.00851649
RNF182	GatggtggtgCGACGGGAGT	20	0.00929642
NIN	GGTGGTGACCACGGTAGGAC	20	0.0108757
PTPN1	GCCTGTTGCCTAGGCGACCC	20	0.014845
CTSD	GATGTCTGGGAGCGTCTCGG	20	0.0149623
SLC4A1	GGTTTGATCGCTCTGTCCTC	20	0.0151501
NIN	GCATTCCCTAGAGACTGGTG	20	0.0169411
RNF182	GGAGCGAGCCCAGGGCCAAG	20	0.0235178
RIPK2	GGGGCTTTATTAGGGGGCAC	20	0.0245126
NR5A1	GGCTGTTCCAGGCCCGCTGT	20	0.0248336
GKAP1	GTGGCGCCGCCGCCTACGTG	20	0.0410046
OTOP2	GCTGCGCGCCAGGGCGCGGT	20	0.0443006
SLC4A1	GGGGACCAGGAGGGCCCCGAG	21	-0.049863
PRDM1	GCGCCAGGAAGGAGGGCGATC	21	-0.0488544
DUSP9	GCGGAGAAGACGGCGACTGGA	21	-0.0481594
SLC4A1	GACTCACAGCTGTCCAGATGT	21	-0.0439153
OTOP2	GTCCATCTCGGCGTGGGAGAG	21	-0.0430551
DUSP9	GCAGAGGCCAAGGGCAGGTCA	21	-0.0416778
ARID1A	GCCCGCTCCGCTCTCCACTCC	21	-0.0416537
KIAA1804	Ggcgggatggtgcagttggtg	21	-0.0411927
DOC2A	GctcccgagcgggcCCCGGGT	21	-0.0401919
ZBTB10	GCTACGCGGAGGACAAACAGC	21	-0.0385201
OTOP2	GACCCGCAGGGTTGGGGCTTC	21	-0.0384786
CEBPA	Gcgttgcgccgcggcctgcct	21	-0.0377875
RHOXF2B	GCCCACAAGCTTTGCAAATCC	21	-0.0376617
COL1A1	GCTGGGTCCTCAGAATGGCGT	21	-0.0369796
RIPK2	GCCTGCTGGCGGGTGTCGGAT	21	-0.035932
PLK4	GGTGTAAACGGTGTTCCTTAA	21	-0.035903
HOXC13	GAACCCCAGGAGACCTGGCCG	21	-0.0350847
NIN	GCCGCAGAGGAGGAGCCGCGC	21	-0.0350382
FOXA1	GgcgccggGGAGCGCCTCCGC	21	-0.033932
NIT1	GGGGGAGCCTGTGGCTTGTGC	21	-0.0335479
ARID1A	GggagggGGACCCGGGACGGG	21	-0.0334823
HOXC13	GGGGTTCCCTCCCCTCGAGGT	21	-0.0334144
ZBTB10	GACAAACAGCTGGCGAGTGTC	21	-0.0333672
ZBTB10	GCAGACTCCTCCCCGCTCCTG	21	-0.0331607
PRTG	GGGGAAGGGTACGGGTCCCGC	21	-0.0325248
C3orf72	GCGCCTGACGCAAGCGGAACT	21	-0.0323587
FOXO4	GCAAAACAAAAGGGAAACCCG	21	-0.0323528
HSPD1	GGGCGACCGCCCTCCCTCCCT	21	-0.0321591
ZBTB10	Gctgcgcctccggcctggggg	21	-0.0319066
NIT1	GCTAGCCGAACCCCTTCGGAG	21	-0.0318895
PTPN1	GCCTGGAGAGCCCACGCGCCG	21	-0.0312412
OTOP2	GGCTCTTCCCTAAATTCACCT	21	-0.03054
PRTG	GAGTGGACAGCGCCGCGGCCG	21	-0.0303237
AHR	GATTCCATTCCGTCTTCCTTG	21	-0.0301706
COL1A1	GGGTGGGGAGACTTCCAAAGG	21	-0.0299742
SLC4A1	GTAAGAGATAACTCTGTTTAC	21	-0.0295871
PLXNA3	GCGTCTCCGAGCGCCAGGGTG	21	-0.0288163
PRTG	GTGGCGGCCGGGTCGGAGCCC	21	-0.0278907
NIN	GGCTCCGGGTGCGGGTGTAGG	21	-0.0264572
ARID1A	Gcgaggcccgcccgggcgggt	21	-0.0262153
IER5L	GAGGCCCAGCCGTGCGGAAAG	21	-0.0250515
DOC2A	GGTCGCCTGCTGTCACCGGCC	21	-0.024837
HSPD1	GCTGACGCGAAGACTCGGAGG	21	-0.0247426
RNF182	GCCTGTTTCTCCCCAGCGAGA	21	-0.0244381
OTOP2	GGAGAAGCGGCAGCACCCGGT	21	-0.0242431
PLK4	GCCATAAGTGTCCCATCTTTA	21	-0.0234245
POU4F3	GACTCGCAGGGGCGGCCCGGG	21	-0.0220453
IER5L	GGCGGGCTGCGCCTGTCACTC	21	-0.0217976
COL1A1	GCCAGGCAGCTCTGATTGGCT	21	-0.0217149
COL2A1	GATCAGGCCACTCGGCGCACT	21	-0.0216657
SNAI1	GCGCGGGTCGTCCCCGGTGCT	21	-0.0216029
CEBPE	GCTTGGCCAAAGCACCTGGTC	21	-0.0211441
FOXA1	GAAGCCCAGAGCTgcggggcg	21	-0.0206503
FOXL2	GCTGAACTTCTAGCTcggggc	21	-0.0205022
RNF182	GTTTGTGAGGGAGACTGAGAG	21	-0.0204273
KIF18B	GAAACTGCAGCCGACAGGAAG	21	-0.0204263
HES7	GAATCTGGATGTCGAAGGGGG	21	-0.0200257
CTSD	GGCGCGAGCGGCGGGAACTGT	21	-0.0196868
IER5L	GGCTTCAACGTGGCCGCTGCC	21	-0.0194241
RIPK2	GGTAGCGGCAGCGTCCGGCTG	21	-0.0193038
DOC2A	GAGGCCGGTGGTCCGGCCTTG	21	-0.0192988
COL2A1	GCAGGGCCCAGGCGGGCTCCG	21	-0.0187063
DOC2A	GTGGTCCGGCCTTGGGGACCC	21	-0.018395
IER5L	GATTGGCCAGCCGAGTAGCCC	21	-0.0182078
RHOXF2	GGCCTGGATTTGCAAAGCTTG	21	-0.0180994
PLXNA3	GGGTCCCCCTTCAGGTCGCGG	21	-0.0179192
FOXL2	GGGCCCGAGCTTCCTGGGCTT	21	-0.0178315
FOXA1	GTCTTTGTGCGGCGGACAAAT	21	-0.0178121
ZBTB10	GGGTAGGTGCGTGTGGGCAGC	21	-0.0177564
KIAA1804	Gggggcggggcggccctggcg	21	-0.0166346
RNF182	GAGGGCTCCCGTAGGAGAGAG	21	-0.0163329
IFI6	GGTGAAAGGCCTGTGTGCCCC	21	-0.0157371
FOXA1	GCTCTGGGCTTCCTCTTCGCC	21	-0.0154289
DOC2A	GGAGACCCCGAGATCCCCGGC	21	-0.0146498
NIT1	GGGTCTGGAATACTAGCGAGA	21	-0.0140372
ZBTB10	GAAAATGCGCGTCCCGGGCGC	21	-0.0134264
PTPN1	GAATTTCGACAAGCACTTCCG	21	-0.0133958
CTSD	GGCTGACCCCGCGGGCGCGAG	21	-0.013369
KIAA1804	GgtggggcgAACCTAGGAAGG	21	-0.0128717
SNAI1	GGCGGGACGTCGAGCGAAGCG	21	-0.0127953
DOC2A	Gtgcgcgcgggggtgcccggt	21	-0.0126367
POU4F3	GCCCGGGTATAAAGGCTGTGG	21	-0.0123612
TP73	GCAGGAGCGACGCGCGCCAAA	21	-0.0118145
KIAA1804	Gggaagtgaacctggcgaggg	21	-0.0115419
BCL2L11	GCCTGCAcgcgccggcggccg	21	-0.0112329
NIT1	GCTAGTATTCCAGACCCAGGT	21	-0.0106618
DOC2A	GAggcgccgtggccgcgcgcg	21	-0.0101182
BCL2L11	GCCGGGTTGGGGTAGGTGAGC	21	-0.00964648
NIN	GCTGTGGGGTGCATCAGAAAC	21	-0.00953419
SNAI1	GACAAAGGGGCGTGGCAGATA	21	-0.0094494
HOXA13	Gcgcgatccgcccccctcgct	21	-0.00934349
DOC2A	GCGGCTGCTTCCTGGTGGCGC	21	-0.00918862
PLXNA3	Gccgccgcgtccccctcggcc	21	-0.00877295
RIPK2	GTCCGGCTGGGGGCTTTATTA	21	-0.00838255
NIN	GAGCGGGAGGGCGCGTCTGCG	21	-0.00830957
HNF4A	GAAGGGGTGGAGGCTCTGCCG	21	-0.00820958
PRDM1	GATTTCTCAGCTCAAATCCCC	21	-0.00813796
RNF182	GCTGGCTGCTGCCCCAGCGTT	21	-0.00811968
NIN	GCAGCCTCTCCAGTCCTACCG	21	-0.00804343
DOC2A	GGGTGTTCCCCAACTACTCCT	21	-0.007809
RNF182	GAGAGAGGGGCGTGTTTGTGG	21	-0.00762577
RNF182	GTCCTTGGCACAGAGTCACTC	21	-0.00740564
DUSP9	GCCCAGGAGGGGCACTGTAGC	21	-0.00721584
HES7	GTGAGGGGTGAATGGGGGCAC	21	-0.00713354
ATL1	GACGGTTTAGCCAAGGCCCGT	21	-0.00708087
HES7	GGGGCAGAATCTGGATGTCGA	21	-0.00687608
ARID1A	GGCTGCTGCGCGGCAGCGGGC	21	-0.00680557
CTSD	GCCGGGACAGGGGTCACCCCG	21	-0.00678674
CTSD	GGGTCTGGAGGATTCCCGTTT	21	-0.00676716
DOC2A	GGGACATGGGCCCCTGGGAGT	21	-0.00651321
HSPD1	GTGCTGCCGGTGTGTAAGGCA	21	-0.0062422
CEBPE	GCATGCTCTGGAGCACCACGC	21	-0.00622232
RHOXF2B	GAATTGTGCAAGCCCATTTTA	21	-0.00557339
RHOXF2	GAATTGTGCAAGCCCATTTTA	21	-0.00557339
RIPK2	GACGCTGCCGCTACCGGGGTT	21	-0.00533899
BCL2L11	GCGCCGGGGCGGGACCTAGCG	21	-0.00517943
RNF182	Gtagtggtggagggtgtctgt	21	-0.00508171
CEBPE	GCTGCTAGAGGTAGCTAGGGC	21	-0.00484906
NIN	GCGGGTGAGTGTAGGCGTGTT	21	-0.00470532
COL2A1	GCCCGCCCCCGGAGCCCGCCT	21	-0.00450084
ATL1	GTTGTGTTCTCAGCAGGCCTC	21	-0.00447162
CEBPE	GAGCCAGAGGAAGGCGTGTCA	21	-0.00412769
OTOP2	GTCCGACTGCCCTCCGGCCCG	21	-0.00391346
NR5A1	GCAGCCCCGCTTGTTAGAAAC	21	-0.00390859
RNF182	GGAGAGGACAAGGACCCCCGA	21	-0.00388265
HSPD1	GGAGTAATGGTGAGTCCCGCG	21	-0.00377797
COL1A1	GCTCCCCCTCTCCGAGGGGCA	21	-0.00361609
PLK4	GATGGGACACTTATGGCTGAT	21	-0.00345306
BCL2L11	GGCTAGGGTACACTTCGGGGT	21	-0.00332263
FOXO4	GTCTCTGTTTACCACTCGCCG	21	-0.00298726
DOC2A	Gacttcgtgccaggcccagtt	21	-0.00273472
CEBPE	GGCTGGAAACGCACTAACATG	21	-0.00244527
NIN	GAGCAAAATTACCAGAATGAG	21	-0.00240825
RNF182	GGCGCGATCGCCTTACCTggc	21	-0.00236518
IGDCC3	GCTGTGTGTCTTTCCGCAGCC	21	-0.00217195
DUSP9	GCCCCCACTCATTGGCGCCAC	21	-0.00204961
NIN	GAGATCTGAAGTTAGAAACGC	21	-0.00167107
DOC2A	GGCGTGAAGACGCGCGGGGGT	21	-0.00159734
AHR	GACGGTGGGTCAGCTAACTTG	21	-0.00143323
HSPD1	GAAGGGGTAGTTCTTTCACCT	21	-0.00140324
HSPD1	GCCCTGGGGGAGAAAAGGGTC	21	-0.00132572
IKZF3	GATGCGACATTTCCATCCTGT	21	-0.00121275
BRF2	GACCTAGACTGGGGTTGAATT	21	-0.00117621
ARID1A	GGGGAATGAGCCGGGAGAGCC	21	-0.00107852
ARID1A	GCCCCCCTCATTCCCAGGCAA	21	-0.00092131
DUSP9	GGCTAGCACCCGTTGGCTCAc	21	-0.000633216
CEBPA	Gagcgcggcgctgtgccgcgc	21	-0.000594009
IFI6	GATGAGAGCCACGGCCATACT	21	-3.88e-05
HES7	GGGTCCTATCCCTCCTACCCT	21	2.38e-05
HSPD1	GGGGGCTAGCGGCGACCGCTG	21	0.000468701
NIN	GCCCCTGATGTGAGTGCATGC	21	0.000646142
ARID1A	Ggctgccctccccacccgccc	21	0.00108779
NIN	GTGACCACGGTAGGACTGGAG	21	0.00157755
PRDM1	GCCCCCTAATTCTGCCGCGCC	21	0.00218699
NIN	GTAGGCGTGTTGGGAAAGAAA	21	0.00223086
OTOP2	GCGCCGGCTCCAAGCCCAGCC	21	0.00225878
RIPK2	GCCCAAAGGAGAATCCTGTTG	21	0.00269637
KIF18B	GGGCCGGACCGTGCTTCCTAT	21	0.00291642
ATL1	GGCCTGTAGGGTGACGGGTAG	21	0.00307141
HNF4A	GGCATTCTAACTGATACTATC	21	0.00358372
OTOP2	GGAATGCTGCGCGCCAGGGCG	21	0.00396698
POU4F3	GTCTGGCGGGTTGGAGCCAGC	21	0.00410519
DOC2A	GccAGGTCTCCCAGGAGTAGT	21	0.00420865
BCL2L11	GGCGCGCACATGGCCGCCAGC	21	0.00433867
RNF182	GATGCGAATACCACTTGGCCC	21	0.00442381
OTOP2	GCCGGAGGGCAGTCGGACTTG	21	0.0046329
PLXNA3	GgacgcggccATCGAGCGAAG	21	0.00471625
DOC2A	GGACCACCGGCCTCGTTGTCA	21	0.00497199
RNF182	GCTGCCACACTGCGCAGCTAC	21	0.0053035
DUSP9	GAGTGGGGGCTCCGGCGCTTG	21	0.00577354
POU4F3	GCCAGCGGGGCGGGGCGGACT	21	0.00593059
POU4F3	GTGAGGAGAGACAGCAGCTAG	21	0.00645947
IFI6	GCAGCACACAAATGTTCCCGC	21	0.00647918
NIN	GTGCCAGGTGGTGACCACGGT	21	0.00710119
IGDCC3	GGCCGGACATTCCCGGCTGCG	21	0.0072642
IFI6	GCACTTCAAGCTGAGGACTTT	21	0.00763483
COL1A1	GTTCCACTTCTTCTAGATTGG	21	0.00767152
DUSP9	GGGGACCAGCTGCGGCTCCCC	21	0.00770718
DOC2A	GTAAGTGTGCCAgcgcgcgcc	21	0.00778001
HSPD1	GGGTCAAATCGCGTCATTTCC	21	0.00788683
PLXNA3	GCGAGGCCGCGCCCCGGTGGC	21	0.00802646
CDKN1A	GTAAATCCTTGCCTGCCAGAG	21	0.00905566
OTOP2	GCCCTCTAGGTGCCGCAGTGC	21	0.00956153
HSPD1	GCGCACCGCGATTCGCCCCAA	21	0.0100901
BCL2L11	GCTGGCAAGCTccgcccccct	21	0.0102253
NIN	GACTGCCAAACTCAAGGCTGA	21	0.0104197
RNF182	GGAGCTCGCGCGAGGAGCTAG	21	0.0109915
IFI6	GCCTGATCACCAGCTCCCCCT	21	0.0110148
HOXC13	GGATCTCAGGTAGGCCAAAGG	21	0.011485
AHR	GacaactggtagacaacCAAT	21	0.0133391
POU4F3	GCCTGGATAAAAGGGTAGCCC	21	0.0137659
RIPK2	GTCGGATTGGTTAGCGACCAC	21	0.0145936
KIF18B	GTCAGCGTCCGTATCGCTGAT	21	0.0158015
CTSD	GGGTCAGCCCGGCCCAGCTTC	21	0.0159104
CTSD	GACCCCAGGCCAGGCCGAAAC	21	0.0160198
CDKN1A	GCTGACCCACTCTGGCAGGCA	21	0.0162646
OTOP2	GGAGGGCGTCAGGGTGCCCGC	21	0.0171451
DOC2A	GCGTCGCCATGACAACGAGGC	21	0.0182548
NIT1	GGTGAGAGCCACGCCTCCGTG	21	0.0199099
POU4F3	GCTCACGCGCCGGGGACTCGC	21	0.021164
KIF18B	GTTCAAATTAGCCGGGCGGGC	21	0.0228774
RNF182	GCGAGGAGCTAGCGGGCTGGC	21	0.0298865
RNF182	GGAGGGAGGTTCCCGTGGAGG	21	0.0302066
NIT1	GCGGTGTCCGCAGAGCAGGTG	21	0.0309465
NIN	GAGGAGGAGTCAGGGCGACGC	21	0.0318187
BRF2	GCTCGGGTAGAAACGTGAGCT	21	0.0343219
