# Supplementary material for: Sequence determinants of improved CRISPR sgRNA design
Source: HighWire-hosted journal article supplement (doi:10.1101/gr.191452.115), 2015-06-10
Supplement: Supplemental_Table_7.xlsx [file Supplemental_Table_7.xlsx]

## Sheet: 19nt
Coefficients of nucleotide preference for 19nt sgRNA spacers in CRISPRi/a. The coefficients were trained by Elastic-Net.
index	A	C	G	T
-19	0	0	0	0
-18	-0.00450252	0.00727882	-0.00486393	0.00174306
-17	-0.0139846	0.0252499	-0.000139002	-0.0181495
-16	0.00416604	0.00154683	-0.00369786	-0.00139861
-15	0.0100895	-0.0043659	0.0299576	-0.0395302
-14	0.00509645	-0.00431563	0.00721541	-0.00925528
-13	-0.0107177	-0.00788471	0.0335698	-0.0277151
-12	-0.0253375	0.0254709	0.0103868	-0.0248632
-11	0.019153	0.00256971	0.0145347	-0.0413078
-10	0.00936004	0.00303776	0.0071344	-0.0244048
-9	0.0218912	-0.0210749	0.00804885	-0.00488175
-8	-0.0119802	0.0118277	0.0170428	-0.0314654
-7	-0.00687696	-0.00184407	0.00404476	0.00297032
-6	0.0155149	-0.00211884	0.000841796	-0.0133148
-5	0.00708224	0.00143037	-0.0133591	0.011377
-4	0.0186874	-0.0256882	0.00613012	0.00650573
-3	0.00403093	0.0037639	-0.0147263	0.0103278
-2	0.0160795	-0.0261147	0.00247294	0.0166221
-1	0.00208449	-0.0226494	0.00310965	0.0228189

## Sheet: 20nt
Coefficients of nucleotide preference for 20nt sgRNA spacers in CRISPRi/a. The coefficients were trained by Elastic-Net.
index	A	C	G	T
-20	0	0	0	0
-19	0.00644793	-0.00512654	0.0186817	-0.0263186
-18	-0.00255671	0.0178443	-0.00122844	-0.0208267
-17	0.0206712	0.00181097	0.00926512	-0.037269
-16	-0.015412	-0.00686574	0.0222598	-0.00717962
-15	0.00670197	-0.0093278	0.012668	-0.0106183
-14	0.00399032	0.0084763	0.0116377	-0.0319559
-13	-0.00519446	-0.00254678	0.0246575	-0.0288459
-12	-0.0285265	0.00901527	0.0304875	-0.0257871
-11	-0.00959861	0.00257197	0.0189134	-0.0231865
-10	0.010478	-0.00946214	0.0343142	-0.0455069
-9	0.0291225	-0.0141025	0.00235982	-0.0126594
-8	0.00431598	-0.00685009	0.027894	-0.0395218
-7	0.0141066	-0.00323474	-0.0150225	0.0128128
-6	0.0376519	-0.00315325	-0.0212335	-0.00178908
-5	0.0159313	0.025584	-0.0339124	0.000224124
-4	0.0256158	-0.0229306	0.014185	-0.0137839
-3	-0.0104057	0.00539296	0.00983763	-0.0111914
-2	0.0455036	-0.019971	0.00335443	-0.0156738
-1	0.0248649	-0.042763	0.0350556	-0.0122914

## Sheet: 21nt
Coefficients of nucleotide preference for 21nt sgRNA spacers in CRISPRi/a. The coefficients were trained by Elastic-Net.
index	A	C	G	T
-21	0	0	0	0
-20	0.00618984	0.0227547	0.00605445	-0.0522678
-19	0.0100082	0.0194298	-0.0261492	-0.000357006
-18	0.00208934	0.0178026	0.0120178	-0.04631
-17	0.00949464	0.0161287	0.00684895	-0.0440453
-16	0.00418978	-0.00701735	0.0309073	-0.0399109
-15	-0.00317531	0.00216282	0.0161483	-0.0249212
-14	-0.00870226	0.0194978	0.0255217	-0.0614693
-13	-0.00802556	0.0131528	0.0134273	-0.031525
-12	-0.0074222	0.0445579	0.00238349	-0.0602363
-11	-0.00510013	-0.0028652	0.0267573	-0.0337036
-10	0.00760374	-0.0224461	0.0422219	-0.0381811
-9	0.00825131	-0.016917	0.0389941	-0.0443903
-8	0.0360454	-0.0105788	0.0140116	-0.0420417
-7	0.0123915	0.00850103	-0.0215942	0.00944836
-6	0.0419031	0.0102192	-0.0263243	-0.0178036
-5	0.0489754	0.0399562	-0.0611518	-0.0101039
-4	0.0511732	-0.0342527	0.0029875	-0.0120174
-3	0.0345637	0.0290691	-0.0394652	-0.017106
-2	0.0726335	-0.0485628	0.00930014	-0.0122325
-1	0.0618672	-0.0950798	0.0648461	-0.0169037
